# Supplementary material
Source: Royal Society of Chemistry journal article supplement (doi:10.1039/d6nj00322b)
Supplement: d6nj00322b1.pdf [file d6nj00322b1.pdf]

Supplementary Data

## Mechanistic Unveiling of $\text{NH}_3\text{BH}_3$ Hydrolysis Catalyzed by a Cu–CAAC Complex

Kehan Qian and Yong Wang\*

College of Chemistry, Chemical Engineering and Materials Science, Soochow University, Suzhou 215123, PR China

E-mail: [yowang@suda.edu.cn](mailto:yowang@suda.edu.cn)

### Contents

|                                                                                                                                                                                                        |         |
|--------------------------------------------------------------------------------------------------------------------------------------------------------------------------------------------------------|---------|
| <b>Figure S1.</b> Potential energy surface scan of the H...H distance between INT3 and $[\text{NH}_3\text{BH}_2(\text{H}_2\text{O})]^+$ .....                                                          | S2      |
| <b>Figure S2.</b> The attempt at transition state optimization. ....                                                                                                                                   | S3      |
| <b>Figure S3.</b> Optimized 3D structures of <b>1</b> , INT1, INT5, INT5-a, INT6, INT7, INT8, INT9....                                                                                                 | S4      |
| <b>Figure S4.</b> Optimized 3D structures of TS7, TS7-a TS8, TS9, TS10, TS11.....                                                                                                                      | S5      |
| <b>Figure S5.</b> Optimized 3D structures of CI-INT1, CI-INT2, CI-INT3, CI-TS1, CI-TS2.....                                                                                                            | S6      |
| Coordinates for all structures.....                                                                                                                                                                    | S7-S35  |
| <b>Table S1.</b> The thermal correction to free energy/au, electronic energies/au, gibbs free energies (G/au), entropies (S/[cal/(mol·K)]) and enthalpies (H/au) for the overall catalytic cycle. .... | S36-S37 |

Total 37 pages

To investigate the potential transition state for the direct reaction of **INT3** with  $[\text{NH}_3\text{BH}_2(\text{H}_2\text{O})]^+$  to form  $\text{H}_2$ , a potential energy surface scan was performed by varying the distance between the two relevant H atoms, as shown in Figure S2. When the interatomic distance between the two H atoms reached 1.00 Å, a L502 error occurred in Gaussian. Notably, the system was still far from the expected convergence region of the transition state at this point.

Subsequently, attempts were made to optimize the transition state by adjusting the structure parameters. these efforts not only failed to yield the desired transition state structure but also did not result in product formation. Instead, the optimization process directly reverted to the initial reactants (**INT3** and  $[\text{NH}_3\text{BH}_2(\text{H}_2\text{O})]^+$ ), as illustrated in Figure S3. Based on these observations, we conclude that a direct reaction between **INT3** and  $[\text{NH}_3\text{BH}_2(\text{H}_2\text{O})]^+$  to generate  $\text{H}_2$  is unlikely.

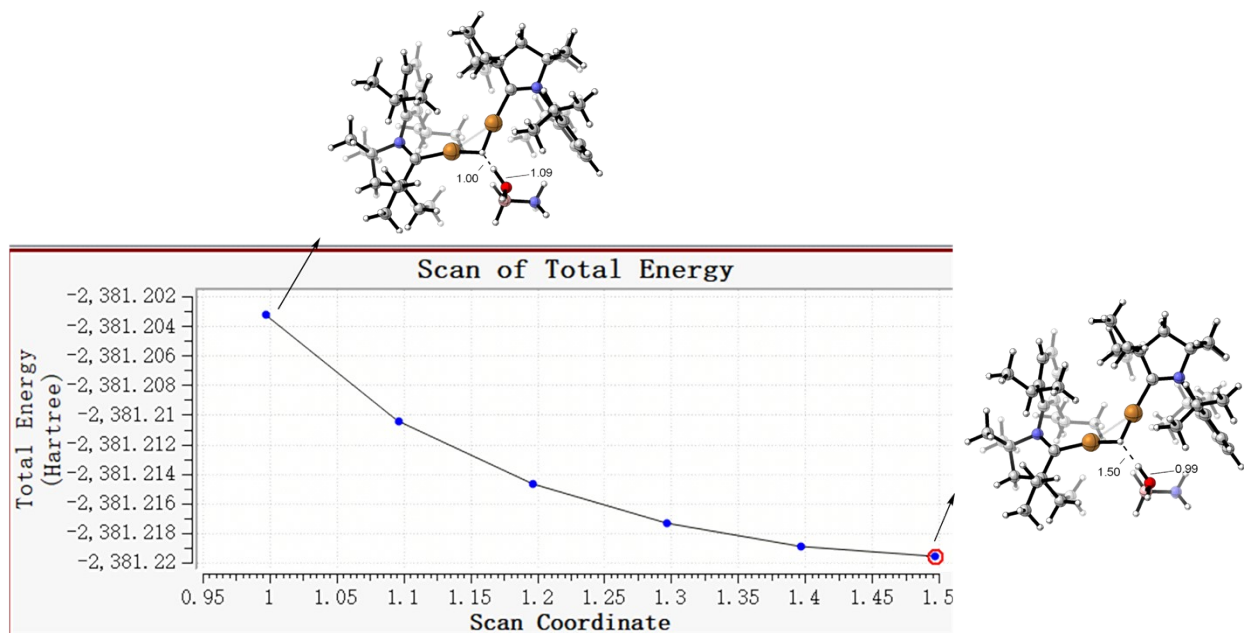

**Figure S1.** Potential energy surface scan of the H...H distance between **INT3** and  $[\text{NH}_3\text{BH}_2(\text{H}_2\text{O})]^+$ .

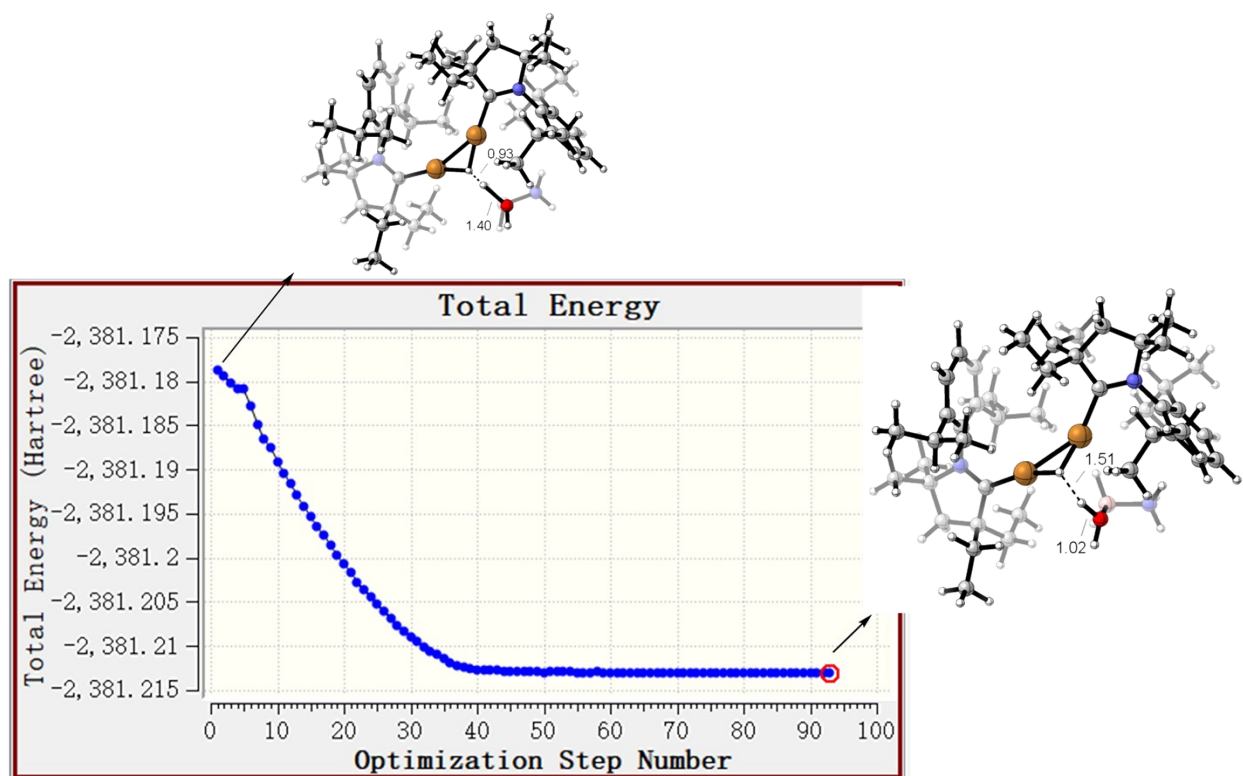

**Figure S2.** The attempt at transition state optimization.

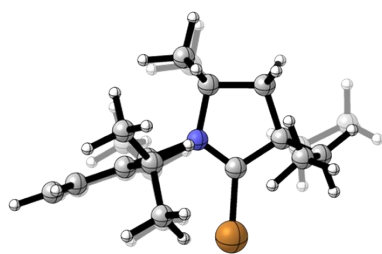

**1**

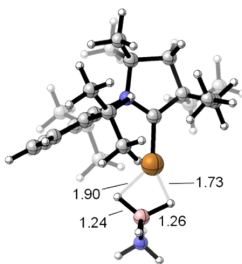

**INT1**

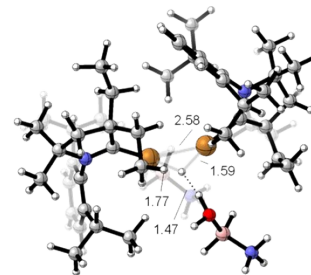

**INT5**

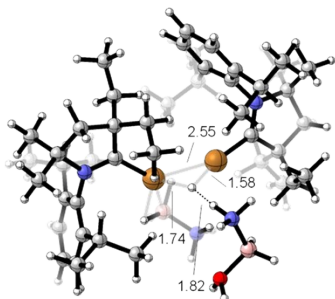

**INT5-a**

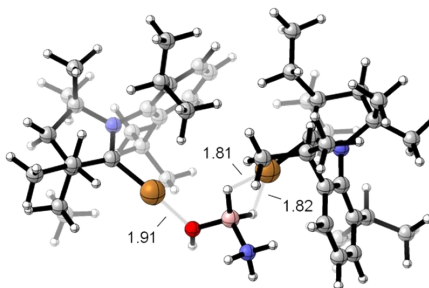

**INT6**

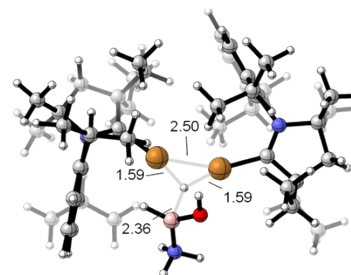

**INT7**

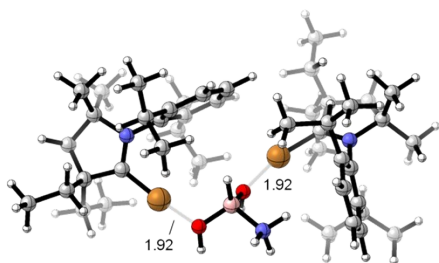

**INT8**

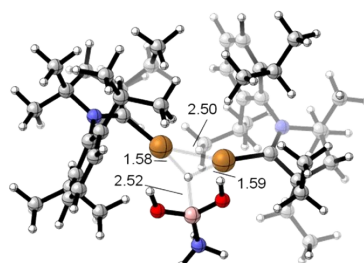

**INT9**

**Figure S3.** Optimized 3D structures of **1**, **INT1**, **INT5**, **INT5-a**, **INT6**, **INT7**, **INT8**, **INT9**

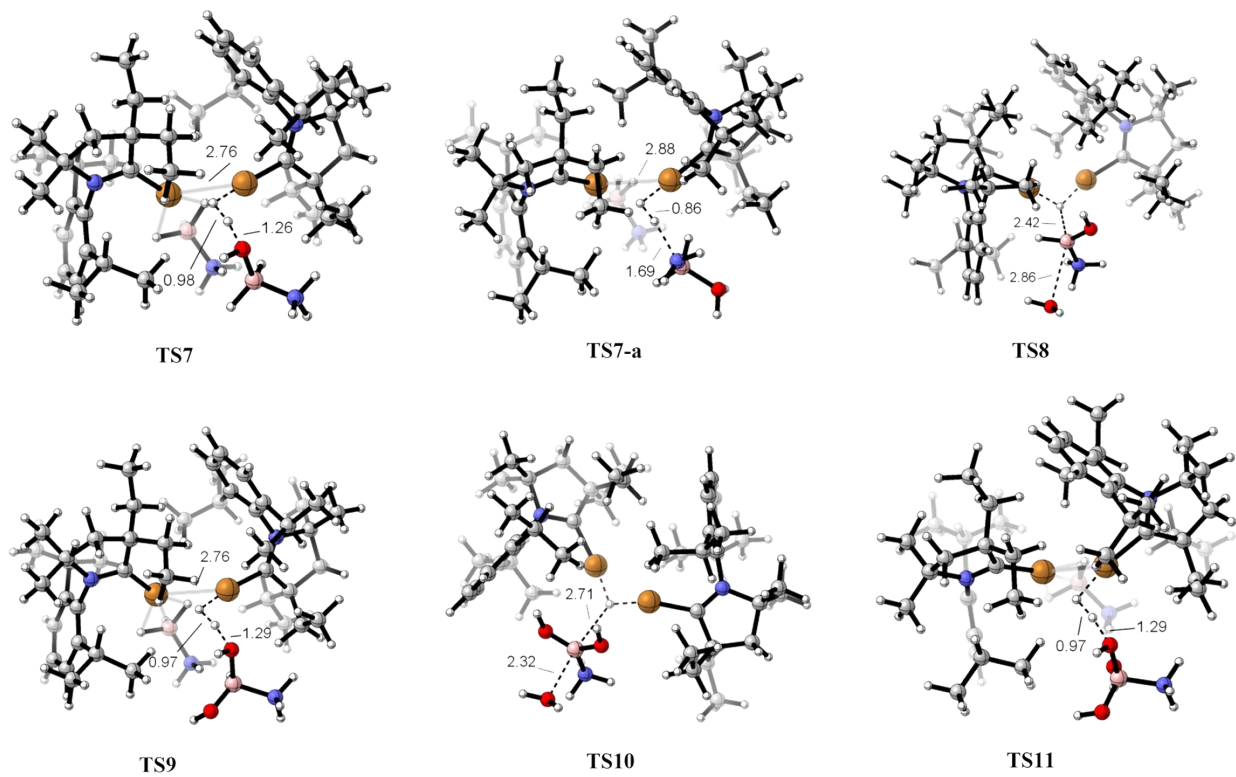

**Figure S4.** Optimized 3D structures of TS7, TS7-a, TS8, TS9, TS10, TS11

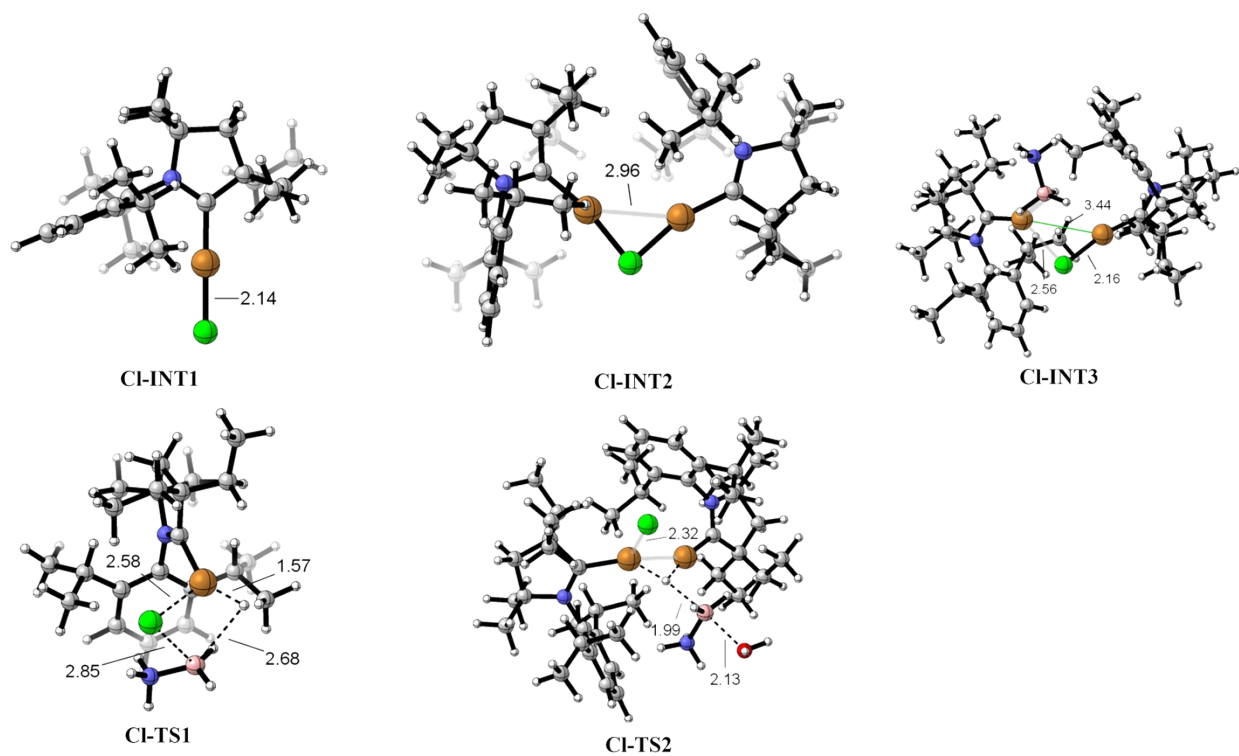

**Figure S5.** Optimized 3D structures of CI-INT1, CI-INT2, CI-INT3, CI-TS1, CI-TS2

## Coordinates for all structures.

### NH<sub>3</sub>BH<sub>3</sub>

E<sub>solv</sub> = -83.196393 a.u.

Zero-point energy correction = 0.04633 a.u.

|   |             |             |             |
|---|-------------|-------------|-------------|
| N | -0.71892000 | 0.00002300  | -0.00002200 |
| H | -1.10078900 | 0.14888700  | -0.93195500 |
| H | -1.10053100 | 0.73255900  | 0.59513600  |
| H | -1.10061700 | -0.88158800 | 0.33685400  |
| B | 0.91485100  | 0.00000800  | 0.00005600  |
| H | 1.25488700  | 1.09059800  | -0.41773000 |
| H | 1.25510900  | -0.90683300 | -0.73571600 |
| H | 1.25508900  | -0.18357100 | 1.15330800  |

### H<sub>2</sub>O

E<sub>solv</sub> = -76.431298 a.u.

Zero-point energy correction = 0.004028 a.u.

|   |            |             |             |
|---|------------|-------------|-------------|
| O | 0.00000000 | 0.00000000  | 0.11738100  |
| H | 0.00000000 | 0.75468100  | -0.47931400 |
| H | 0.00000000 | -0.75468100 | -0.47931400 |

### H<sub>2</sub>

E<sub>solv</sub> = -1.167911 a.u.

Zero-point energy correction = -0.001365 a.u.

|   |            |            |             |
|---|------------|------------|-------------|
| H | 0.88295500 | 0.20691800 | -0.30336900 |
| H | 0.14049500 | 0.20691800 | -0.30336900 |

### [NH<sub>3</sub>BH<sub>2</sub>(H<sub>2</sub>O)]<sup>+</sup>

E<sub>solv</sub> = -158.901811 a.u.

Zero-point energy correction = 0.061332 a.u.

|   |             |             |             |
|---|-------------|-------------|-------------|
| N | 1.25999500  | -0.25012300 | -0.00054100 |
| H | 1.31624900  | -0.85231800 | 0.82183400  |
| H | 2.10757500  | 0.31911100  | -0.00149300 |
| H | 1.31474100  | -0.85281000 | -0.82265800 |
| B | -0.01649300 | 0.69824000  | 0.00029400  |
| H | -0.05302500 | 1.31502700  | 1.02303600  |
| H | -0.05414100 | 1.31528000  | -1.02225400 |
| O | -1.22464500 | -0.30079000 | 0.00077100  |
| H | -1.78819600 | -0.28543400 | -0.78850900 |
| H | -1.78687700 | -0.28624300 | 0.79099800  |

### NH<sub>3</sub>BH<sub>2</sub>(OH)

E<sub>solv</sub> = -158.467008 a.u.

Zero-point energy correction = 0.050257 a.u.

|   |             |             |             |
|---|-------------|-------------|-------------|
| N | -0.64773300 | 0.04331000  | -0.04404300 |
| H | -0.92420200 | 0.24652100  | -1.00320900 |
| H | -1.04687400 | 0.77584200  | 0.54051000  |
| H | -1.09283400 | -0.83392800 | 0.21929500  |
| B | 1.02162900  | -0.00957200 | 0.13947900  |
| H | 1.36046200  | -0.89507600 | -0.63543600 |
| H | 1.15784200  | -0.32117100 | 1.31330400  |
| O | 1.53030300  | 1.30188500  | -0.12548000 |
| H | 1.69475500  | 1.41432000  | -1.06401000 |

### [NH<sub>3</sub>BH(OH)(H<sub>2</sub>O)]<sup>+</sup>

E<sub>solv</sub> = -234.182694 a.u.

Zero-point energy correction = 0.067221 a.u.

|   |             |             |             |
|---|-------------|-------------|-------------|
| N | 1.27637200  | -0.25380900 | 0.00693200  |
| H | 1.33221600  | -0.76389300 | 0.89088000  |
| H | 2.15632300  | 0.25272000  | -0.09587200 |
| H | 1.23553900  | -0.94158800 | -0.74525100 |
| B | 0.05464200  | 0.76945000  | -0.00258600 |
| H | -0.00995700 | 1.35166200  | -1.04741500 |
| O | -1.19598600 | -0.28448100 | -0.03167100 |
| H | -1.82901600 | -0.14454600 | -0.75311600 |
| H | -1.68476500 | -0.26937900 | 0.80868200  |
| O | 0.04275300  | 1.42321600  | 1.21672700  |
| H | -0.36381800 | 2.29234900  | 1.17569100  |

### NH<sub>3</sub>BH(OH)<sub>2</sub>

E<sub>solv</sub> = -233.747267 a.u.

Zero-point energy correction = 0.05327 a.u.

|   |             |            |             |
|---|-------------|------------|-------------|
| N | -0.70703200 | 0.06722200 | -0.08511600 |
| H | -0.93134800 | 0.30745400 | -1.04862600 |
| H | -1.08707100 | 0.80307700 | 0.50841700  |

|   |             |             |             |
|---|-------------|-------------|-------------|
| H | -1.20601200 | -0.79161500 | 0.13802300  |
| B | 1.00597500  | -0.04040800 | 0.21117000  |
| H | 1.33518300  | -0.94338700 | -0.55456700 |
| O | 1.50290200  | 1.26047700  | -0.08286000 |
| H | 1.70159200  | 1.34306800  | -1.01685100 |
| O | 1.11219700  | -0.31245300 | 1.60450500  |
| H | 1.05682000  | -1.25502200 | 1.76936000  |

### [NH<sub>3</sub>B(OH)<sub>2</sub>(H<sub>2</sub>O)]<sup>+</sup>

E<sub>solv</sub> = -309.465657 a.u.

Zero-point energy correction = 0.068703 a.u.

|   |             |             |             |
|---|-------------|-------------|-------------|
| N | 1.31031600  | -0.29210100 | 0.03074000  |
| H | 1.23363600  | -0.89017500 | 0.85402500  |
| H | 2.23293800  | 0.14369700  | 0.05709800  |
| H | 1.28351300  | -0.89397600 | -0.79295400 |
| B | 0.17917500  | 0.82668500  | -0.00849800 |
| O | -1.17526700 | -0.24003900 | -0.02807500 |
| H | -1.70869800 | -0.13000600 | -0.83019900 |
| H | -1.75373800 | -0.10491000 | 0.73833800  |
| O | 0.13356100  | 1.45807500  | 1.21702800  |
| H | -0.27852000 | 2.32598600  | 1.20856600  |
| O | 0.19234300  | 1.42728300  | -1.25033500 |
| H | -0.22268300 | 2.29312800  | -1.28313500 |

### NH<sub>3</sub>B(OH)<sub>3</sub>

E<sub>solv</sub> = -309.031998 a.u.

Zero-point energy correction = 0.057366 a.u.

|   |             |             |             |
|---|-------------|-------------|-------------|
| N | -0.82203000 | 0.14575500  | 0.03397900  |
| H | -1.14629100 | 0.42309300  | -0.89019900 |
| H | -1.08241900 | 0.88170900  | 0.68611100  |
| H | -1.33608500 | -0.69356700 | 0.29381800  |
| B | 0.88530300  | -0.09367100 | 0.08078200  |
| O | 1.46010000  | 1.16265100  | -0.27334300 |
| H | 1.45503900  | 1.25020100  | -1.22923000 |
| O | 1.19492600  | -0.39601200 | 1.44007900  |
| H | 1.01533200  | -1.32518000 | 1.60093500  |
| O | 1.00186500  | -1.16351900 | -0.87447200 |
| H | 1.92840000  | -1.40438000 | -0.95748400 |

### I<sup>-</sup>

E<sub>solv</sub> = -1110.987245 a.u.

Zero-point energy correction = 0.466617 a.u.

|    |             |             |             |
|----|-------------|-------------|-------------|
| Cu | 0.57876200  | -0.01674300 | -2.22880500 |
| N  | 0.12130800  | -0.02310000 | 0.54455700  |
| C  | -1.81284800 | 1.42400200  | 0.08142700  |
| C  | -1.29280300 | 0.13065500  | 0.26962800  |
| C  | 2.39971900  | -0.17610800 | 0.17677300  |
| C  | -0.94276600 | 2.66034600  | -0.02110300 |
| C  | -2.08786700 | -1.02307700 | 0.15506000  |
| C  | 2.16013500  | -0.37273100 | 1.68897300  |
| C  | 3.06866100  | 1.18322500  | -0.13781900 |
| C  | 1.01435800  | -0.09765800 | -0.39855500 |
| C  | 0.68332500  | -0.05362100 | 1.96733300  |
| C  | -1.51638700 | -2.42599200 | 0.12840800  |
| C  | -4.00698900 | 0.42251400  | -0.17500700 |
| C  | -3.45594600 | -0.84531500 | -0.05634700 |
| C  | 3.18507900  | -1.32952100 | -0.46511700 |
| C  | -3.18762100 | 1.54145600  | -0.12968300 |
| C  | -1.44274900 | 3.81934100  | 0.83598300  |
| C  | 0.48628100  | 1.29866600  | 2.63683300  |
| C  | -1.55857000 | -2.97106900 | -1.30019500 |
| C  | 2.47498600  | -2.67471800 | -0.44766200 |
| C  | -0.00264800 | -1.12368300 | 2.79755800  |
| C  | -2.22617000 | -3.37906900 | 1.08555700  |
| C  | -0.82033400 | 3.08767100  | -1.48433500 |
| C  | 4.52755800  | 1.27615700  | 0.28001200  |
| H  | 0.06649300  | 2.40788900  | 0.32124100  |
| H  | 2.49343300  | 1.98102700  | 0.35657700  |
| H  | 4.14722900  | -1.41394300 | 0.05785600  |
| H  | -1.79865500 | 3.35208800  | -1.90468200 |
| H  | -4.09701900 | -1.71999800 | -0.14708500 |
| H  | 2.98407000  | 1.37400300  | -1.21870900 |
| H  | 2.81262400  | 0.26996100  | 2.29072100  |

|   |             |             |             |
|---|-------------|-------------|-------------|
| H | -1.57083700 | 3.52655400  | 1.88444100  |
| H | 0.44424900  | -1.11919400 | 3.79759900  |
| H | 0.87309300  | 1.23469400  | 3.65950500  |
| H | 2.37827100  | -1.40606200 | 1.98260700  |
| H | 2.22866100  | -3.00210200 | 0.57050500  |
| H | 4.66753500  | 1.02886000  | 1.33939000  |
| H | -0.46024800 | -2.38055900 | 0.42173300  |
| H | -0.40188100 | 2.27993800  | -2.10491400 |
| H | 0.13496900  | -2.12620200 | 2.37924100  |
| H | 1.53940900  | -2.65017600 | -1.02297700 |
| H | 5.16241000  | 0.60460800  | -0.30743500 |
| H | -2.40459300 | 4.20417200  | 0.47601200  |
| H | 3.42176700  | -1.04979900 | -1.50352700 |
| H | -3.61973500 | 2.52924500  | -0.27686100 |
| H | -3.26670200 | -3.55076300 | 0.78448100  |
| H | -0.15992900 | 3.95753900  | -1.57814000 |
| H | 1.02871400  | 2.10300400  | 2.12883300  |
| H | -1.09247300 | -3.96252900 | -1.34700900 |
| H | -2.59179700 | -3.06344300 | -1.65745300 |
| H | -2.23389500 | -2.99730500 | 2.11266500  |
| H | -0.57557000 | 1.56393200  | 2.69909800  |
| H | -1.02540500 | -2.31149700 | -1.99962200 |
| H | -5.07632700 | 0.53788200  | -0.33342300 |
| H | -0.72662600 | 4.64802700  | 0.79947400  |
| H | 4.89802200  | 2.29468300  | 0.12928200  |
| H | -1.72271700 | -4.35255100 | 1.08730300  |
| H | 3.10621900  | -3.45111000 | -0.89035100 |
| H | -1.07443200 | -0.92245200 | 2.91072100  |

#### INT1

$E_{\text{solv}} = -1194.222687$  a.u.

Zero-point energy correction = 0.539578 a.u.

|    |             |             |             |
|----|-------------|-------------|-------------|
| Cu | -0.09444700 | 1.52054900  | -1.11424700 |
| N  | 0.46612600  | -0.74933900 | 0.42752800  |
| C  | -1.59939800 | -0.15101000 | 1.61524000  |
| C  | -0.97466900 | -0.83608900 | 0.55752900  |
| C  | 2.50676100  | 0.14754800  | -0.14474400 |
| C  | -0.84868900 | 0.74562300  | 2.57980600  |
| C  | -1.70844800 | -1.50093500 | -0.44024100 |
| C  | 2.77658300  | -1.22132900 | 0.52005400  |
| C  | 2.93381600  | 1.32780400  | 0.75927800  |
| C  | 1.01055300  | 0.23453700  | -0.23538300 |
| C  | 1.43225000  | -1.75221100 | 1.04654500  |
| C  | -1.08225900 | -2.06005100 | -1.70187600 |
| C  | -3.73423500 | -0.92572700 | 0.76362900  |
| C  | -3.09722600 | -1.54258200 | -0.30338700 |
| C  | 3.13673000  | 0.27814100  | -1.53888700 |
| C  | -2.99051500 | -0.22253900 | 1.70111800  |
| C  | -1.22753500 | 0.49809500  | 4.03683700  |
| C  | 1.34075200  | -1.72882400 | 2.56591900  |
| C  | -1.44240800 | -1.18229000 | -2.90200600 |
| C  | 2.55910600  | -0.66274100 | -2.58521500 |
| C  | 1.12461100  | -3.15808500 | 0.55722800  |
| C  | -1.47295700 | -3.51239700 | -1.96022500 |
| C  | -1.05164800 | 2.21522000  | 2.20723700  |
| C  | 4.43736600  | 1.49109800  | 0.91346400  |
| H  | 0.22201500  | 0.54382000  | 2.47974700  |
| H  | 2.47362600  | 1.19298100  | 1.75092600  |
| H  | 4.21749700  | 0.10576200  | -1.44250000 |
| H  | -2.11604700 | 2.48390500  | 2.20052600  |
| H  | -3.69076200 | -2.05063600 | -1.06112900 |
| H  | 2.50238700  | 2.25372600  | 0.34824400  |
| H  | 3.50253700  | -1.13825200 | 1.33722500  |
| H  | -1.12837300 | -0.55942800 | 4.30841200  |
| H  | 1.83736900  | -3.85008600 | 1.01868800  |
| H  | 2.00777500  | -2.50113600 | 2.96395000  |
| H  | 3.19982700  | -1.92790900 | -0.20367700 |
| H  | 2.63937800  | -1.71589600 | -2.28490700 |
| H  | 4.91672200  | 0.56664700  | 1.25843400  |
| H  | 0.00815000  | -2.02068200 | -1.59794100 |
| H  | -0.64275600 | 2.42734300  | 1.20781900  |

|   |             |             |             |
|---|-------------|-------------|-------------|
| H | 1.23070200  | -3.25146500 | -0.52879100 |
| H | 1.49769400  | -0.45180400 | -2.77609700 |
| H | 4.91298300  | 1.78193300  | -0.02932300 |
| H | -2.26049100 | 0.80222400  | 4.24573000  |
| H | 3.01625100  | 1.31972500  | -1.87509100 |
| H | -3.50085100 | 0.30010400  | 2.50776900  |
| H | -2.54469900 | -3.61000700 | -2.17223700 |
| H | -0.53688400 | 2.86718900  | 2.92292000  |
| H | 1.65826100  | -0.77127100 | 2.99179700  |
| H | -0.97446600 | -1.57100400 | -3.81460500 |
| H | -2.52751500 | -1.14965300 | -3.06238800 |
| H | -1.24178300 | -4.15451400 | -1.10252200 |
| H | 0.32519100  | -1.95764500 | 2.91068700  |
| H | -1.09793300 | -0.14611100 | -2.76260200 |
| H | -4.81702200 | -0.97099400 | 0.85092800  |
| H | -0.57712600 | 1.08203700  | 4.69791200  |
| H | 4.66092600  | 2.27043700  | 1.64859200  |
| H | -0.93114100 | -3.89883800 | -2.83111000 |
| H | 3.08735100  | -0.55872900 | -3.53799200 |
| H | 0.11569400  | -3.47413300 | 0.84904700  |
| B | -1.63075600 | 2.74154700  | -2.00182200 |
| H | -0.41411500 | 2.72061300  | -2.32125100 |
| H | -1.95035800 | 1.92160300  | -1.13161900 |
| H | -2.27466000 | 2.56450200  | -2.99947200 |
| N | -1.91186300 | 4.20237100  | -1.41138100 |
| H | -2.89670200 | 4.31909800  | -1.17432200 |
| H | -1.38036200 | 4.41094000  | -0.56616300 |
| H | -1.68665100 | 4.93319400  | -2.08589100 |

#### TS1

$E_{\text{solv}} = -1270.604187$  a.u.

Zero-point energy correction = 0.55373 a.u.

|    |             |             |             |
|----|-------------|-------------|-------------|
| Cu | 0.35862700  | -1.09318700 | -1.49672200 |
| N  | -1.02064700 | 0.38728300  | 0.49977800  |
| C  | 1.07496800  | 0.20773400  | 1.77379200  |
| C  | 0.28056100  | 0.91343100  | 0.85123700  |
| C  | -2.58739400 | -0.91514500 | -0.56154800 |
| C  | 0.67104600  | -1.12783100 | 2.36492800  |
| C  | 0.74923400  | 2.06450800  | 0.19167100  |
| C  | -3.34951100 | 0.06849000  | 0.35278900  |
| C  | -2.62853200 | -2.36551100 | -0.02454800 |
| C  | -1.14797200 | -0.49172700 | -0.46051100 |
| C  | -2.30414200 | 0.78564700  | 1.22065900  |
| C  | 0.01251400  | 2.71937700  | -0.95965000 |
| C  | 2.79110200  | 1.90456000  | 1.49458600  |
| C  | 2.01016500  | 2.55054700  | 0.54554700  |
| C  | -3.05645400 | -0.86852000 | -2.02299800 |
| C  | 2.33419400  | 0.73123800  | 2.08294100  |
| C  | 0.82807200  | -1.17242400 | 3.88210800  |
| C  | -2.29299000 | 0.28901700  | 2.66002200  |
| C  | 0.73121200  | 2.41882500  | -2.27623100 |
| C  | -2.76738900 | 0.44069400  | -2.74217600 |
| C  | -2.47835500 | 2.29522700  | 1.22634000  |
| C  | -0.16246000 | 4.22347200  | -0.77163900 |
| C  | 1.45324100  | -2.26277200 | 1.70397600  |
| C  | -3.98688600 | -3.04040300 | -0.12880900 |
| H  | -0.38453400 | -1.30023700 | 2.13525300  |
| H  | -2.30040800 | -2.36106800 | 1.02662200  |
| H  | -4.13619200 | -1.07169400 | -2.04301900 |
| H  | 2.53493100  | -2.14495600 | 1.85681400  |
| H  | 2.39500500  | 3.44011700  | 0.05080600  |
| H  | -1.87919900 | -2.95806500 | -0.57197900 |
| H  | -4.08757200 | -0.44303800 | 0.98149900  |
| H  | 0.30758800  | -0.34115100 | 4.37186600  |
| H  | -3.41866800 | 2.53360900  | 1.73533000  |
| H  | -3.21112500 | 0.62995700  | 3.15060500  |
| H  | -3.90205300 | 0.80230100  | -0.24622500 |
| H  | -3.22090100 | 1.30323000  | -2.23635800 |
| H  | -4.77623000 | -2.45056700 | 0.35327400  |
| H  | -0.98466300 | 2.27039300  | -1.03659800 |

|   |             |             |             |
|---|-------------|-------------|-------------|
| H | 1.26544000  | -2.29972100 | 0.62019700  |
| H | -2.53656600 | 2.71131800  | 0.21521200  |
| H | -1.68707100 | 0.62846900  | -2.81634000 |
| H | -4.28102900 | -3.20273500 | -1.17128400 |
| H | 1.88222500  | -1.12999300 | 4.18244300  |
| H | -2.57372500 | -1.69663800 | -2.56502600 |
| H | 2.96780900  | 0.20609600  | 2.79524600  |
| H | 0.80063400  | 4.74810100  | -0.79003400 |
| H | 1.15686200  | -3.22873800 | 2.12966900  |
| H | -2.27099600 | -0.80386700 | 2.72818600  |
| H | 0.18122100  | 2.85068500  | -3.12093600 |
| H | 1.74424400  | 2.84252300  | -2.28336200 |
| H | -0.65439700 | 4.46075100  | 0.17839400  |
| H | -1.44545900 | 0.70116300  | 3.22051200  |
| H | 0.80945500  | 1.33351800  | -2.44905300 |
| H | 3.76950200  | 2.29974800  | 1.75629300  |
| H | 0.41595000  | -2.10956600 | 4.27308900  |
| H | -3.96283400 | -4.01847600 | 0.36183400  |
| H | -0.77294200 | 4.63441500  | -1.58381200 |
| H | -3.16496700 | 0.42098600  | -3.76174100 |
| H | -1.66861700 | 2.79269400  | 1.77406700  |
| B | 3.49902400  | -1.75813200 | -1.63026900 |
| H | 1.60197900  | -1.49952700 | -2.32136400 |
| H | 3.74399100  | -1.92537100 | -2.77608700 |
| H | 3.10112600  | -2.57146900 | -0.86985300 |
| N | 3.53868700  | -0.26367700 | -1.14095100 |
| H | 3.00044300  | 0.33540600  | -1.76743600 |
| H | 3.16501700  | -0.12920600 | -0.19483000 |
| H | 4.49895000  | 0.08413700  | -1.13355300 |
| O | 5.43632300  | -2.12111600 | -1.08979700 |
| H | 5.73792900  | -2.10911800 | -0.17383500 |
| H | 6.18234500  | -1.84826800 | -1.63654600 |

## TS2

$E_{\text{solv}} = -1270.615174$  a.u.

Zero-point energy correction = 0.55335 a.u.

|    |             |             |             |
|----|-------------|-------------|-------------|
| Cu | -0.95195300 | 1.53229100  | -0.23300300 |
| N  | 0.14929200  | -1.05856200 | 0.17810300  |
| C  | 1.99079600  | -0.35757200 | -1.29055300 |
| C  | 1.46100600  | -0.47034300 | 0.00902100  |
| C  | -2.14938700 | -1.20999600 | 0.20140200  |
| C  | 1.21681500  | -0.72798500 | -2.54055500 |
| C  | 2.12807300  | 0.04721400  | 1.13412000  |
| C  | -1.59416200 | -2.58639900 | 0.62833300  |
| C  | -2.78324400 | -1.24671600 | -1.20957600 |
| C  | -0.93327400 | -0.33570000 | 0.07490000  |
| C  | -0.06815400 | -2.54435900 | 0.44345300  |
| C  | 1.49524400  | 0.14367700  | 2.50774700  |
| C  | 3.96626100  | 0.66949600  | -0.32313800 |
| C  | 3.39549100  | 0.60108500  | 0.93970000  |
| C  | -3.13397400 | -0.60929800 | 1.21631700  |
| C  | 3.25773000  | 0.21457500  | -1.42732700 |
| C  | 2.01742700  | -1.61526500 | -3.48973000 |
| C  | 0.40679800  | -3.37869600 | -0.73768300 |
| C  | 1.16629900  | 1.60297700  | 2.82844300  |
| C  | -2.52544900 | -0.26295300 | 2.56668000  |
| C  | 0.68445900  | -2.98330600 | 1.68836700  |
| C  | 2.36679000  | -0.46205900 | 3.60436900  |
| C  | 0.73129200  | 0.53074700  | -3.26131800 |
| C  | -4.09317400 | -2.01361100 | -1.29389800 |
| H  | 0.32253700  | -1.28404300 | -2.24200900 |
| H  | -2.05509900 | -1.68367200 | -1.91073400 |
| H  | -3.95890200 | -1.32155400 | 1.35472900  |
| H  | 1.57302100  | 1.16876000  | -3.56153700 |
| H  | 3.93329900  | 1.00789400  | 1.79383500  |
| H  | -2.94139400 | -0.21002200 | -1.54571200 |
| H  | -2.02959900 | -3.40107600 | 0.03820100  |
| H  | 2.41253000  | -2.50396400 | -2.98420300 |
| H  | 0.49219600  | -4.04920700 | 1.85198000  |
| H  | 0.26845200  | -4.43689100 | -0.49067000 |
| H  | -1.83712400 | -2.79462100 | 1.67708600  |

|   |             |             |             |
|---|-------------|-------------|-------------|
| H | -2.05966800 | -1.13307500 | 3.04754300  |
| H | -3.99676400 | -3.03523700 | -0.90625300 |
| H | 0.54272000  | -0.39957900 | 2.49313900  |
| H | 0.06583100  | 1.12792700  | -2.62137100 |
| H | 0.35346600  | -2.44656900 | 2.58377900  |
| H | -1.75768000 | 0.51783800  | 2.47553500  |
| H | -4.89164200 | -1.51704400 | -0.73231300 |
| H | 2.86530200  | -1.07619600 | -3.92981500 |
| H | -3.57619400 | 0.29656200  | 0.77104900  |
| H | 3.68951100  | 0.31681000  | -2.42099300 |
| H | 3.29666100  | 0.10433400  | 3.73747800  |
| H | 0.17200000  | 0.26029700  | -4.16466500 |
| H | -0.16196200 | -3.17821000 | -1.65169400 |
| H | 0.66672800  | 1.67661300  | 3.80191800  |
| H | 2.07532900  | 2.21692800  | 2.86667600  |
| H | 2.63707700  | -1.50127700 | 3.38593700  |
| H | 1.47369000  | -3.22141200 | -0.93612000 |
| H | 0.49965800  | 2.03956200  | 2.07163400  |
| H | 4.95337600  | 1.10614000  | -0.45206700 |
| H | 1.38013800  | -1.94923800 | -4.31644300 |
| H | -4.42176900 | -2.08801600 | -2.33519800 |
| H | 1.83333000  | -0.44294500 | 4.56165000  |
| H | -3.29049700 | 0.11267000  | 3.25323300  |
| H | 1.76720800  | -2.85451400 | 1.57056900  |
| B | -1.10124700 | 3.59519600  | -2.53516000 |
| H | -1.03088600 | 3.14932900  | 0.63732100  |
| H | -1.27247800 | 2.85031400  | -1.46389500 |
| H | -0.89277300 | 4.74534100  | -0.69214000 |
| N | 1.17960900  | 3.22306400  | -0.71497500 |
| H | 1.68725400  | 2.34038500  | -0.77611900 |
| H | 1.38794800  | 3.72812500  | -1.57275600 |
| H | 1.60664400  | 3.74592600  | 0.04577300  |
| O | -3.13975100 | 3.74085100  | -0.28468800 |
| H | -3.52701300 | 4.15761700  | -1.06515000 |
| H | -3.34786700 | 4.33516800  | 0.44761500  |

## TS3

$E_{\text{solv}} = -1270.614578$  a.u.

Zero-point energy correction = 0.558674 a.u.

|    |             |             |             |
|----|-------------|-------------|-------------|
| Cu | 2.14419100  | -0.83173700 | -1.25269600 |
| N  | -0.76959600 | 0.45783200  | 0.57836300  |
| C  | -2.72421500 | -0.30617700 | -0.69792400 |
| C  | -1.64939400 | -0.61412900 | 0.15843800  |
| C  | 0.90231800  | 2.02382500  | 0.50522700  |
| C  | -2.92874200 | 1.06053800  | -1.32302800 |
| C  | -1.39516500 | -1.93162600 | 0.57829700  |
| C  | -0.03675100 | 2.41737700  | 1.67096000  |
| C  | 0.82937800  | 3.04718500  | -0.65401400 |
| C  | 0.31412100  | 0.76485100  | -0.08429800 |
| C  | -1.06727400 | 1.28916000  | 1.82836300  |
| C  | -0.13768400 | -2.34172300 | 1.31568000  |
| C  | -3.39878000 | -2.63437700 | -0.59535800 |
| C  | -2.29843700 | -2.92596000 | 0.19645500  |
| C  | 2.36616300  | 1.82319600  | 0.92181300  |
| C  | -3.59240200 | -1.33927100 | -1.05404600 |
| C  | -4.34671000 | 1.59433300  | -1.13395100 |
| C  | -2.49445400 | 1.80903200  | 1.84949400  |
| C  | 0.75432900  | -3.17054300 | 0.38924400  |
| C  | 2.61223800  | 0.84481100  | 2.05832800  |
| C  | -0.84621900 | 0.43433800  | 3.06776800  |
| C  | -0.41835700 | -3.11385500 | 2.60180900  |
| C  | -2.57802000 | 1.01980700  | -2.81109600 |
| C  | 1.33091500  | 4.44281400  | -0.31757100 |
| H  | -2.23628800 | 1.76668700  | -0.84873200 |
| H  | -0.21840400 | 3.10712500  | -0.99164200 |
| H  | 2.78140900  | 2.80002600  | 1.20434600  |
| H  | -3.26529800 | 0.36121300  | -3.35741900 |
| H  | -2.12224700 | -3.95224000 | 0.51379800  |
| H  | 1.39818800  | 2.64382700  | -1.50631100 |
| H  | -0.55773000 | 3.35516900  | 1.44011700  |
| H  | -4.64959000 | 1.59975800  | -0.08102100 |

|   |             |             |             |
|---|-------------|-------------|-------------|
| H | -1.01608600 | 1.05112300  | 3.95740500  |
| H | -2.63860400 | 2.37830500  | 2.77469400  |
| H | 0.50556400  | 2.58575000  | 2.60843700  |
| H | 2.18515500  | 1.20063600  | 3.00329800  |
| H | 0.84180300  | 4.84999900  | 0.57595300  |
| H | 0.41861000  | -1.43513600 | 1.58203400  |
| H | -1.56174400 | 0.64571500  | -2.97837200 |
| H | 0.17110400  | 0.03394400  | 3.12609700  |
| H | 2.19122700  | -0.14876200 | 1.85347200  |
| H | 2.41198300  | 4.45975900  | -0.14228100 |
| H | -5.07777800 | 0.99297900  | -1.68807400 |
| H | 2.92548600  | 1.50534700  | 0.02523500  |
| H | -4.42997700 | -1.12416400 | -1.71511400 |
| H | -0.91053700 | -4.07225100 | 2.39541100  |
| H | -2.65283000 | 2.02244100  | -3.24868300 |
| H | -2.70341300 | 2.48402200  | 1.01370100  |
| H | 1.72715800  | -3.36632600 | 0.85676200  |
| H | 0.29101800  | -4.13627800 | 0.15039500  |
| H | -1.06115800 | -2.55003300 | 3.28697400  |
| H | -3.22543100 | 0.99171300  | 1.84598900  |
| H | 0.92746300  | -2.65682900 | -0.57114500 |
| H | -4.09192000 | -3.42291900 | -0.87823400 |
| H | -4.41575100 | 2.62028400  | -1.51417200 |
| H | 1.12503400  | 5.12975600  | -1.14464900 |
| H | 0.52125100  | -3.33361300 | 3.12202300  |
| H | 3.68707800  | 0.70964600  | 2.22410600  |
| H | -1.55817800 | -0.39899500 | 3.10130400  |
| B | 4.03324900  | -1.63595100 | -0.66945400 |
| H | 3.19886400  | -1.08933300 | 0.09454100  |
| H | 3.65476300  | -1.81136900 | -1.83379800 |
| H | 4.33315000  | -2.68508000 | -0.16784700 |
| N | 5.30345600  | -0.65958300 | -0.71867200 |
| H | 6.07516800  | -1.08682800 | -1.23029600 |
| H | 5.11168800  | 0.23221000  | -1.17497800 |
| H | 5.65735700  | -0.44466000 | 0.21329700  |
| O | 0.70305600  | -0.44177500 | -2.60414300 |
| H | 1.00871800  | 0.10859600  | -3.33765800 |
| H | 0.35331100  | 0.16373000  | -1.89174500 |

#### TS4

$E_{\text{solv}} = -1194.134085$  a.u.

Zero-point energy correction = 0.528421 a.u.

|    |             |             |             |
|----|-------------|-------------|-------------|
| Cu | -0.18785300 | -0.77539700 | 1.85752200  |
| N  | -0.09294700 | -0.00758800 | -0.77974400 |
| C  | 2.03182000  | 1.21944100  | -0.41912000 |
| C  | 1.32017800  | 0.00668700  | -0.43981700 |
| C  | -2.38790700 | -0.13595700 | -0.50907000 |
| C  | 1.40171500  | 2.57973300  | -0.63645400 |
| C  | 1.93234500  | -1.21735600 | -0.08935900 |
| C  | -2.04478500 | -0.58348700 | -1.94514500 |
| C  | -3.06821200 | 1.25854400  | -0.48547900 |
| C  | -1.02517100 | -0.02520500 | 0.14122100  |
| C  | -0.59727300 | -0.16551300 | -2.21624500 |
| C  | 1.17627900  | -2.52712300 | 0.04316200  |
| C  | 4.02333000  | -0.02769500 | 0.20003200  |
| C  | 3.29091000  | -1.20570000 | 0.22513200  |
| C  | -3.29089100 | -1.14815300 | 0.21907800  |
| C  | 3.39246700  | 1.16723000  | -0.10655200 |
| C  | 2.03550800  | 3.32710300  | -1.80970400 |
| C  | -0.48715400 | 1.14110100  | -2.98683700 |
| C  | 1.04747500  | -2.95099000 | 1.51264900  |
| C  | -2.64823600 | -2.47422800 | 0.59200500  |
| C  | 0.19270800  | -1.23716600 | -2.94587300 |
| C  | 1.82386300  | -3.66930600 | -0.73876400 |
| C  | 1.50852900  | 3.43233600  | 0.63042900  |
| C  | -4.43753200 | 1.30493900  | -1.14476000 |
| H  | 0.33391000  | 2.43755500  | -0.84720200 |
| H  | -2.40496300 | 1.99304600  | -0.96369100 |
| H  | -4.15355600 | -1.33867700 | -0.43358100 |
| H  | 2.55394000  | 3.67976900  | 0.85268900  |
| H  | 3.78258300  | -2.13689500 | 0.49851000  |

|   |             |             |             |
|---|-------------|-------------|-------------|
| H | -3.16192600 | 1.57701100  | 0.55906300  |
| H | -2.72447700 | -0.15613800 | -2.68970300 |
| H | 2.05861400  | 2.73058600  | -2.72818900 |
| H | -0.21568200 | -1.33356300 | -3.95768300 |
| H | -0.92484300 | 0.99038400  | -3.97962100 |
| H | -2.13138500 | -1.67488400 | -2.02748800 |
| H | -2.14417000 | -2.95735200 | -0.25560000 |
| H | -4.41325000 | 0.97921000  | -2.19120500 |
| H | 0.16497000  | -2.39746500 | -0.35904900 |
| H | 1.08582900  | 2.91945800  | 1.50102400  |
| H | 0.10438400  | -2.21568700 | -2.46312200 |
| H | -1.90788100 | -2.35511100 | 1.39918100  |
| H | -5.16834900 | 0.68323400  | -0.61658000 |
| H | 3.06980700  | 3.61164700  | -1.57980300 |
| H | -3.69153700 | -0.67337800 | 1.12619000  |
| H | 3.96421700  | 2.09282600  | -0.08901000 |
| H | 2.80913900  | -3.92842700 | -0.33485600 |
| H | 0.96641700  | 4.37565800  | 0.49363800  |
| H | -1.02269900 | 1.96707600  | -2.50852300 |
| H | 0.32557400  | -3.76506500 | 1.63252900  |
| H | 2.01553000  | -3.28656700 | 1.90585700  |
| H | 1.95326300  | -3.40608700 | -1.79382600 |
| H | 0.55847300  | 1.43005500  | -3.13007200 |
| H | 0.79033900  | -2.16651000 | 2.28063600  |
| H | 5.08336100  | -0.03979800 | 0.43959500  |
| H | 1.47947100  | 4.24897200  | -2.01526200 |
| H | -4.81640400 | 2.33179600  | -1.13454500 |
| H | 1.19767700  | -4.56654800 | -0.68282000 |
| H | -3.39823500 | -3.17768700 | 0.96586800  |
| H | 1.25295700  | -0.97330100 | -3.03733000 |
| B | -1.01046300 | 1.10831000  | 1.98519100  |
| H | -0.92413200 | 2.04791200  | 1.25346300  |
| H | -2.05952400 | 0.73633600  | 2.43017100  |
| H | 0.05522300  | 0.80568500  | 2.57540000  |
| N | -1.02150300 | 2.86068300  | 3.82885000  |
| H | -0.22940100 | 3.49598800  | 3.79837100  |
| H | -1.84553700 | 3.42098400  | 3.63278300  |
| H | -1.10631700 | 2.55185300  | 4.79277300  |

#### TSS

$E_{\text{solv}} = -1194.141054$  a.u.

Zero-point energy correction = 0.53753 a.u.

|    |             |             |             |
|----|-------------|-------------|-------------|
| Cu | -0.75533800 | 0.64022000  | -2.06198900 |
| N  | -0.02248900 | -0.13332900 | 0.59478700  |
| C  | 2.26045100  | -0.95601700 | -0.01267300 |
| C  | 1.37234400  | 0.11198400  | 0.21687200  |
| C  | -2.35116400 | -0.08611700 | 0.42105100  |
| C  | 1.93602700  | -2.41553300 | 0.21852900  |
| C  | 1.78836600  | 1.45521600  | 0.06196100  |
| C  | -1.97371500 | 0.12955900  | 1.89946700  |
| C  | -3.11178600 | -1.41619200 | 0.20149800  |
| C  | -0.99953800 | -0.11824700 | -0.28106200 |
| C  | -0.50423000 | -0.26235400 | 2.05501800  |
| C  | 0.95845300  | 2.67967000  | 0.40230400  |
| C  | 3.96436700  | 0.64726200  | -0.65724200 |
| C  | 3.08925200  | 1.68610600  | -0.38874200 |
| C  | -3.23141000 | 1.05748900  | -0.13281400 |
| C  | 3.55087700  | -0.65808200 | -0.45476300 |
| C  | 2.73166700  | -2.96233400 | 1.40677600  |
| C  | -0.35559300 | -1.69775100 | 2.54584800  |
| C  | 0.75055500  | 3.60248300  | -0.79790800 |
| C  | -2.65803900 | 2.46485000  | -0.12431300 |
| C  | 0.26416500  | 0.65209200  | 2.98546500  |
| C  | 1.61022200  | 3.47883800  | 1.53577200  |
| C  | 2.21607300  | -3.27798900 | -1.01542000 |
| C  | -4.50536500 | -1.47899200 | 0.81135300  |
| H  | 0.87024100  | -2.49276800 | 0.47917200  |
| H  | -2.52016500 | -2.23882500 | 0.63007700  |
| H  | -4.15026400 | 1.05374100  | 0.46746400  |
| H  | 3.29250000  | -3.36867000 | -1.19527700 |
| H  | 3.42236200  | 2.71290000  | -0.52274300 |

|                                              |             |             |             |    |             |             |             |
|----------------------------------------------|-------------|-------------|-------------|----|-------------|-------------|-------------|
| H                                            | -3.20986300 | -1.58380900 | -0.88187200 | H  | -1.05853600 | 1.32173900  | -2.33416800 |
| H                                            | -2.60320500 | -0.45700700 | 2.57701700  | H  | -3.82644200 | 3.55701100  | -1.45122500 |
| H                                            | 2.64835700  | -2.32135300 | 2.29185700  | H  | -6.66474500 | -1.06091700 | -2.64787500 |
| H                                            | -0.09572600 | 0.47962000  | 4.00526900  | H  | -6.08735100 | 3.13172700  | 0.77350100  |
| H                                            | -0.80935500 | -1.75492000 | 3.54107600  | H  | -6.24657500 | 2.67210100  | -1.55381900 |
| H                                            | -2.10691700 | 1.18146000  | 2.17757700  | H  | -3.50990500 | 3.65759700  | 0.27483700  |
| H                                            | -2.33839500 | 2.78762800  | 0.87450600  | H  | -2.26606600 | 3.09012800  | 1.93522300  |
| H                                            | -4.50555500 | -1.19888300 | 1.87088300  | H  | -2.01392300 | 4.23327100  | -2.67374300 |
| H                                            | -0.03198200 | 2.35232500  | 0.74179300  | H  | -3.61808100 | 0.88496300  | 2.29825000  |
| H                                            | 1.78258600  | -2.85972100 | -1.93258900 | H  | -2.40073500 | -1.73832200 | -2.25793800 |
| H                                            | 0.10303900  | 1.70793300  | 2.75546200  | H  | -4.86354000 | 2.41453000  | 1.82562400  |
| H                                            | -1.80430500 | 2.57110800  | -0.80537500 | H  | -1.39005000 | 1.54659100  | 1.93192000  |
| H                                            | -5.21342400 | -0.82953600 | 0.28855600  | H  | -0.35617300 | 3.70698700  | -2.34256800 |
| H                                            | 3.79691800  | -3.02755500 | 1.15535700  | H  | -6.00780300 | -2.65430600 | -3.05591000 |
| H                                            | -3.53532600 | 0.79214200  | -1.15783800 | H  | -0.18591300 | 2.17885800  | -0.15951500 |
| H                                            | 4.24569400  | -1.47333400 | -0.64318000 | H  | -5.43594300 | -3.55096000 | -1.10666200 |
| H                                            | 2.52733000  | 3.96934100  | 1.18805000  | H  | -5.09853100 | -0.78550100 | 4.39366200  |
| H                                            | 1.83668700  | -4.29688200 | -0.86796800 | H  | -3.20038600 | -1.85864100 | -3.83136000 |
| H                                            | -0.86986300 | -2.42988700 | 1.91506000  | H  | -5.11221800 | 1.63724800  | -2.42518400 |
| H                                            | 0.09716400  | 4.43689500  | -0.51421800 | H  | -2.15224200 | -0.00307200 | 4.05809200  |
| H                                            | 1.70180500  | 4.03021000  | -1.13763100 | H  | -2.73074300 | -1.65294000 | 3.74863100  |
| H                                            | 1.87793400  | 2.85544500  | 2.39498600  | H  | -5.82451500 | 0.54080800  | 3.47120000  |
| H                                            | 0.69122200  | -1.99145600 | 2.65148200  | H  | -6.32574400 | 0.91949600  | -1.32681700 |
| H                                            | 0.29480900  | 3.07840100  | -1.64615000 | H  | -1.80567700 | -0.79089500 | 2.50632200  |
| H                                            | 4.97123600  | 0.85495900  | -1.00961700 | H  | -5.60700200 | -4.15413700 | 1.28056400  |
| H                                            | 2.38690500  | -3.96856100 | 1.67132800  | H  | -5.63601300 | -1.26328100 | -4.07971100 |
| H                                            | -4.88852500 | -2.50135200 | 0.74315600  | H  | -1.11914100 | 3.30623600  | -3.88560100 |
| H                                            | 0.92752400  | 4.26488100  | 1.87964000  | H  | -4.47463600 | 0.85750800  | 4.57901000  |
| H                                            | -3.42175900 | 3.17404600  | -0.45857900 | H  | -0.51775800 | 3.06400900  | 2.16488800  |
| H                                            | 1.33934400  | 0.43538700  | 2.97138400  | H  | -6.19764900 | 1.41413600  | 1.18525400  |
| B                                            | -0.78669500 | -1.43886900 | -2.29353100 | B  | -0.23700400 | -2.54960200 | -0.05631600 |
| H                                            | 0.32739400  | -1.22813500 | -2.68450800 | H  | 0.03038400  | -1.64999400 | -0.90479700 |
| H                                            | -1.75851500 | -1.15132800 | -2.93343000 | H  | -1.27706400 | -2.32804600 | 0.57763900  |
| H                                            | -0.67182200 | 1.71569000  | -3.15990500 | H  | 0.62847100  | -2.67747200 | 0.81398800  |
| N                                            | -0.93135800 | -2.84279400 | -1.63526800 | N  | -0.40218000 | -3.89596800 | -0.86023400 |
| H                                            | -1.80743900 | -2.99065400 | -1.12952300 | H  | -0.60842200 | -4.68127200 | -0.24037900 |
| H                                            | -0.93567200 | -3.52619900 | -2.40052600 | H  | -1.16266100 | -3.85873200 | -1.54177800 |
| H                                            | -0.15964200 | -3.11808900 | -1.02338100 | H  | 0.44184300  | -4.14822600 | -1.37863700 |
| <b>INT2</b>                                  |             |             |             | Cu | 1.66968200  | -1.50915000 | -0.06518500 |
| $E_{\text{rel}} = -2305.25595$ a.u.          |             |             |             | N  | 3.99890500  | 0.20067300  | 0.12446400  |
| Zero-point energy correction = 1.029203 a.u. |             |             |             | C  | 2.93152600  | 2.16762800  | -0.88447800 |
| Cu                                           | -1.48484700 | -0.77068100 | -0.21805300 | C  | 3.21277700  | 1.40669700  | 0.26491300  |
| N                                            | -3.85884800 | 0.65766500  | -0.11054200 | C  | 4.59138500  | -1.99104300 | -0.27326800 |
| C                                            | -4.72831700 | -1.55537700 | -0.74088700 | C  | 3.13422200  | 1.62523900  | -2.28432100 |
| C                                            | -4.39230400 | -0.63662400 | 0.27035100  | C  | 2.78654000  | 1.79790200  | 1.54543600  |
| C                                            | -2.25697600 | 2.18379400  | -0.75523600 | C  | 5.88265000  | -1.23369700 | 0.09693400  |
| C                                            | -4.53517500 | -1.27632500 | -2.21816900 | C  | 4.53585800  | -2.34824700 | -1.77850900 |
| C                                            | -4.41459400 | -0.98140000 | 1.63395300  | C  | 3.49342300  | -0.98298300 | -0.06624100 |
| C                                            | -3.58217100 | 2.95821700  | -0.56607900 | C  | 5.52677300  | 0.25775100  | 0.19556400  |
| C                                            | -1.82842800 | 2.10411200  | -2.23740800 | C  | 2.82438100  | 0.86613200  | 2.73880900  |
| C                                            | -2.58290700 | 0.78256400  | -0.34387500 | C  | 2.00439400  | 3.87426700  | 0.56657700  |
| C                                            | -4.68981500 | 1.92291800  | -0.29663300 | C  | 2.19773700  | 3.05735000  | 1.67176100  |
| C                                            | -3.86804600 | -0.09015900 | 2.73144200  | C  | 4.35334300  | -3.24257600 | 0.58491800  |
| C                                            | -5.25667300 | -3.16531800 | 0.99530800  | C  | 2.33255400  | 3.41488900  | -0.70217100 |
| C                                            | -4.86934800 | -2.25738900 | 1.97067800  | C  | 3.70500700  | 2.64581400  | -3.26223300 |
| C                                            | -1.11006300 | 2.71653700  | 0.11489900  | C  | 6.09493500  | 1.07934800  | -0.95160100 |
| C                                            | -5.16955000 | -2.81965000 | -0.34610500 | C  | 1.42106400  | 0.29864500  | 2.97279300  |
| C                                            | -5.78372900 | -1.58074300 | -3.04135900 | C  | 4.10485900  | -2.97017300 | 2.06082200  |
| C                                            | -5.64083600 | 1.76304400  | -1.47423900 | C  | 5.96274000  | 0.87198100  | 1.51536400  |
| C                                            | -2.56697400 | -0.66911900 | 3.29121400  | C  | 3.35439700  | 1.51998700  | 4.01039300  |
| C                                            | -1.33995500 | 2.59690900  | 1.61251800  | C  | 1.80815900  | 1.06873300  | -2.80707100 |
| C                                            | -5.49794000 | 2.22628900  | 0.95337400  | C  | 5.50498200  | -3.43948400 | -2.20391500 |
| C                                            | -4.87741200 | 0.14252100  | 3.85247100  | H  | 3.83412400  | 0.78410500  | -2.23448400 |
| C                                            | -3.33220800 | -2.04964900 | -2.76012500 | H  | 4.73008400  | -1.43552400 | -2.36254800 |
| C                                            | -1.30262000 | 3.40955800  | -2.81121900 | H  | 5.22619500  | -3.90034300 | 0.47555100  |
| H                                            | -4.30709500 | -0.21396300 | -2.34555100 | H  | 1.06884800  | 1.87346100  | -2.91988300 |
| H                                            | -2.68770000 | 1.75731100  | -2.83243600 | H  | 1.87717900  | 3.39804900  | 2.65474600  |
| H                                            | -0.94008700 | 3.76957400  | -0.15006700 | H  | 3.50665600  | -2.65248800 | -2.02769800 |
| H                                            | -3.45760500 | -3.13146100 | -2.62001900 | H  | 6.67342300  | -1.39262300 | -0.64521000 |
| H                                            | -4.89858800 | -2.55044900 | 3.01835900  | H  | 4.63164900  | 3.09676500  | -2.88895700 |

|                                                                           |            |             |             |    |             |             |             |
|---------------------------------------------------------------------------|------------|-------------|-------------|----|-------------|-------------|-------------|
| H                                                                         | 7.05700900 | 0.85013000  | 1.56098800  | H  | 2.04313000  | 1.36658100  | -2.67241000 |
| H                                                                         | 7.18306100 | 1.12445500  | -0.83444300 | H  | 0.57792000  | 5.07812200  | 0.37842200  |
| H                                                                         | 6.27763900 | -1.58724700 | 1.05657200  | H  | 4.73873100  | -0.99503200 | 4.53334200  |
| H                                                                         | 4.93462500 | -2.42333800 | 2.52674200  | H  | 0.38531100  | 2.62232800  | -1.26896200 |
| H                                                                         | 6.53625900 | -3.20763300 | -1.91116000 | H  | 4.49248800  | -2.58704200 | 3.01410400  |
| H                                                                         | 3.48050500 | 0.01920200  | 2.50104400  | H  | 5.12333500  | -2.41871900 | -3.14636300 |
| H                                                                         | 1.38616000 | 0.31929700  | -2.12041000 | H  | 1.90669600  | 0.15112300  | 4.27127900  |
| H                                                                         | 5.58335300 | 0.30904900  | 2.37540800  | H  | 4.87066800  | 2.37235900  | 2.16725700  |
| H                                                                         | 3.19028900 | -2.38137900 | 2.22130300  | H  | 2.33015800  | -1.27335600 | -3.59768000 |
| H                                                                         | 5.24368900 | -4.40924800 | -1.76746200 | H  | 2.60614000  | -2.68340500 | -2.55604700 |
| H                                                                         | 2.99293200 | 3.45571100  | -3.46386700 | H  | 5.97092900  | -0.92366100 | -2.71387600 |
| H                                                                         | 3.49827500 | -3.79569000 | 0.16180700  | H  | 6.02312200  | 1.21503000  | 1.44016800  |
| H                                                                         | 2.11304300 | 4.03369300  | -1.57047100 | H  | 1.71267600  | -1.27462100 | -1.93622900 |
| H                                                                         | 2.68489000 | 2.31119600  | 4.36898100  | H  | 5.00583700  | -4.11371300 | 1.14263400  |
| H                                                                         | 1.94595000 | 0.59525500  | -3.78640100 | H  | 4.33252500  | 0.69850300  | 4.82273600  |
| H                                                                         | 5.88753500 | 0.63490200  | -1.93079700 | H  | 0.65176400  | 4.93699300  | 2.13686100  |
| H                                                                         | 1.43240600 | -0.45923900 | 3.76565000  | H  | 4.80485100  | -0.93623100 | -4.05118900 |
| H                                                                         | 0.72056800 | 1.09162000  | 3.26754800  | H  | 1.36323400  | 2.74197900  | -3.54772500 |
| H                                                                         | 4.34562100 | 1.96166700  | 3.85743400  | H  | 6.05632300  | 0.88428500  | -1.08876600 |
| H                                                                         | 5.71711300 | 2.10838400  | -0.93571900 | B  | 0.01210400  | -3.30598000 | 0.13819800  |
| H                                                                         | 1.01546100 | -0.16871000 | 2.06027900  | H  | 0.30015800  | -1.54451400 | 0.61174800  |
| H                                                                         | 1.55350800 | 4.85658300  | 0.68937200  | H  | -0.05394300 | -3.09305800 | -1.02930200 |
| H                                                                         | 3.92345200 | 2.16245900  | -4.22100100 | H  | -0.91125100 | -3.40467700 | 0.88726900  |
| H                                                                         | 5.49065800 | -3.55383200 | -3.29212600 | N  | 1.39560700  | -3.69712400 | 0.72172400  |
| H                                                                         | 3.43266700 | 0.77474500  | 4.80993800  | H  | 1.46654600  | -4.71506900 | 0.60669100  |
| H                                                                         | 3.98645400 | -3.90709700 | 2.61371800  | H  | 2.20621600  | -3.28339300 | 0.24609500  |
| H                                                                         | 5.64497800 | 1.91773300  | 1.60193800  | H  | 1.48786700  | -3.49489000 | 1.71857100  |
| <b>TS6</b>                                                                |            |             |             | Cu | -1.24857200 | -1.24049700 | 0.31822400  |
| $E_{\text{solv}}(\text{B3LYP-D3BJ/Def2TZVP}) = -2381.669121 \text{ a.u.}$ |            |             |             | N  | -3.69627000 | 0.15255300  | -0.25986900 |
| Zero-point energy correction = 1.048957 a.u.                              |            |             |             | C  | -2.78613100 | 2.22052000  | 0.71964100  |
| Cu                                                                        | 0.98991200 | -0.12349200 | 0.24806500  | C  | -2.99014300 | 1.40603300  | -0.40723900 |
| N                                                                         | 3.57712100 | 0.89999100  | 0.15455900  | C  | -4.15717200 | -2.06796500 | 0.14776100  |
| C                                                                         | 4.02759800 | -0.90616200 | 1.75680300  | C  | -2.98758100 | 1.72837100  | 2.13904800  |
| C                                                                         | 3.95517500 | -0.47314700 | 0.41893600  | C  | -2.56314500 | 1.78381900  | -1.69421000 |
| C                                                                         | 2.18911000 | 2.71812100  | -0.12508700 | C  | -5.45994400 | -1.41391400 | -0.35611300 |
| C                                                                         | 3.60238200 | -0.04564500 | 2.93013000  | C  | -4.22648900 | -2.43046200 | 1.64969400  |
| C                                                                         | 4.15533900 | -1.34842300 | -0.66416600 | C  | -3.12216900 | -0.97928700 | 0.03052900  |
| C                                                                         | 3.64308700 | 3.24552400  | -0.13658400 | C  | -5.21760600 | 0.09980600  | -0.40876200 |
| C                                                                         | 1.39023900 | 3.19302400  | 1.11032500  | C  | -2.49760900 | 0.79963000  | -2.84473900 |
| C                                                                         | 2.32207800 | 1.23597600  | 0.04232800  | C  | -1.96445200 | 3.94518300  | -0.77529000 |
| C                                                                         | 4.58555500 | 2.03807600  | 0.02559400  | C  | -2.07011900 | 3.07800000  | -1.85595400 |
| C                                                                         | 3.87461400 | -0.96289100 | -2.10223400 | C  | -3.74937100 | -3.29351100 | -0.68594000 |
| C                                                                         | 4.69604900 | -3.09160000 | 0.93936100  | C  | -2.27569400 | 3.50340700  | 0.50234500  |
| C                                                                         | 4.53671500 | -2.66225000 | -0.37339400 | C  | -3.75471700 | 2.70973500  | 3.01943200  |
| C                                                                         | 1.40085800 | 3.02208800  | -1.40650300 | C  | -5.87525200 | 0.84463600  | 0.74382300  |
| C                                                                         | 4.41840400 | -2.22677900 | 1.99006400  | C  | -1.07665600 | 0.23524500  | -2.93856200 |
| C                                                                         | 4.63838700 | -0.01572400 | 4.04998600  | C  | -3.33936800 | -2.98599800 | -2.11838300 |
| C                                                                         | 5.45298000 | 2.13633800  | 1.27055200  | C  | -5.66329900 | 0.71626900  | -1.72348200 |
| C                                                                         | 2.55752400 | -1.58604700 | -2.57099100 | C  | -2.92670900 | 1.38837600  | -4.18372200 |
| C                                                                         | 1.98835200 | 2.46435400  | -2.69114400 | C  | -1.62950200 | 1.39930000  | 2.76518800  |
| C                                                                         | 5.48165700 | 1.81373200  | -1.18256000 | C  | -5.14033600 | -3.60172600 | 1.97311300  |
| C                                                                         | 5.01124700 | -1.33198800 | -3.05049900 | H  | -3.55725700 | 0.79205800  | 2.10596400  |
| C                                                                         | 2.24677300 | -0.51115300 | 3.46586900  | H  | -4.55488200 | -1.54224000 | 2.21079000  |
| C                                                                         | 1.18126400 | 4.69444600  | 1.20887400  | H  | -4.59344100 | -3.99656700 | -0.68728800 |
| H                                                                         | 3.46441900 | 0.98138100  | 2.57465400  | H  | -1.00889200 | 2.30140600  | -2.86149900 |
| H                                                                         | 1.89895900 | 2.83292100  | 2.02091100  | H  | -1.73715800 | 3.40516300  | -2.83967300 |
| H                                                                         | 1.29291900 | 4.11232000  | -1.49587700 | H  | -3.20797800 | -2.65208300 | 2.00490600  |
| H                                                                         | 2.30680500 | -1.53137400 | 3.86734500  | H  | -6.31209900 | -1.64684100 | 0.29273500  |
| H                                                                         | 4.70837900 | -3.36011900 | -1.19087000 | H  | -4.71772600 | 2.99000500  | 2.57758100  |
| H                                                                         | 0.40997400 | 2.69026200  | 1.08681600  | H  | -6.75251900 | 0.62151600  | -1.79318500 |
| H                                                                         | 3.80628100 | 3.95431900  | 0.68352000  | H  | -6.96172200 | 0.79321600  | 0.61522600  |
| H                                                                         | 5.62776900 | 0.28077500  | 3.68400600  | H  | -5.71522100 | -1.78429200 | -1.35619400 |
| H                                                                         | 6.19774600 | 2.64055300  | -1.24056900 | H  | -4.14243200 | -2.49865900 | -2.68645700 |
| H                                                                         | 6.17292800 | 2.94868000  | 1.12409300  | H  | -6.15359200 | -3.45056400 | 1.58131500  |
| H                                                                         | 3.86675500 | 3.78486500  | -1.06409900 | H  | -3.16251000 | -0.04460100 | -2.62310900 |
| H                                                                         | 2.99609700 | 2.84853800  | -2.89390200 | H  | -1.07138700 | 0.67292100  | 2.15298400  |
| H                                                                         | 2.12864800 | 5.24631500  | 1.21760500  | H  | -5.23156200 | 0.20147400  | -2.58863700 |
| H                                                                         | 3.74440900 | 0.12334200  | -2.14786300 | H  | -2.45998500 | -2.32788000 | -2.15769000 |
| H                                                                         | 1.47566500 | -0.50496500 | 2.68051600  | H  | -4.75897900 | -4.54138200 | 1.55935800  |
| H                                                                         | 4.92094200 | 1.79623300  | -2.12299500 | H  | -3.18373400 | 3.63022300  | 3.19159800  |

|   |             |             |             |    |             |             |             |
|---|-------------|-------------|-------------|----|-------------|-------------|-------------|
| H | -2.92318100 | -3.80887800 | -0.17296200 | H  | -2.39664600 | -1.04042100 | 4.04008700  |
| H | -2.11866400 | 4.16479700  | 1.35278700  | H  | -2.65236000 | -2.62881000 | 3.28696400  |
| H | -2.22021600 | 2.14922100  | -4.53769600 | H  | -6.02729900 | -0.91328000 | 3.04040500  |
| H | -1.75899900 | 0.96953100  | 3.76566600  | H  | -6.02998300 | 0.44365200  | -1.45828400 |
| H | -5.63460900 | 0.40426300  | 1.71772800  | H  | -1.75416800 | -1.37272600 | 2.41628100  |
| H | -1.01250100 | -0.53830300 | -3.71433700 | H  | -4.76423700 | -4.77846500 | -0.15389200 |
| H | -0.35559900 | 1.02653500  | -3.18518600 | H  | -4.31903000 | -0.65831500 | -4.62783000 |
| H | -3.91884100 | 1.85080800  | -4.12639300 | H  | -0.87598500 | 4.09045900  | -2.75944600 |
| H | -5.59131000 | 1.90351300  | 0.74949900  | H  | -4.89257400 | -0.70414200 | 4.38838300  |
| H | -0.75700800 | -0.21410500 | -1.98316900 | H  | -1.39402600 | 2.90458200  | 3.24458300  |
| H | -1.59210600 | 4.95650300  | -0.92620800 | H  | -6.15846600 | 0.51629700  | 1.09469200  |
| H | -3.94871400 | 2.26034400  | 3.99985700  | H  | -0.22723900 | -1.95077500 | 0.14844400  |
| H | -5.22303700 | -3.72884700 | 3.05687400  | Cu | 1.26536000  | -1.40981600 | 0.05248300  |
| H | -2.96014400 | 0.60058600  | -4.94451900 | N  | 3.72633500  | 0.06020900  | 0.04409700  |
| H | -3.07827200 | -3.90575500 | -2.65192200 | C  | 2.65262300  | 1.88668400  | -1.20341300 |
| H | -5.41734300 | 1.78308200  | -1.77962900 | C  | 2.99081400  | 1.30552100  | 0.03221500  |
| O | -0.24763200 | -5.53749500 | -0.32227700 | C  | 4.19771400  | -2.19035600 | -0.04776600 |
| H | -0.45433600 | -5.65963600 | -1.25661300 | C  | 2.77365300  | 1.14238900  | -2.51832100 |
| H | -0.98052300 | -5.94216900 | 0.15706100  | C  | 2.64429900  | 1.90047100  | 1.25866000  |

### INT3

$E_{\text{solv}} = -2222.771288$  a.u.

Zero-point energy correction = 0.966997 a.u.

|    |             |             |             |   |            |             |             |
|----|-------------|-------------|-------------|---|------------|-------------|-------------|
| Cu | -1.04333200 | -0.57782400 | 0.08698400  | C | 3.15239100 | -1.11018700 | 0.01855400  |
| N  | -3.64118100 | 0.40583400  | -0.05925300 | C | 5.25339700 | 0.04852100  | 0.05154300  |
| C  | -3.98726600 | -1.67286400 | -1.32046400 | C | 2.74035200 | 1.16534500  | 2.58000300  |
| C  | -3.97253400 | -1.00540000 | -0.08126700 | C | 1.83426300 | 3.31733100  | 0.01516200  |
| C  | -2.29812900 | 2.27507500  | -0.09686500 | C | 2.07822500 | 3.17551500  | 1.22173600  |
| C  | -3.58634800 | -1.01072800 | -2.62419000 | C | 3.90600300 | -3.28464300 | 0.98995400  |
| C  | -4.15177800 | -1.68474300 | 1.13690900  | C | 2.08243500 | 3.16124800  | -1.18257700 |
| C  | -3.76540000 | 2.76389200  | -0.13241500 | C | 3.36668800 | 1.98442800  | -3.64298600 |
| C  | -1.55003400 | 2.54078200  | -1.42266600 | C | 5.79577500 | 0.62209800  | -1.24966700 |
| C  | -2.39334700 | 0.78207000  | 0.00159300  | C | 1.34769200 | 0.67398100  | 2.98507900  |
| C  | -4.67457900 | 1.52074000  | -0.13823600 | C | 3.66120200 | -2.77482800 | 2.40236800  |
| C  | -3.91707000 | -1.04077400 | 2.48832200  | C | 5.79229800 | 0.86140200  | 1.21655400  |
| C  | -4.53141900 | -3.71662700 | -0.13296800 | C | 3.35934400 | 1.99965900  | 3.69649300  |
| C  | -4.44603500 | -3.04839900 | 1.08021400  | C | 1.40522600 | 0.59125800  | -2.92760000 |
| C  | -1.48667800 | 2.82324200  | 1.08506500  | C | 5.01664000 | -3.95901600 | -1.73862100 |
| C  | -4.28437300 | -3.03641600 | -1.31757100 | H | 3.43076300 | 0.27867500  | -2.36801900 |
| C  | -4.60458100 | -1.23230900 | -3.73875000 | H | 4.34827100 | -1.96393900 | -2.19728600 |
| C  | -5.50209600 | 1.40374300  | -1.40931000 | H | 4.75124700 | -3.98657700 | 0.99205600  |
| C  | -2.60564400 | -1.55005000 | 3.09109800  | H | 0.69794200 | 1.40595700  | -3.13896300 |
| C  | -2.00846800 | 2.44625200  | 2.46141300  | H | 1.80081300 | 3.66391500  | 2.15473900  |
| C  | -5.60666800 | 1.46356100  | 1.06182500  | H | 3.06446200 | -3.04816300 | -1.68048100 |
| C  | -5.07421900 | -1.25640000 | 3.45915500  | H | 6.31308400 | -1.77517500 | -0.49360800 |
| C  | -2.19849600 | -1.48571800 | -3.05848100 | H | 4.33174500 | 2.42202000  | -3.36257100 |
| C  | -1.36725400 | 4.00476600  | -1.78353300 | H | 6.88561500 | 0.79091100  | 1.20978900  |
| H  | -3.50973700 | 0.06861000  | -2.45520500 | H | 6.89006200 | 0.61917300  | -1.19999500 |
| H  | -2.08164100 | 2.02531800  | -2.24043500 | H | 5.90262900 | -1.66381600 | 1.21313800  |
| H  | -1.43774100 | 3.91801000  | 0.99530500  | H | 4.50523800 | -2.18509500 | 2.78322900  |
| H  | -2.19118600 | -2.56500100 | -3.25741600 | H | 6.06246000 | -3.73973800 | -1.49062900 |
| H  | -4.59029100 | -3.59952400 | 2.00759200  | H | 3.36639400 | 0.27532100  | 2.43938400  |
| H  | -0.56236200 | 2.05902900  | -1.34896400 | H | 0.96739300 | -0.03296500 | -2.13178500 |
| H  | -3.95700800 | 3.37122600  | -1.02459600 | H | 5.44138600 | 0.48104200  | 2.18215100  |
| H  | -5.61122100 | -0.91840400 | -3.43946300 | H | 2.76356000 | -2.14260400 | 2.45437600  |
| H  | -6.33969700 | 2.27272200  | 0.97202400  | H | 4.71179100 | -4.83472500 | -1.15583600 |
| H  | -6.25650300 | 2.19791100  | -1.40503600 | H | 2.69717600 | 2.80409100  | -3.93134900 |
| H  | -3.99383500 | 3.39936200  | 0.73108900  | H | 3.02860100 | -3.85759400 | 0.65061000  |
| H  | -3.03995100 | 2.78421700  | 2.62565800  | H | 1.81948400 | 3.64298600  | -2.12283300 |
| H  | -2.32188300 | 4.54029800  | -1.84862400 | H | 2.72170300 | 2.84998100  | 3.96741900  |
| H  | -3.80196900 | 0.03907000  | 2.34357000  | H | 1.49154000 | -0.02432900 | -3.83121400 |
| H  | -1.44250500 | -1.28547300 | -2.28381100 | H | 5.50277000 | 0.03005900  | -2.12345600 |
| H  | -5.07510600 | 1.60192500  | 2.00938600  | H | 1.39753100 | 0.08144200  | 3.90688300  |
| H  | -1.98174500 | 1.35907800  | 2.62200700  | H | 0.66922900 | 1.52009600  | 3.16003200  |
| H  | -0.73816500 | 4.52693200  | -1.05381100 | H | 4.34243100 | 2.39343800  | 3.41393800  |
| H  | -4.65673100 | -2.28720300 | -4.03472500 | H | 5.47288000 | 1.65982400  | -1.39483800 |
| H  | -0.45384600 | 2.45819400  | 0.97535400  | H | 0.89647300 | 0.04559300  | 2.19991100  |
| H  | -4.30390000 | -3.57824100 | -2.26126000 | H | 1.40709700 | 4.81824200  | 0.00970900  |
| H  | -5.18691300 | -2.31466500 | 3.72482000  | H | 3.52041900 | 1.36407400  | -4.53319400 |
| H  | -1.88723700 | -0.96730400 | -3.97400300 | H | 4.98212000 | -4.23963000 | -2.79590500 |
| H  | -4.89836400 | 1.52939400  | -2.31410800 | H | 3.48292600 | 1.38753200  | 4.59708900  |
|    |             |             |             | H | 3.51148500 | -3.60806200 | 3.09599000  |

H 5.52578200 1.92150700 1.13006500  
**INT4**  
 $E_{\text{solv}} = -2305.98365$  a.u.  
Zero-point energy correction = 1.035723 a.u.

|    |             |             |             |
|----|-------------|-------------|-------------|
| Cu | 1.47777100  | 0.86880300  | 0.17583200  |
| N  | 4.09261800  | -0.30827600 | -0.21214800 |
| C  | 4.58348000  | 1.39938900  | -1.91335300 |
| C  | 4.57629600  | 1.00873900  | -0.56256800 |
| C  | 2.64504300  | -2.01636800 | 0.28459200  |
| C  | 4.01344800  | 0.54509800  | -3.02793500 |
| C  | 4.96035100  | 1.88471000  | 0.46825800  |
| C  | 4.07782300  | -2.53733500 | 0.50918200  |
| C  | 1.97964700  | -2.57022100 | -1.00028700 |
| C  | 2.82253800  | -0.53652300 | 0.02644500  |
| C  | 5.02201600  | -1.51443000 | -0.12309600 |
| C  | 4.80338400  | 1.55940600  | 1.94133400  |
| C  | 5.49455300  | 3.53920600  | -1.22411200 |
| C  | 5.42882800  | 3.14901800  | 0.10619000  |
| C  | 1.72600100  | -2.26860600 | 1.48873700  |
| C  | 5.06061200  | 2.67504400  | -2.21943300 |
| C  | 4.97227400  | 0.39463400  | -4.20601200 |
| C  | 5.50694700  | -1.94243400 | -1.50262500 |
| C  | 3.65795000  | 2.36848900  | 2.55346600  |
| C  | 2.15677200  | -1.59553400 | 2.78277300  |
| C  | 6.23205600  | -1.21748700 | 0.74577800  |
| C  | 6.09189500  | 1.78322200  | 2.72947100  |
| C  | 2.66904400  | 1.09878200  | -3.49969800 |
| C  | 1.98819300  | -4.08352000 | -1.13870600 |
| H  | 3.81686100  | -0.45440800 | -2.62837000 |
| H  | 2.45075000  | -2.12514300 | -1.89182200 |
| H  | 1.64036800  | -3.35479100 | 1.64514000  |
| H  | 2.77850200  | 2.11235500  | -3.90769900 |
| H  | 5.73333800  | 3.84605700  | 0.88498900  |
| H  | 0.94123200  | -2.20896700 | -1.00645500 |
| H  | 4.24111700  | -3.53795100 | 0.09582600  |
| H  | 5.95941000  | 0.03567900  | -3.89148500 |
| H  | 6.84833800  | -2.12175800 | 0.80218900  |
| H  | 6.17951800  | -2.79867000 | -1.38002900 |
| H  | 4.28640100  | -2.60560500 | 1.58349300  |
| H  | 3.13441300  | -1.94357900 | 3.13746600  |
| H  | 2.99627000  | -4.47999400 | -1.30657700 |
| H  | 4.52837500  | 0.50135800  | 2.03727300  |
| H  | 1.94560100  | 1.14544400  | -2.67508400 |
| H  | 5.94898600  | -0.94645100 | 1.76803800  |
| H  | 2.21176300  | -0.50487400 | 2.66127600  |
| H  | 1.57503600  | -4.57776200 | -0.25102500 |
| H  | 5.11723200  | 1.34670300  | -4.73171600 |
| H  | 0.71490500  | -1.92002600 | 1.21908300  |
| H  | 5.07467800  | 3.00160900  | -3.25778400 |
| H  | 6.35712800  | 2.84683500  | 2.77207100  |
| H  | 2.25246200  | 0.45910500  | -4.28818300 |
| H  | 4.68984100  | -2.25751700 | -2.16063600 |
| H  | 3.55472600  | 2.13367300  | 3.62017000  |
| H  | 3.83808600  | 3.44757000  | 2.45874900  |
| H  | 6.93961900  | 1.24565000  | 2.28934900  |
| H  | 6.07483000  | -1.14406000 | -1.99391800 |
| H  | 2.70065800  | 2.14247700  | 2.06317300  |
| H  | 5.86626500  | 4.52756400  | -1.48421900 |
| H  | 4.56650300  | -0.31936700 | -4.93228100 |
| H  | 1.37741500  | -4.38567500 | -1.99702700 |
| H  | 5.96722200  | 1.43725000  | 3.76227200  |
| H  | 1.43509800  | -1.79747300 | 3.58233400  |
| H  | 6.85071400  | -0.41819400 | 0.31981800  |
| H  | 0.47107200  | 1.16469500  | 1.53294100  |
| Cu | -0.93749700 | 0.78696800  | 0.92292200  |
| N  | -3.36719200 | -0.57436700 | 0.13204600  |
| C  | -2.11736800 | -2.12748700 | -1.30398300 |
| C  | -2.63497100 | -1.81034400 | -0.03479800 |
| C  | -3.79661600 | 1.65966900  | 0.45531000  |
| C  | -2.09589500 | -1.14043600 | -2.45385000 |

|   |             |             |             |
|---|-------------|-------------|-------------|
| C | -2.44118600 | -2.64267200 | 1.08111700  |
| C | -5.15977800 | 0.94859700  | 0.33295100  |
| C | -3.46858600 | 2.49689300  | -0.80443600 |
| C | -2.78394900 | 0.54508200  | 0.46314300  |
| C | -4.87621600 | -0.50094700 | -0.08849600 |
| C | -2.79742600 | -2.22567700 | 2.49370400  |
| C | -1.36552500 | -4.24390800 | -0.38840900 |
| C | -1.80231000 | -3.86687400 | 0.87334800  |
| C | -3.67842100 | 2.51291800  | 1.72604700  |
| C | -1.50007300 | -3.36924400 | -1.45826900 |
| C | -2.58752900 | -1.73185900 | -3.77097500 |
| C | -5.22865100 | -0.77365900 | -1.54351500 |
| C | -1.52543600 | -1.86584200 | 3.26258500  |
| C | -3.66372600 | 1.71907100  | 3.02390600  |
| C | -5.59283300 | -1.51347500 | 0.78937400  |
| C | -3.59778400 | -3.28503800 | 3.24553400  |
| C | -0.68815700 | -0.56536000 | -2.61840900 |
| C | -4.26600600 | 3.78431300  | -0.93339000 |
| H | -2.74978300 | -0.29958000 | -2.19996600 |
| H | -3.63681800 | 1.87036200  | -1.69376600 |
| H | -4.51365800 | 3.22675500  | 1.73804100  |
| H | 0.01752600  | -1.33405700 | -2.96327900 |
| H | -1.63711800 | -4.53168400 | 1.71931400  |
| H | -2.39083000 | 2.72469500  | -0.80359700 |
| H | -5.81539400 | 1.44358200  | -0.39322800 |
| H | -3.58845100 | -2.16866100 | -3.67738400 |
| H | -6.67154100 | -1.40919600 | 0.62883200  |
| H | -6.31869200 | -0.73982300 | -1.64661100 |
| H | -5.68914100 | 0.95998800  | 1.29338700  |
| H | -4.55350000 | 1.08530400  | 3.13317600  |
| H | -5.34618500 | 3.60268100  | -0.87089600 |
| H | -3.40719900 | -1.31511500 | 2.44548800  |
| H | -0.30376500 | -0.16312100 | -1.66817400 |
| H | -5.39887100 | -1.34630700 | 1.85426200  |
| H | -2.78083500 | 1.06698300  | 3.08655800  |
| H | -4.00294800 | 4.50563000  | -0.15212600 |
| H | -1.91316200 | -2.51508200 | -4.13845000 |
| H | -2.75952900 | 3.11602000  | 1.65829500  |
| H | -1.09898800 | -3.64570700 | -2.43225600 |
| H | -3.00232500 | -4.18862200 | 3.42479200  |
| H | -0.68762600 | 0.24940500  | -3.35391300 |
| H | -4.80959300 | -0.02702100 | -2.22635300 |
| H | -1.77228800 | -1.51386300 | 4.27187700  |
| H | -0.86382600 | -2.73758600 | 3.35785700  |
| H | -4.49923400 | -3.58158400 | 2.69712600  |
| H | -4.89707000 | -1.77109600 | -1.85519300 |
| H | -0.95965800 | -1.07078100 | 2.75212800  |
| H | -0.88783000 | -5.21029600 | -0.53325700 |
| H | -2.62804600 | -0.95172100 | -4.53988300 |
| H | -4.06754700 | 4.25837900  | -1.89962100 |
| H | -3.90551100 | -2.89896100 | 4.22418300  |
| H | -3.63606800 | 2.38829900  | 3.88956400  |
| H | -5.31435200 | -2.54216700 | 0.53074400  |
| B | 1.13600200  | 2.99955900  | -0.77290800 |
| H | 0.39002500  | 2.05882500  | -1.06980600 |
| H | 1.37368500  | 3.67144500  | -1.74864400 |
| H | 2.18530800  | 2.62947600  | -0.24690400 |
| N | 0.37406700  | 3.90923600  | 0.31857700  |
| H | 0.98014900  | 4.64147000  | 0.68615100  |
| H | -0.45524200 | 4.37249400  | -0.05093600 |
| H | 0.08070200  | 3.33301200  | 1.11373800  |

**INT5**  
 $E_{\text{solv}} = -2464.908956$  a.u.  
Zero-point energy correction = 1.124383 a.u.

|    |            |             |             |
|----|------------|-------------|-------------|
| Cu | 1.54690200 | 0.92398400  | 0.11000900  |
| N  | 4.12512100 | -0.29476100 | -0.25394900 |
| C  | 4.58522400 | 1.41666300  | -1.95999800 |
| C  | 4.60604900 | 1.02233700  | -0.61050500 |
| C  | 2.67332900 | -1.99446400 | 0.26509300  |
| C  | 3.99990000 | 0.56212000  | -3.06633200 |

|    |             |             |             |                                              |             |             |             |
|----|-------------|-------------|-------------|----------------------------------------------|-------------|-------------|-------------|
| C  | 5.00983900  | 1.89568000  | 0.41525300  | C                                            | -2.60437900 | -1.74289000 | -3.70255500 |
| C  | 4.10641500  | -2.51999800 | 0.47659000  | C                                            | -5.21373700 | -0.81240500 | -1.44399900 |
| C  | 1.98972200  | -2.54813600 | -1.01030600 | C                                            | -1.46988600 | -1.88821100 | 3.32942500  |
| C  | 2.85850600  | -0.51715600 | 0.00114400  | C                                            | -3.66519500 | 1.74308300  | 3.06227500  |
| C  | 5.04712000  | -1.50819700 | -0.17910800 | C                                            | -5.55688400 | -1.41689200 | 0.93160900  |
| C  | 4.88746600  | 1.56611700  | 1.89069100  | C                                            | -3.56924700 | -3.26588100 | 3.31718100  |
| C  | 5.50217000  | 3.55775000  | -1.28189600 | C                                            | -0.69438100 | -0.56546700 | -2.57986800 |
| C  | 5.46672200  | 3.16257700  | 0.04807400  | C                                            | -4.09352000 | 3.82392100  | -0.90066800 |
| C  | 1.76219900  | -2.22987500 | 1.47779900  | H                                            | -2.74997900 | -0.30510000 | -2.13559700 |
| C  | 5.05121000  | 2.69527100  | -2.27097200 | H                                            | -3.50792300 | 1.89031600  | -1.65105500 |
| C  | 4.93958900  | 0.42035800  | -4.26079200 | H                                            | -4.41940900 | 3.27569900  | 1.74959600  |
| C  | 5.50035500  | -1.94300900 | -1.56723200 | H                                            | 0.00841300  | -1.32976600 | -2.93970300 |
| C  | 3.76513800  | 2.38196000  | 2.53523900  | H                                            | -1.60940000 | -4.53098400 | 1.78226900  |
| C  | 2.24278900  | -1.59495500 | 2.77332800  | H                                            | -2.25416300 | 2.70856900  | -0.74068700 |
| C  | 6.27597500  | -1.21714300 | 0.66433400  | H                                            | -5.68884800 | 1.49076100  | -0.44604200 |
| C  | 6.19638300  | 1.77948600  | 2.64738900  | H                                            | -3.60290900 | -2.18141000 | -3.59393100 |
| C  | 2.64394400  | 1.10827800  | -3.51273200 | H                                            | -6.63548200 | -1.30987200 | 0.77284800  |
| C  | 2.00092500  | -4.06118200 | -1.15067900 | H                                            | -6.30466300 | -0.76767100 | -1.53118000 |
| H  | 3.81705500  | -0.43983700 | -2.66661700 | H                                            | -5.66938300 | 1.07988600  | 1.26295300  |
| H  | 2.44453700  | -2.10022900 | -1.90863300 | H                                            | -4.56283400 | 1.11411900  | 3.12425600  |
| H  | 1.63089000  | -3.31255400 | 1.62244100  | H                                            | -5.17925800 | 3.67550900  | -0.84821800 |
| H  | 2.73709000  | 2.12631200  | -3.91321000 | H                                            | -3.34361600 | -1.29758900 | 2.52206600  |
| H  | 5.78648300  | 3.85752300  | 0.82254000  | H                                            | -0.29492100 | -0.16651600 | -1.63454100 |
| H  | 0.95039200  | -2.18989700 | -0.99906700 | H                                            | -5.35297100 | -1.18750300 | 1.98335500  |
| H  | 4.25997500  | -3.52625600 | 0.07372400  | H                                            | -2.79187000 | 1.08371600  | 3.17553600  |
| H  | 5.93413300  | 0.06780700  | -3.96285600 | H                                            | -3.81571300 | 4.53891700  | -0.11849700 |
| H  | 6.88634600  | -2.12582300 | 0.71141700  | H                                            | -1.93287900 | -2.52582900 | -4.07560500 |
| H  | 6.16811800  | -2.80441900 | -1.45580100 | H                                            | -2.66742200 | 3.11052000  | 1.73149500  |
| H  | 4.32979700  | -2.57485200 | 1.54850400  | H                                            | -1.10230000 | -3.65258300 | -2.37517900 |
| H  | 3.15702100  | -2.05844600 | 3.16070100  | H                                            | -2.99287800 | -4.18416500 | 3.48320600  |
| H  | 3.00662500  | -4.45396500 | -1.33946200 | H                                            | -0.70916600 | 0.25283300  | -3.31129300 |
| H  | 4.60741300  | 0.50954600  | 1.99166600  | H                                            | -4.79717600 | -0.10825100 | -2.17169300 |
| H  | 1.93289400  | 1.14103300  | -2.67641200 | H                                            | -1.70413400 | -1.49935400 | 4.32841300  |
| H  | 6.01557000  | -0.94130900 | 1.69129700  | H                                            | -0.83915300 | -2.77941900 | 3.44899600  |
| H  | 2.45157300  | -0.52421200 | 2.63440400  | H                                            | -4.48271000 | -3.53769400 | 2.77616800  |
| H  | 1.60739400  | -4.55830500 | -0.25571700 | H                                            | -4.90165600 | -1.82975800 | -1.70777500 |
| H  | 5.06913400  | 1.37410600  | -4.78735800 | H                                            | -0.87528000 | -1.13023800 | 2.79663200  |
| H  | 0.76333800  | -1.83474800 | 1.22624200  | H                                            | -0.87866700 | -5.21396000 | -0.47465500 |
| H  | 5.04361100  | 3.02514900  | -3.30825500 | H                                            | -2.65650600 | -0.96563000 | -4.47363000 |
| H  | 6.46933200  | 2.84119500  | 2.68502200  | H                                            | -3.87068100 | 4.28837900  | -1.86610800 |
| H  | 2.21980500  | 0.47101800  | -4.29896800 | H                                            | -3.85843400 | -2.88007000 | 4.30155900  |
| H  | 4.66828100  | -2.25268900 | -2.20870200 | H                                            | -3.69116200 | 2.41475800  | 3.92677500  |
| H  | 3.68724300  | 2.13791600  | 3.60288200  | H                                            | -5.29236200 | -2.46235300 | 0.73273300  |
| H  | 3.95099800  | 3.46057700  | 2.44945800  | B                                            | 1.15069500  | 3.00277500  | -0.71624300 |
| H  | 7.02878300  | 1.23766000  | 2.18449400  | H                                            | 0.40129100  | 2.02627600  | -0.91620400 |
| H  | 6.06533400  | -1.15047000 | -2.07118100 | H                                            | 1.35451600  | 3.56388100  | -1.76298600 |
| H  | 2.79598600  | 2.17549600  | 2.05784700  | H                                            | 2.21401700  | 2.70218300  | -0.17301100 |
| H  | 5.86482100  | 4.54823100  | -1.54628400 | N                                            | 0.39478200  | 4.01489200  | 0.28040000  |
| H  | 4.52651200  | -0.29551700 | -4.98092800 | H                                            | 0.98904500  | 4.81350200  | 0.50136200  |
| H  | 1.37413900  | -4.36371900 | -1.99710900 | H                                            | -0.46214400 | 4.39595300  | -0.12066300 |
| H  | 6.09556000  | 1.43152600  | 3.68206300  | H                                            | 0.14319100  | 3.58356000  | 1.17398200  |
| H  | 1.48118300  | -1.68539100 | 3.55674800  | B                                            | 0.04162300  | 3.09965700  | 3.92035200  |
| H  | 6.89195500  | -0.42431900 | 0.22286400  | H                                            | 1.05280400  | 3.74061600  | 3.84029200  |
| H  | 0.57255700  | 0.97345200  | 1.59244200  | H                                            | -0.74820700 | 3.23018600  | 3.01773500  |
| Cu | -0.87398300 | 0.72864600  | 0.98765100  | N                                            | -0.69585400 | 3.41070200  | 5.28886200  |
| N  | -3.32564600 | -0.56169200 | 0.20008000  | H                                            | -1.05147800 | 4.36762000  | 5.28123100  |
| C  | -2.10410500 | -2.12856600 | -1.24039600 | H                                            | -1.49780300 | 2.79944800  | 5.44933700  |
| C  | -2.60791100 | -1.80713100 | 0.03357900  | H                                            | -0.09108600 | 3.33519400  | 6.10812500  |
| C  | -3.71225800 | 1.68586200  | 0.49312600  | O                                            | 0.34955800  | 1.58099100  | 3.97182100  |
| C  | -2.09730000 | -1.14539100 | -2.39408700 | H                                            | 0.37873600  | 1.21463600  | 3.03186500  |
| C  | -2.40992700 | -2.63893600 | 1.14909900  | H                                            | 1.16226600  | 1.32330700  | 4.43545700  |
| C  | -5.08972700 | 1.00812300  | 0.33510500  |                                              |             |             |             |
| C  | -3.33756600 | 2.51338400  | -0.75964900 | <b>INT5-a</b>                                |             |             |             |
| C  | -2.72537600 | 0.55030500  | 0.52188900  | $E_{\text{solv}} = -1270.62894 \text{ a.u.}$ |             |             |             |
| C  | -4.83586900 | -0.46753600 | -0.01147600 | Zero-point energy correction = 0.558058 a.u. |             |             |             |
| C  | -2.75207700 | -2.22006100 | 2.56468700  | Cu                                           | 1.55071300  | 0.91788300  | 0.10655600  |
| C  | -1.35150700 | -4.24561800 | -0.32737500 | N                                            | 4.14558800  | -0.30605400 | -0.20546900 |
| C  | -1.77756900 | -3.86588000 | 0.93718000  | C                                            | 4.66891500  | 1.37492000  | -1.92380100 |
| C  | -3.60723200 | 2.53626900  | 1.76594100  | C                                            | 4.64300300  | 1.00272400  | -0.56814300 |
| C  | -1.49242700 | -3.37249600 | -1.39782700 | C                                            | 2.67098600  | -1.98655300 | 0.30723100  |
|    |             |             |             | C                                            | 4.11982900  | 0.50256100  | -3.03473600 |

|    |             |             |             |                                              |             |             |             |
|----|-------------|-------------|-------------|----------------------------------------------|-------------|-------------|-------------|
| C  | 5.01462400  | 1.89191000  | 0.45604700  | C                                            | -2.56277600 | -1.67371200 | -3.80101300 |
| C  | 4.09452900  | -2.51768200 | 0.56378000  | C                                            | -5.17810200 | -0.75533100 | -1.54533300 |
| C  | 2.01518600  | -2.55948200 | -0.97477900 | C                                            | -1.49487200 | -1.99351300 | 3.22207900  |
| C  | 2.87088500  | -0.51493400 | 0.02309000  | C                                            | -3.59929600 | 1.71249500  | 3.02637200  |
| C  | 5.05828100  | -1.52257800 | -0.08366600 | C                                            | -5.54794600 | -1.48967600 | 0.78822900  |
| C  | 4.84475400  | 1.58360500  | 1.93100600  | C                                            | -3.59223600 | -3.37380500 | 3.16677700  |
| C  | 5.56860200  | 3.52486700  | -1.25023700 | C                                            | -0.62932300 | -0.56658300 | -2.64753300 |
| C  | 5.48760000  | 3.15155400  | 0.08410800  | C                                            | -4.09679700 | 3.80099600  | -0.91457400 |
| C  | 1.72999200  | -2.19800500 | 1.50144000  | H                                            | -2.68127300 | -0.26703300 | -2.20244900 |
| C  | 5.14854400  | 2.64725400  | -2.23976500 | H                                            | -3.59271900 | 1.85768800  | -1.69211400 |
| C  | 5.09883500  | 0.34011000  | -4.19443000 | H                                            | -4.36137200 | 3.25518400  | 1.73022500  |
| C  | 5.54782400  | -1.98783700 | -1.44934700 | H                                            | 0.05707000  | -1.34175800 | -3.01584800 |
| C  | 3.71558800  | 2.41956300  | 2.53583600  | H                                            | -1.63745300 | -4.61027700 | 1.61599600  |
| C  | 2.16572900  | -1.52487700 | 2.79379700  | H                                            | -2.27709200 | 2.64184700  | -0.84587100 |
| C  | 6.26513500  | -1.22303400 | 0.78832400  | H                                            | -5.72223100 | 1.47404000  | -0.38896500 |
| C  | 6.13401300  | 1.79118000  | 2.72263500  | H                                            | -3.57155300 | -2.09134800 | -3.70562300 |
| C  | 2.77973000  | 1.04100200  | -3.53484300 | H                                            | -6.62476900 | -1.37215700 | 0.62438700  |
| C  | 2.02196900  | -4.07491600 | -1.08742600 | H                                            | -6.26741400 | -0.70075400 | -1.64583800 |
| H  | 3.92217900  | -0.49209900 | -2.62445000 | H                                            | -5.60678200 | 0.98065600  | 1.29536300  |
| H  | 2.49399000  | -2.12961800 | -1.86959400 | H                                            | -4.54577800 | 1.17353600  | 3.15932700  |
| H  | 1.60567600  | -3.27847100 | 1.66931000  | H                                            | -5.18168300 | 3.67615400  | -0.80879900 |
| H  | 2.88779300  | 2.05061600  | -3.95276300 | H                                            | -3.36375000 | -1.38796200 | 2.41647500  |
| H  | 5.78424200  | 3.85793400  | 0.85756600  | H                                            | -0.22630500 | -0.19209100 | -1.69408300 |
| H  | 0.97745700  | -2.19640400 | -0.99615400 | H                                            | -5.35524700 | -1.32020100 | 1.85306600  |
| H  | 4.25173400  | -3.53122800 | 0.18098900  | H                                            | -2.79223000 | 0.96586200  | 3.06600600  |
| H  | 6.08265000  | -0.00771400 | -3.85757300 | H                                            | -3.76517700 | 4.50998300  | -0.14791200 |
| H  | 6.86726800  | -2.13470800 | 0.87119500  | H                                            | -1.90813800 | -2.46416600 | -4.18791700 |
| H  | 6.20598700  | -2.85125600 | -1.30177200 | H                                            | -2.61387800 | 3.06292900  | 1.67128400  |
| H  | 4.28966500  | -2.55748100 | 1.64198900  | H                                            | -1.07113900 | -3.62645000 | -2.50937000 |
| H  | 3.09576100  | -1.94157500 | 3.19748400  | H                                            | -3.01435900 | -4.29307800 | 3.32157600  |
| H  | 3.03010100  | -4.47589600 | -1.24328100 | H                                            | -0.62026300 | 0.26320300  | -3.36609100 |
| H  | 4.54762200  | 0.53230900  | 2.03595600  | H                                            | -4.74649800 | -0.01817200 | -2.23033600 |
| H  | 2.04315500  | 1.09105100  | -2.72215200 | H                                            | -1.73661900 | -1.64365600 | 4.23387900  |
| H  | 5.97774400  | -0.92421800 | 1.80157300  | H                                            | -0.85591900 | -2.88194200 | 3.31405200  |
| H  | 2.32310500  | -0.44678300 | 2.64420400  | H                                            | -4.49876500 | -3.63816100 | 2.61065600  |
| H  | 1.60331500  | -4.55357900 | -0.19368000 | H                                            | -4.86648800 | -1.75934700 | -1.85640800 |
| H  | 5.24700900  | 1.28477400  | -4.73244300 | H                                            | -0.90637400 | -1.21408000 | 2.71260700  |
| H  | 0.73497300  | -1.81889200 | 1.21297900  | H                                            | -0.88295500 | -5.23908500 | -0.64919800 |
| H  | 5.17671300  | 2.96006200  | -3.28200100 | H                                            | -2.59386600 | -0.87946500 | -4.55576000 |
| H  | 6.41950300  | 2.84992100  | 2.75213000  | H                                            | -3.91130900 | 4.25989300  | -1.89055400 |
| H  | 2.37997600  | 0.38858500  | -4.32154200 | H                                            | -3.89335700 | -3.00821700 | 4.15528700  |
| H  | 4.73164300  | -2.30526500 | -2.10714000 | H                                            | -3.48059700 | 2.37518600  | 3.89029500  |
| H  | 3.59703500  | 2.17734300  | 3.59994600  | H                                            | -5.28235500 | -2.52269000 | 0.53345800  |
| H  | 3.92749200  | 3.49427000  | 2.45549500  | B                                            | 1.18527200  | 2.97839500  | -0.85898500 |
| H  | 6.97280700  | 1.23229900  | 2.29273600  | H                                            | 0.48587400  | 1.98376800  | -1.11135200 |
| H  | 6.13230700  | -1.20961400 | -1.95329400 | H                                            | 1.43206500  | 3.57273800  | -1.87917200 |
| H  | 2.75695400  | 2.22934700  | 2.02975900  | H                                            | 2.22348100  | 2.69917200  | -0.25886000 |
| H  | 5.94299700  | 4.50995900  | -1.51852700 | N                                            | 0.33305100  | 3.93647700  | 0.11650800  |
| H  | 4.70946000  | -0.38761300 | -4.91593700 | H                                            | 0.88364600  | 4.73435700  | 0.43149200  |
| H  | 1.41510000  | -4.39023900 | -1.94355400 | H                                            | -0.50344000 | 4.31664000  | -0.32592800 |
| H  | 5.99869300  | 1.46039800  | 3.75909200  | H                                            | 0.03322300  | 3.42589100  | 0.95164300  |
| H  | 1.39967100  | -1.64283000 | 3.56950600  | B                                            | -0.19932500 | 3.11975000  | 4.27326500  |
| H  | 6.89931800  | -0.44351600 | 0.34880500  | H                                            | -0.75980700 | 3.39932700  | 5.29122700  |
| H  | 0.55500900  | 1.16395400  | 1.50850300  | H                                            | -0.75948300 | 3.39597200  | 3.24567400  |
| Cu | -0.85954500 | 0.75938200  | 0.92101100  | N                                            | 0.18139800  | 1.58008100  | 4.26341800  |
| N  | -3.30745100 | -0.58925300 | 0.12356000  | H                                            | -0.63656600 | 1.02658200  | 4.52213300  |
| C  | -2.07683400 | -2.12489300 | -1.34773800 | H                                            | 0.46747500  | 1.26634900  | 3.32285900  |
| C  | -2.59323100 | -1.83232500 | -0.07194500 | H                                            | 0.91677400  | 1.32820500  | 4.92621800  |
| C  | -3.70140400 | 1.65042700  | 0.45870800  | O                                            | 1.18781400  | 3.85577700  | 4.25179200  |
| C  | -2.04660100 | -1.11598300 | -2.47835000 | H                                            | 1.30648600  | 4.52424300  | 3.55976500  |
| C  | -2.41555000 | -2.69614700 | 1.02226600  | H                                            | 1.48018000  | 4.23194600  | 5.09712800  |
| C  | -5.07650500 | 0.96414000  | 0.33583400  | <b>TS7</b>                                   |             |             |             |
| C  | -3.36487900 | 2.47352100  | -0.80913800 | E <sub>solv</sub> = -2464.904311 a.u.        |             |             |             |
| C  | -2.70794100 | 0.51801100  | 0.46383400  | Zero-point energy correction = 1.116938 a.u. |             |             |             |
| C  | -4.81744700 | -0.48884900 | -0.09143600 | Cu                                           | -1.25046300 | 0.47440300  | 0.53291200  |
| C  | -2.77146100 | -2.31065500 | 2.44340100  | N                                            | -3.58601400 | -0.70780400 | -0.47206200 |
| C  | -1.35075600 | -4.27156000 | -0.48206300 | C                                            | -4.49149300 | -0.21656000 | 1.76400500  |
| C  | -1.78990700 | -3.92199800 | 0.78668000  | C                                            | -4.25468400 | 0.19574200  | 0.44091800  |
| C  | -3.56138500 | 2.50245500  | 1.72722300  | C                                            | -1.88633800 | -1.83305400 | -1.53408700 |
| C  | -1.47206400 | -3.36921700 | -1.53006700 | C                                            | -3.98048500 | -1.52611900 | 2.32963400  |

|    |             |             |             |                                              |             |             |             |
|----|-------------|-------------|-------------|----------------------------------------------|-------------|-------------|-------------|
| C  | -4.57438000 | 1.48947100  | -0.00799200 | C                                            | 2.55654500  | -3.47912400 | 3.04103100  |
| C  | -3.20237900 | -2.15986900 | -2.26766200 | C                                            | 5.30621000  | -1.43410600 | 2.16343300  |
| C  | -1.36363400 | -2.98898000 | -0.64063100 | C                                            | 2.70821200  | -0.18445700 | -3.32388700 |
| C  | -2.28132900 | -0.74482400 | -0.56394400 | C                                            | 4.25183400  | 2.98903700  | -0.78480400 |
| C  | -4.34326900 | -1.68647500 | -1.36408300 | C                                            | 6.14541000  | -0.76212600 | -0.06372200 |
| C  | -4.16243800 | 2.02735400  | -1.36445900 | C                                            | 4.94748500  | -1.31347500 | -3.39416100 |
| C  | -5.51344200 | 1.94328100  | 2.18197700  | C                                            | 0.70125000  | -1.98181900 | 2.26947700  |
| C  | -5.21709200 | 2.34590800  | 0.88726200  | C                                            | 3.60526300  | 2.76678000  | 3.66787500  |
| C  | -0.76052500 | -1.37523300 | -2.47152400 | H                                            | 2.74217600  | -1.44249800 | 2.43409700  |
| C  | -5.13732100 | 0.68035000  | 2.61660300  | H                                            | 3.16384600  | 0.70981000  | 3.19849200  |
| C  | -5.05221200 | -2.30457100 | 3.08702100  | H                                            | 4.52660700  | 3.65875800  | 1.24413100  |
| C  | -4.95389300 | -2.81515300 | -0.54331700 | H                                            | 0.06191100  | -2.85185500 | 2.06483100  |
| C  | -3.00041000 | 3.01096700  | -1.21429300 | H                                            | 2.87259000  | -3.19845500 | -3.16925900 |
| C  | -1.10726800 | -0.21181600 | -3.38692100 | H                                            | 2.01148500  | 1.85098700  | 2.53920300  |
| C  | -5.45040400 | -0.98327400 | -2.12982000 | H                                            | 5.59000900  | 1.07715000  | 2.52574200  |
| C  | -5.32087300 | 2.67721000  | -2.11618600 | H                                            | 3.60956600  | -3.76450900 | 2.93874300  |
| C  | -2.76229700 | -1.27961500 | 3.21992300  | H                                            | 7.15154300  | -0.69313800 | 0.36381700  |
| C  | -1.24599100 | -4.33868300 | -1.32950000 | H                                            | 6.34815400  | -1.39384600 | 2.49882100  |
| H  | -3.64072000 | -2.15312500 | 1.49959000  | H                                            | 5.95164600  | 1.56792600  | 0.87758800  |
| H  | -1.99726400 | -3.09714700 | 0.25397400  | H                                            | 5.21101900  | 2.47817800  | -0.93944400 |
| H  | -0.42747200 | -2.23155800 | -3.07558000 | H                                            | 4.68892800  | 2.68913900  | 3.81886100  |
| H  | -3.00996200 | -0.62121000 | 4.06284900  | H                                            | 4.25624400  | 0.03018800  | -1.88407600 |
| H  | -5.47543100 | 3.35353600  | 0.56721000  | H                                            | 0.40196300  | -1.18114500 | 1.57594400  |
| H  | -0.37685600 | -2.68264900 | -0.26434000 | H                                            | 6.09118900  | -0.05576400 | -0.89911100 |
| H  | -3.30406400 | -3.22085200 | -2.51663400 | H                                            | 3.50495600  | 2.47426500  | -1.40837400 |
| H  | -5.95470900 | -2.45313100 | 2.48252600  | H                                            | 3.39034700  | 3.77607400  | 3.29956900  |
| H  | -5.94314900 | -1.71710500 | -2.77697700 | H                                            | 1.94739900  | -4.36933900 | 2.84246100  |
| H  | -5.49716700 | -3.47852700 | -1.22518400 | H                                            | 2.84264000  | 3.47410500  | 0.76853500  |
| H  | -3.24720200 | -1.60894600 | -3.21410800 | H                                            | 1.54137000  | -4.51489200 | 0.67872000  |
| H  | -1.80777700 | -0.49432800 | -4.17992200 | H                                            | 4.56676000  | -2.06390700 | -4.09766200 |
| H  | -2.22480300 | -4.77144700 | -1.56565200 | H                                            | 0.49113900  | -1.63903200 | 3.29123200  |
| H  | -3.79443200 | 1.19389900  | -1.97611500 | H                                            | 4.67526600  | -1.20315600 | 3.02780400  |
| H  | -1.94521600 | -0.80590600 | 2.65627700  | H                                            | 3.08670100  | 0.62717900  | -3.95742700 |
| H  | -5.06620900 | -0.18380500 | -2.77151500 | H                                            | 2.25005300  | -0.94049100 | -3.97546300 |
| H  | -1.56318700 | 0.62063100  | -2.83091600 | H                                            | 5.76035000  | -1.77404200 | -2.82163200 |
| H  | -0.67193600 | -4.27679900 | -2.26203400 | H                                            | 5.10560300  | -2.45969100 | 1.83270600  |
| H  | -5.34959800 | -1.79091600 | 4.00953600  | H                                            | 1.91405500  | 0.22639900  | -2.68346300 |
| H  | 0.10329700  | -1.10537500 | -1.83975200 | H                                            | 1.85130000  | -4.92926900 | -1.73684900 |
| H  | -5.33295200 | 0.38711600  | 3.64620700  | H                                            | 2.38197800  | -3.19183900 | 4.08428200  |
| H  | -5.66319800 | 3.59239600  | -1.61823700 | H                                            | 3.12835400  | 2.66548800  | 4.64751300  |
| H  | -2.38644300 | -2.22783300 | 3.62392800  | H                                            | 5.37029700  | -0.49437900 | -3.98732400 |
| H  | -4.20190700 | -3.42034800 | -0.02620000 | H                                            | 4.37896800  | 4.00631200  | -1.17170900 |
| H  | -2.72241800 | 3.42881300  | -2.19042500 | H                                            | 6.01383000  | -1.78187900 | -0.44490000 |
| H  | -3.26063100 | 3.84708100  | -0.55154000 | B                                            | -0.96118100 | 1.92006900  | 2.18189000  |
| H  | -6.17927200 | 2.00107400  | -2.20061900 | H                                            | -0.09030600 | 1.17536500  | 1.64824700  |
| H  | -5.67388800 | -2.43402100 | 0.18996400  | H                                            | -0.93673700 | 1.68867500  | 3.36207400  |
| H  | -2.11170100 | 2.51758800  | -0.79104400 | H                                            | -2.08881200 | 1.78588200  | 1.71770400  |
| H  | -6.01935300 | 2.62472700  | 2.86155300  | N                                            | -0.50463800 | 3.42922400  | 1.90320000  |
| H  | -4.66770600 | -3.29022900 | 3.37301600  | H                                            | -1.22758100 | 4.08238800  | 2.20542900  |
| H  | -0.73091300 | -5.04888200 | -0.67327700 | H                                            | 0.33870200  | 3.68125500  | 2.41952800  |
| H  | -5.00399400 | 2.95546500  | -3.12779900 | H                                            | -0.31114100 | 3.63751000  | 0.91814000  |
| H  | -0.20736100 | 0.17367700  | -3.88041600 | B                                            | 0.52140200  | 4.20193700  | -1.51568300 |
| H  | -6.21007100 | -0.57025300 | -1.45536600 | H                                            | -0.51152200 | 4.81630400  | -1.39365900 |
| H  | 0.03774200  | 1.24165400  | -1.16113600 | H                                            | 0.98699600  | 3.78728100  | -0.46762500 |
| Cu | 1.34118000  | 0.94486600  | -0.27817800 | N                                            | 1.62975200  | 5.18633900  | -2.13623700 |
| N  | 3.72114900  | -0.47441600 | 0.44889200  | H                                            | 1.86677000  | 5.93335100  | -1.48349800 |
| C  | 2.50899700  | -2.59732800 | 0.65842700  | H                                            | 2.49429300  | 4.68762200  | -2.35066400 |
| C  | 3.17333300  | -1.66700300 | -0.16324200 | H                                            | 1.32311500  | 5.63515200  | -2.99956400 |
| C  | 3.81817700  | 1.63785600  | 1.35498600  | O                                            | 0.42109400  | 3.03652900  | -2.43581200 |
| C  | 2.18224200  | -2.32700100 | 2.11376400  | H                                            | 0.29040400  | 2.00133700  | -1.72140100 |
| C  | 3.29032800  | -1.84493700 | -1.55297700 | H                                            | -0.28805000 | 3.10639500  | -3.08784700 |
| C  | 5.22650000  | 1.02249200  | 1.49301200  | <b>TS7-a</b>                                 |             |             |             |
| C  | 3.08724100  | 1.69821900  | 2.71935500  | $E_{\text{solv}} = -2464.878561$ a.u.        |             |             |             |
| C  | 3.04109600  | 0.63464600  | 0.54483900  | Zero-point energy correction = 1.117697 a.u. |             |             |             |
| C  | 5.13676800  | -0.43840300 | 1.02643200  | Cu                                           | -1.30180400 | 0.47784000  | 0.52039200  |
| C  | 3.83871400  | -0.78516700 | -2.48775800 | N                                            | -3.63715100 | -0.70643400 | -0.44031600 |
| C  | 2.21119300  | -4.00281000 | -1.29526500 | C                                            | -4.52395400 | -0.05906500 | 1.76464200  |
| C  | 2.79772100  | -3.03388000 | -2.09592600 | C                                            | -4.28172500 | 0.26573000  | 0.41860400  |
| C  | 3.83946900  | 3.01462600  | 0.67909500  | C                                            | -1.96024300 | -1.91698700 | -1.44463400 |
| C  | 2.05136700  | -3.77391800 | 0.06485100  | C                                            | -4.04659900 | -1.34597600 | 2.40676200  |

|    |             |             |             |                                               |             |             |             |
|----|-------------|-------------|-------------|-----------------------------------------------|-------------|-------------|-------------|
| C  | -4.56661800 | 1.53787400  | -0.10893400 | C                                             | 2.47588800  | -3.29181700 | 3.22300800  |
| C  | -3.28670000 | -2.27411800 | -2.14510900 | C                                             | 5.27944500  | -1.39009700 | 2.22946700  |
| C  | -1.44327900 | -3.01935900 | -0.48320900 | C                                             | 2.73382900  | -0.42372600 | -3.35826300 |
| C  | -2.33466600 | -0.76846400 | -0.53864400 | C                                             | 4.35275900  | 2.89532500  | -0.98754800 |
| C  | -4.41579600 | -1.72126400 | -1.27215700 | C                                             | 6.14057400  | -0.89815900 | -0.03617500 |
| C  | -4.13918000 | 1.97680700  | -1.49534400 | C                                             | 4.94800100  | -1.59697800 | -3.31554300 |
| C  | -5.48124600 | 2.15132900  | 2.05180200  | C                                             | 0.66450400  | -1.79763600 | 2.35364600  |
| C  | -5.17979200 | 2.46597800  | 0.73382600  | C                                             | 3.73342300  | 2.93355400  | 3.47371300  |
| C  | -0.84460700 | -1.53392600 | -2.42691600 | H                                             | 2.71795100  | -1.30137500 | 2.49248100  |
| C  | -5.14009800 | 0.90689300  | 2.56222200  | H                                             | 3.20435000  | 0.87493200  | 3.11430600  |
| C  | -5.13545400 | -2.04505600 | 3.21535100  | H                                             | 4.73498300  | 3.63966900  | 0.99902200  |
| C  | -5.04815000 | -2.78492300 | -0.38395100 | H                                             | 0.00306500  | -2.66071200 | 2.19472000  |
| C  | -2.93758800 | 2.91765900  | -1.40104200 | H                                             | 2.81211300  | -3.40800300 | -2.99087100 |
| C  | -1.17521100 | -0.39219500 | -3.37696500 | H                                             | 2.10926200  | 2.02989000  | 2.38149300  |
| C  | -5.50929700 | -1.04122400 | -2.07752500 | H                                             | 5.66840400  | 1.12666400  | 2.42227500  |
| C  | -5.27098200 | 2.62775800  | -2.28505100 | H                                             | 3.571943800 | -3.61565800 | 3.14144000  |
| C  | -2.81512400 | -1.08248900 | 3.27376500  | H                                             | 7.14922500  | -0.83474200 | 0.38620000  |
| C  | -1.32314500 | -4.40722300 | -1.09045000 | H                                             | 6.32279500  | -1.36588000 | 2.56212400  |
| H  | -3.73117400 | -2.03218400 | 1.61483700  | H                                             | 6.03002800  | 1.49336600  | 0.74098100  |
| H  | -2.08426900 | -3.07404700 | 0.41116400  | H                                             | 5.31065000  | 2.38054600  | -1.13973200 |
| H  | -0.56760500 | -2.42349600 | -3.01070800 | H                                             | 4.80978400  | 2.81168000  | 3.64608300  |
| H  | -3.03267700 | -0.35848600 | 4.06994300  | H                                             | 4.26609300  | -0.13579200 | -1.91255600 |
| H  | -5.41113900 | 3.45903700  | 0.35336500  | H                                             | 0.39217700  | -1.03061200 | 1.61252100  |
| H  | -0.45852400 | -2.69200800 | -0.11882500 | H                                             | 6.10825000  | -0.24806300 | -0.91717800 |
| H  | -3.40478000 | -3.34892000 | -2.31506700 | H                                             | 3.58652500  | 2.33387000  | -1.54179800 |
| H  | -6.04442400 | -2.20615100 | 2.62393000  | H                                             | 3.57402100  | 3.92801700  | 3.04277700  |
| H  | -6.01941400 | -1.80211100 | -2.67822100 | H                                             | 1.83965100  | -4.17358700 | 3.07964900  |
| H  | -5.60777300 | -3.47542100 | -1.02423700 | H                                             | 3.02983600  | 3.53917500  | 0.58284400  |
| H  | -3.32850200 | -1.79453800 | -3.12964500 | H                                             | 1.44621600  | -4.44620400 | 0.92869900  |
| H  | -1.90863100 | -0.67959500 | -4.13793500 | H                                             | 4.55937700  | -2.38793900 | -3.96847600 |
| H  | -2.30101100 | -4.84699200 | -1.31705200 | H                                             | 0.45956400  | -1.39116600 | 3.35264700  |
| H  | -3.80609500 | 1.09527900  | -2.05726300 | H                                             | 4.65947800  | -1.07872300 | 3.07625300  |
| H  | -1.98397300 | -0.67932000 | 2.67654700  | H                                             | 3.13698900  | 0.34052500  | -4.03422200 |
| H  | -5.11055500 | -0.29027700 | -2.76714600 | H                                             | 2.27857800  | -1.21285200 | -3.97132100 |
| H  | -1.58177400 | 0.48203900  | -2.84763300 | H                                             | 5.74493700  | -2.03186800 | -2.70251000 |
| H  | -0.73272500 | -4.40347300 | -2.01448300 | H                                             | 5.04095800  | -2.42742500 | 1.96807000  |
| H  | -5.41440800 | -1.46635100 | 4.10438500  | H                                             | 1.93254800  | 0.03651500  | -2.76304600 |
| H  | 0.05153500  | -1.28179600 | -1.83376100 | H                                             | 1.75002900  | -5.02044100 | -1.45461600 |
| H  | -5.33867700 | 0.68392800  | 3.60873300  | H                                             | 2.30971700  | -2.93428800 | 4.24569200  |
| H  | -5.57782200 | 3.58199000  | -1.84006900 | H                                             | 3.23941200  | 2.91373200  | 4.44993100  |
| H  | -2.46965600 | -2.01349800 | 3.73987100  | H                                             | 5.39371100  | -0.83054000 | -3.96006200 |
| H  | -4.30722400 | -3.37492000 | 0.16593200  | H                                             | 4.43409800  | 3.88213900  | -1.45402800 |
| H  | -2.62056000 | 3.24117600  | -2.40034500 | H                                             | 5.97324700  | -1.93627000 | -0.34704000 |
| H  | -3.17362400 | 3.81397200  | -0.81134200 | B                                             | -0.83546700 | 2.00117300  | 2.04042600  |
| H  | -6.15487500 | 1.98156600  | -2.33385100 | H                                             | -0.01484600 | 1.30640600  | 1.36693500  |
| H  | -5.75747400 | -2.34546700 | 0.32673700  | H                                             | -0.59129200 | 1.78546800  | 3.19784900  |
| H  | -2.07697500 | 2.42240300  | -0.92294300 | H                                             | -2.01367400 | 1.77813700  | 1.77331300  |
| H  | -5.96371200 | 2.88755600  | 2.68997100  | N                                             | -0.53455700 | 3.52534300  | 1.67302900  |
| H  | -4.77678500 | -3.02105000 | 3.56152700  | H                                             | -1.23064200 | 4.13981400  | 2.09541500  |
| H  | -0.82429700 | -5.08064400 | -0.38482600 | H                                             | 0.37161600  | 3.83521700  | 2.02667800  |
| H  | -4.94286300 | 2.83631800  | -3.30967900 | H                                             | -0.53248700 | 3.72201500  | 0.66587700  |
| H  | -0.27655300 | -0.05978600 | -3.91007500 | B                                             | 0.68343800  | 3.90624200  | -1.51354600 |
| H  | -6.25806700 | -0.57235900 | -1.42788700 | H                                             | 1.25506900  | 3.37843200  | -0.56791800 |
| H  | 0.08967300  | 0.96396200  | -1.36932800 | H                                             | -0.41004500 | 4.34960100  | -1.22751200 |
| Cu | 1.39611900  | 0.95036300  | -0.36717100 | N                                             | 0.66718500  | 3.03805500  | -2.71817700 |
| N  | 3.72961400  | -0.48439700 | 0.45125800  | H                                             | 1.56608900  | 2.82719200  | -3.14201200 |
| C  | 2.45778900  | -2.55632100 | 0.78947200  | H                                             | 0.36889100  | 1.63403700  | -1.82427900 |
| C  | 3.14461200  | -1.69507500 | -0.08745400 | H                                             | -0.00095300 | 3.25561800  | -3.44819900 |
| C  | 3.90882000  | 1.67532700  | 1.22653300  | O                                             | 1.66427900  | 5.19507900  | -1.78012700 |
| C  | 2.13629700  | -2.18926500 | 2.22469200  | H                                             | 1.31273800  | 5.82470300  | -2.42893500 |
| C  | 3.25953400  | -1.96441800 | -1.46303600 | H                                             | 1.86319000  | 5.69377400  | -0.97249900 |
| C  | 5.29299400  | 1.01658900  | 1.39814600  | <b>INT6</b>                                   |             |             |             |
| C  | 3.17530400  | 1.83781800  | 2.58091500  | $E_{\text{solv}} = -2380.524526 \text{ a.u.}$ |             |             |             |
| C  | 3.09414200  | 0.65510700  | 0.47324300  | Zero-point energy correction = 1.036285 a.u.  |             |             |             |
| C  | 5.14633000  | -0.46604200 | 1.02909000  | Cu                                            | 1.51450000  | -0.24550000 | -0.52224900 |
| C  | 3.83978900  | -0.98393700 | -2.46299200 | N                                             | 4.08091600  | 0.49332300  | 0.29332400  |
| C  | 2.12939800  | -4.07574600 | -1.07192900 | C                                             | 4.07401800  | -1.74504100 | 1.33102300  |
| C  | 2.73932800  | -3.17338700 | -1.93054700 | C                                             | 4.35798500  | -0.92784300 | 0.21924200  |
| C  | 3.99194100  | 3.01520700  | 0.48427600  | C                                             | 2.85991700  | 2.44446800  | 0.19095000  |
| C  | 1.97331900  | -3.75722900 | 0.27033500  | C                                             | 3.46440800  | -1.24125900 | 2.62451100  |



|    |             |             |             |                                              |            |             |             |
|----|-------------|-------------|-------------|----------------------------------------------|------------|-------------|-------------|
| C  | -5.32810100 | -1.12343900 | -3.36514900 | C                                            | 5.83213500 | 0.43596200  | 1.62021700  |
| C  | -5.50929500 | 1.85045700  | -1.31935900 | C                                            | 3.20088200 | 0.98847900  | 4.14991000  |
| C  | -2.34521900 | -0.97703700 | 3.08640900  | C                                            | 1.85823500 | 1.70081200  | -2.73007200 |
| C  | -1.36702600 | 2.67119800  | 1.97158700  | C                                            | 5.04432200 | -3.31123900 | -2.62527700 |
| C  | -5.44480900 | 1.99188200  | 1.15089600  | H                                            | 3.81084100 | 1.11853300  | -2.13130200 |
| C  | -4.70307700 | -0.42440600 | 3.75650300  | H                                            | 4.49157500 | -1.22848000 | -2.57314300 |
| C  | -2.87916600 | -1.59424600 | -3.08196400 | H                                            | 4.57775400 | -4.04336900 | -0.02890700 |
| C  | -1.31987900 | 4.07835200  | -2.28902700 | H                                            | 1.19232600 | 2.57457100  | -2.70585200 |
| H  | -3.89434100 | 0.15109000  | -2.43652000 | H                                            | 1.89175900 | 3.11769200  | 3.05327700  |
| H  | -2.55884900 | 2.33800100  | -2.58518700 | H                                            | 3.13463200 | -2.33528300 | -2.41561300 |
| H  | -1.02064700 | 4.08273200  | 0.38318400  | H                                            | 6.35521000 | -1.58357400 | -0.81658000 |
| H  | -3.00910800 | -2.68373400 | -3.13636200 | H                                            | 4.86454300 | 3.41005300  | -2.35926800 |
| H  | -4.67259700 | -2.91377800 | 2.52331800  | H                                            | 6.91988200 | 0.31446000  | 1.66533700  |
| H  | -0.90484300 | 1.97299400  | -2.11245600 | H                                            | 7.13364600 | 0.85700300  | -0.66292200 |
| H  | -3.88157500 | 3.79018800  | -1.00393600 | H                                            | 5.88806000 | -1.96497900 | 0.83449900  |
| H  | -6.22980200 | -0.67506300 | -2.93259000 | H                                            | 4.41884900 | -2.80252900 | 2.17258300  |
| H  | -6.11950300 | 2.85126800  | 1.07335600  | H                                            | 6.08270900 | -3.22607000 | -2.28220900 |
| H  | -6.19314100 | 2.70579700  | -1.29840300 | H                                            | 3.31775500 | -0.28539700 | 2.44435100  |
| H  | -3.60251200 | 3.68172200  | 0.72818800  | H                                            | 1.34519100 | 0.87235800  | -2.21577800 |
| H  | -2.31997400 | 3.07851200  | 2.33325800  | H                                            | 5.39587600 | -0.20565400 | 2.39335400  |
| H  | -2.09466500 | 4.81435200  | -2.04047500 | H                                            | 2.71878500 | -2.43821000 | 1.83153800  |
| H  | -3.50688000 | 0.63272200  | 2.34244800  | H                                            | 4.66656800 | -4.28868900 | -2.30654000 |
| H  | -1.97023700 | -1.37494300 | -2.49951100 | H                                            | 3.30435100 | 4.02856200  | -2.92915900 |
| H  | -4.84322400 | 2.12741100  | 2.05567000  | H                                            | 2.88693300 | -3.67941300 | -0.35912900 |
| H  | -1.37701100 | 1.58705000  | 2.15111000  | H                                            | 2.28684100 | 4.35004000  | -1.02577900 |
| H  | -0.40062400 | 4.37378400  | -1.76835300 | H                                            | 2.54283600 | 1.73756400  | 4.60683900  |
| H  | -5.53276400 | -2.18757000 | -3.53469600 | H                                            | 2.00198400 | 1.41184200  | -3.77802200 |
| H  | -0.14925600 | 2.56440400  | 0.19689500  | H                                            | 5.81684500 | 0.66906600  | -1.82565500 |
| H  | -4.95868100 | -3.35773200 | -1.72243800 | H                                            | 1.20866700 | -0.82461200 | 3.59913800  |
| H  | -4.84680600 | -1.43414400 | 4.15979700  | H                                            | 0.57449200 | 0.79726000  | 3.24213700  |
| H  | -2.70940900 | -1.22930300 | -4.10167700 | H                                            | 4.20758500 | 1.41753000  | 4.08945100  |
| H  | -4.95745700 | 1.89401600  | -2.26444400 | H                                            | 5.78832700 | 2.00475400  | -0.63982200 |
| H  | -1.97671700 | -0.41840800 | 3.95572800  | H                                            | 0.88428900 | -0.34090300 | 1.91553400  |
| H  | -2.43834600 | -2.03227200 | 3.37608300  | H                                            | 1.70487300 | 4.86393800  | 1.31801500  |
| H  | -5.68105900 | -0.05050600 | 3.43275600  | H                                            | 4.14563900 | 2.78497400  | -3.85609500 |
| H  | -6.11756400 | 0.93831800  | -1.29851400 | H                                            | 5.05902500 | -3.30532800 | -3.71954100 |
| H  | -1.58403700 | -0.90543700 | 2.29366300  | H                                            | 3.23588100 | 0.13018500  | 4.83035100  |
| H  | -5.24433800 | -4.28134400 | 0.54868900  | H                                            | 3.23881900 | -4.10977900 | 2.06682700  |
| H  | -5.15542400 | -0.66316500 | -4.34463400 | H                                            | 5.60355400 | 1.48317700  | 1.85113100  |
| H  | -1.12631000 | 4.15140300  | -3.36414200 | O                                            | 0.08671300 | -3.69151700 | 1.33799700  |
| H  | -4.35147200 | 0.20824500  | 4.57947300  | H                                            | 0.05473700 | -3.27656800 | 2.20914100  |
| H  | -0.57635100 | 3.09587800  | 2.59980800  | <b>TS8</b>                                   |            |             |             |
| H  | -6.06313200 | 1.09258200  | 1.25960800  | $E_{\text{solv}} = -2456.964011$ a.u.        |            |             |             |
| B  | -0.95271800 | -3.44455300 | 0.55173000  | Zero-point energy correction = 1.055095 a.u. |            |             |             |
| H  | -0.15242600 | -1.62432100 | -0.71832300 | Cu                                           | 0.98984900 | 0.16096100  | -0.55301700 |
| H  | -1.94394800 | -2.84676400 | 0.79656200  | N                                            | 3.52662200 | -1.07053600 | -0.02486600 |
| N  | -0.90066100 | -4.20776200 | -0.79277200 | C                                            | 4.54482900 | 0.96016300  | -0.97563700 |
| H  | -1.46495600 | -5.06302500 | -0.74407900 | C                                            | 4.10740000 | 0.24415000  | 0.15262900  |
| H  | -1.28051700 | -3.65887900 | -1.56868300 | C                                            | 1.95776100 | -2.70527000 | -0.44423700 |
| H  | 0.05120000  | -4.49243600 | -1.04123900 | C                                            | 4.27794000 | 0.51447500  | -2.39920600 |
| Cu | 1.33076500  | -1.10191800 | -0.47259600 | C                                            | 4.18243200 | 0.77808400  | 1.45269900  |
| N  | 3.84573200  | 0.17333800  | 0.11559500  | C                                            | 3.28550400 | -3.42391900 | -0.11925500 |
| C  | 2.97431100  | 2.35591300  | -0.60796000 | C                                            | 1.54131000 | -2.88837800 | -1.92098300 |
| C  | 3.16985900  | 1.41585000  | 0.41945900  | C                                            | 2.25814200 | -1.24461200 | -0.27065300 |
| C  | 4.20999300  | -1.99528300 | -0.56852700 | C                                            | 4.37261400 | -2.34428400 | 0.01451300  |
| C  | 3.19902100  | 2.02506900  | -2.06925600 | C                                            | 3.51846500 | 0.12887000  | 2.65000900  |
| C  | 2.73449700  | 1.64332400  | 1.73672300  | C                                            | 5.34119400 | 2.69499100  | 0.52457700  |
| C  | 5.56276000  | -1.44236000 | -0.07269300 | C                                            | 4.81497400 | 2.01114600  | 1.61355200  |
| C  | 4.17903800  | -2.17477400 | -2.10460400 | C                                            | 0.80754800 | -3.09837600 | 0.49421700  |
| C  | 3.22082100  | -0.90182800 | -0.27123500 | C                                            | 5.17513500 | 2.18859800  | -0.75816500 |
| C  | 5.36582800  | 0.05203400  | 0.22569800  | C                                            | 5.51894700 | 0.56800400  | -3.28563000 |
| C  | 2.68994500  | 0.54788800  | 2.78242300  | C                                            | 5.35190700 | -2.35481900 | -1.15001300 |
| C  | 2.10445200  | 3.88535100  | 1.06079500  | C                                            | 2.21971100 | 0.86444100  | 2.98713000  |
| C  | 2.21967400  | 2.90532400  | 2.03724200  | C                                            | 1.03298900 | -2.75480300 | 1.95706400  |
| C  | 3.79203800  | -3.29385500 | 0.13721100  | C                                            | 5.14844700 | -2.44601400 | 1.31657800  |
| C  | 2.44473400  | 3.59843400  | -0.25427500 | C                                            | 4.42506900 | 0.05522400  | 3.87443000  |
| C  | 3.92094700  | 3.12578800  | -2.83917200 | C                                            | 3.15091200 | 1.35374900  | -3.00370600 |
| C  | 6.05010300  | 0.95123500  | -0.79334200 | C                                            | 1.02745600 | -4.27730400 | -2.26376500 |
| C  | 1.25948600  | 0.01349400  | 2.89157100  | H                                            | 3.92530800 | -0.52246700 | -2.37996900 |
| C  | 3.53123400  | -3.15042800 | 1.62872200  | H                                            | 2.40445500 | -2.64355700 | -2.55949300 |

|    |             |             |             |                                                     |             |             |             |
|----|-------------|-------------|-------------|-----------------------------------------------------|-------------|-------------|-------------|
| H  | 0.63654400  | -4.17942200 | 0.39368300  | H                                                   | -6.34510500 | 1.95095600  | -0.70244700 |
| H  | 3.40673900  | 2.42199900  | -3.00078000 | H                                                   | -5.17509900 | -3.15798100 | -2.38189200 |
| H  | 4.89615900  | 2.44339100  | 2.60867000  | H                                                   | -7.06848600 | -0.02722700 | 1.60754900  |
| H  | 0.76536100  | -2.14407400 | -2.16116800 | H                                                   | -7.26057500 | -0.43710400 | -0.75302700 |
| H  | 3.55475500  | -4.14023800 | -0.90430800 | H                                                   | -5.77470200 | 2.20864900  | 0.94121500  |
| H  | 6.35886100  | 0.01712200  | -2.84740700 | H                                                   | -4.18636100 | 2.91748500  | 2.23133000  |
| H  | 5.73836400  | -3.36862600 | 1.29360600  | H                                                   | -5.96261200 | 3.56994100  | -2.17493700 |
| H  | 5.95117500  | -3.26953500 | -1.08853200 | H                                                   | -3.46127000 | 0.35336300  | 2.45006800  |
| H  | 3.20687300  | -3.99591700 | 0.81242100  | H                                                   | -1.45331200 | -0.93052800 | -2.21436500 |
| H  | 1.94141200  | -3.21933700 | 2.36154900  | H                                                   | -5.53012500 | 0.32932100  | 2.39947500  |
| H  | 1.73673400  | -5.06166400 | -1.97136900 | H                                                   | -2.52361700 | 2.47126100  | 1.80594400  |
| H  | 3.23675400  | -0.89490300 | 2.38078200  | H                                                   | -4.45968100 | 4.50427200  | -2.23064200 |
| H  | 2.21322500  | 1.22546800  | -2.43996200 | H                                                   | -3.67038300 | -3.91307700 | -2.93481300 |
| H  | 4.49093400  | -2.49840500 | 2.19057500  | H                                                   | -2.71535200 | 3.74084300  | -0.35460600 |
| H  | 1.11401800  | -1.66971600 | 2.11030200  | H                                                   | -2.63280100 | -4.29941800 | -1.04305200 |
| H  | 0.07282500  | -4.48966800 | -1.76687300 | H                                                   | -2.84492500 | -1.72559200 | 4.61088800  |
| H  | 5.84859300  | 1.59941800  | -3.45963600 | H                                                   | -2.13755800 | -1.42316900 | -3.78003500 |
| H  | -0.11525600 | -2.60867100 | 0.13857800  | H                                                   | -5.89796600 | -0.29352600 | -1.87000200 |
| H  | 5.54226900  | 2.75681600  | -1.61077000 | H                                                   | -1.34624000 | 0.79005900  | 3.61032900  |
| H  | 4.64116900  | 1.05054900  | 4.28104600  | H                                                   | -0.80397900 | -0.87698600 | 3.31589400  |
| H  | 2.95752600  | 1.05158900  | -4.03944800 | H                                                   | -4.47767500 | -1.29606600 | 4.07085300  |
| H  | 4.84494500  | -2.35718600 | -2.12106500 | H                                                   | -6.00412100 | -1.68240400 | -0.75336300 |
| H  | 1.72364700  | 0.39623300  | 3.84594200  | H                                                   | -1.01533500 | 0.23465800  | 1.94970800  |
| H  | 2.42145300  | 1.91411100  | 3.24356400  | H                                                   | -2.12214700 | -4.86893600 | 1.30353400  |
| H  | 5.38089600  | -0.42803100 | 3.64301500  | H                                                   | -4.39048900 | -2.60334900 | -3.87335500 |
| H  | 6.04121700  | -1.50330100 | -1.10464300 | H                                                   | -4.97766400 | 3.57740100  | -3.64127000 |
| H  | 1.52000200  | 0.83325100  | 2.13646000  | H                                                   | -3.43743500 | -0.07886000 | 4.83708600  |
| H  | 5.87475100  | 3.63198700  | 0.67716600  | H                                                   | -2.94394900 | 4.16182900  | 2.09004600  |
| H  | 5.29758700  | 0.12830000  | -4.26455700 | H                                                   | -5.85403600 | -1.30556200 | 1.75878900  |
| H  | 0.86262400  | -4.36525900 | -3.34245700 | O                                                   | 3.13590900  | 5.14456200  | -0.10298500 |
| H  | 3.93485400  | -0.52032500 | 4.66759600  | H                                                   | 3.19241400  | 5.70737500  | 0.67656000  |
| H  | 0.19325600  | -3.10552100 | 2.56673500  | H                                                   | 3.84320800  | 4.49294400  | -0.00900300 |
| H  | 5.84646500  | -1.60915000 | 1.43902100  | O                                                   | 0.30558400  | 3.39172700  | 1.28785200  |
| B  | 1.12031500  | 3.14932400  | 0.26510500  | H                                                   | 0.50853800  | 2.90534600  | 2.09649200  |
| H  | 0.10227400  | 1.38759200  | -1.03690300 | <b>TS9</b>                                          |             |             |             |
| H  | 2.07669600  | 2.44517700  | 0.25134100  | $E_{\text{solv}} = -2540.184903 \text{ a.u.}$       |             |             |             |
| N  | 0.84133400  | 4.00356700  | -0.97672500 | <b>Zero-point energy correction = 1.123077 a.u.</b> |             |             |             |
| H  | 1.61673100  | 4.69987200  | -0.96797200 | Cu                                                  | -1.25614600 | 0.30550400  | 0.64970800  |
| H  | 0.89104700  | 3.48579500  | -1.85549300 | N                                                   | -3.56222900 | -0.76887400 | -0.52989100 |
| H  | -0.05583100 | 4.49182500  | -0.94098500 | C                                                   | -4.51406900 | -0.52942000 | 1.72960300  |
| Cu | -1.36716400 | 1.02239200  | -0.56589100 | C                                                   | -4.25601600 | 0.02320400  | 0.46363400  |
| N  | -3.95465900 | -0.04321800 | 0.12146200  | C                                                   | -1.83392700 | -1.72497100 | -1.70392300 |
| C  | -3.21362600 | -2.27323300 | -0.61639600 | C                                                   | -4.00895400 | -1.89220300 | 2.15781200  |
| C  | -3.37001400 | -1.33304200 | 0.41703000  | C                                                   | -4.57693100 | 1.35530300  | 0.14655500  |
| C  | -4.16019400 | 2.15597200  | -0.53082800 | C                                                   | -3.13664000 | -1.96946300 | -2.49093600 |
| C  | -3.39717800 | -1.92352300 | -2.07904200 | C                                                   | -1.30575500 | -2.97977200 | -0.95920300 |
| C  | -2.97649900 | -1.60028200 | 1.74021100  | C                                                   | -2.25622900 | -0.77363200 | -0.60953500 |
| C  | -5.53784400 | 1.70424900  | -0.00319900 | C                                                   | -4.29190100 | -1.64809900 | -1.54150800 |
| C  | -4.15528000 | 2.35291100  | -2.06498600 | C                                                   | -4.13864100 | 2.03168700  | -1.13752000 |
| C  | -3.25394900 | 0.98462700  | -0.26449700 | C                                                   | -5.55607500 | 1.57018900  | 2.35466700  |
| C  | -5.46225200 | 0.18689200  | 0.22094400  | C                                                   | -5.24130800 | 2.10927400  | 1.11476700  |
| C  | -2.88804200 | -0.51590700 | 2.79434800  | C                                                   | -0.70495300 | -1.13601900 | -2.56070800 |
| C  | -2.46119700 | -3.86669400 | 1.05073500  | C                                                   | -5.17977000 | 0.26998700  | 2.66067000  |
| C  | -2.54143500 | -2.89241400 | 2.03684300  | C                                                   | -5.09276700 | -2.74796000 | 2.80689100  |
| C  | -3.62325700 | 3.41023500  | 0.17580600  | C                                                   | -4.86694800 | -2.89001500 | -0.87163700 |
| C  | -2.76147400 | -3.54745900 | -0.26627700 | C                                                   | -2.97120600 | 2.97927300  | -0.86029700 |
| C  | -4.20579500 | -2.95917600 | -2.85348500 | C                                                   | -1.05285400 | 0.13390100  | -3.32138400 |
| C  | -6.18362500 | -0.60606800 | -0.85973900 | C                                                   | -5.42154700 | -0.89002600 | -2.21619800 |
| C  | -1.43172500 | -0.06447600 | 2.92641500  | C                                                   | -5.27615100 | 2.77148600  | -1.83546500 |
| C  | -3.30665500 | 3.22657800  | 1.65219800  | C                                                   | -2.80595700 | -1.74556800 | 3.08985500  |
| C  | -5.99274700 | -0.23256500 | 1.58122700  | C                                                   | -1.18971600 | -4.23580000 | -1.80702200 |
| C  | -3.44662700 | -0.93273300 | 4.15018800  | H                                                   | -3.65480800 | -2.42498300 | 1.26995400  |
| C  | -2.02822400 | -1.71700000 | -2.72935800 | H                                                   | -1.93615800 | -3.19599800 | -0.08210000 |
| C  | -4.93110300 | 3.56795900  | -2.54793400 | H                                                   | -0.35646900 | -1.90390100 | -3.26668200 |
| H  | -3.92899300 | -0.96783900 | -2.14550800 | H                                                   | -3.06744700 | -1.18200800 | 3.99513700  |
| H  | -4.56226000 | 1.44511200  | -2.53646300 | H                                                   | -5.50206700 | 3.14349200  | 0.89829600  |
| H  | -4.36071500 | 4.21510500  | 0.05256900  | H                                                   | -0.31782600 | -2.72072200 | -0.55161200 |
| H  | -1.43587500 | -2.64190000 | -2.69404400 | H                                                   | -3.21583100 | -2.98572300 | -2.88922800 |
| H  | -2.24727100 | -3.13426400 | 3.05666100  | H                                                   | -5.98395300 | -2.82983900 | 2.17346600  |
| H  | -3.10956100 | 2.42569100  | -2.40375700 | H                                                   | -5.89169600 | -1.55332200 | -2.95039900 |



|    |             |             |             |                                              |             |             |             |
|----|-------------|-------------|-------------|----------------------------------------------|-------------|-------------|-------------|
| H  | 5.45277700  | -0.05005300 | 3.62140300  | H                                            | -8.44507900 | -1.40229600 | 0.59047300  |
| H  | 7.50145600  | 1.32047200  | -0.96859400 | H                                            | -3.49340500 | 1.53260000  | -1.77587900 |
| H  | 6.78251000  | 2.36632500  | 1.06968900  | H                                            | -2.45288400 | -1.95140000 | 2.37860400  |
| H  | 5.29348800  | 2.43796900  | -2.13999700 | H                                            | -5.08520000 | 2.66507600  | -1.31070700 |
| H  | 4.03092600  | 1.50172200  | -3.65322200 | H                                            | -4.23132900 | -0.77359600 | -2.70848300 |
| H  | 4.01766500  | 5.16483300  | -0.45051200 | H                                            | -7.91240200 | -2.88487000 | -0.21809100 |
| H  | 4.66221800  | -0.58921800 | -2.38063400 | H                                            | -2.34630700 | 0.85761700  | 4.91548200  |
| H  | 1.41498000  | -0.28529100 | 2.03733900  | H                                            | -5.66748200 | -2.53167600 | -1.64607200 |
| H  | 6.42990400  | 0.37133400  | -2.00096200 | H                                            | -0.72947600 | 1.06683100  | 3.39457600  |
| H  | 2.49826100  | 0.73543000  | -3.19577000 | H                                            | -1.19766500 | 3.50226300  | -2.25890000 |
| H  | 2.38397000  | 5.17708100  | -1.13481900 | H                                            | -3.05916600 | -1.94405400 | 4.04756300  |
| H  | 4.25918700  | -1.09101200 | 4.41193200  | H                                            | -5.94953600 | 0.81905000  | 2.50919700  |
| H  | 1.66208100  | 2.87536100  | -2.22991700 | H                                            | -1.97668600 | 0.87225800  | -3.58644500 |
| H  | 3.83911000  | -2.78664400 | 3.01325300  | H                                            | -0.57684300 | 0.99167700  | -2.49909400 |
| H  | 5.79340100  | -3.40194200 | -2.81850200 | H                                            | -2.77496100 | 3.95602400  | -1.59185600 |
| H  | 1.72966100  | 0.37842800  | 3.65315900  | H                                            | -4.91931700 | 2.27544500  | 2.43648700  |
| H  | 5.11902700  | 2.27712700  | 1.66243400  | H                                            | -1.83536900 | -0.22950800 | -2.19744800 |
| H  | 3.36348700  | -1.92012400 | -3.97445300 | H                                            | 0.68328500  | 2.24737400  | 1.75667600  |
| H  | 3.23201500  | -3.25371300 | -2.80945600 | H                                            | -3.96471000 | 0.16914900  | 5.08263300  |
| H  | 6.76713700  | -2.00194100 | -2.34142500 | H                                            | -8.06223000 | -2.84119700 | 1.54040100  |
| H  | 6.17068700  | 0.83765000  | 1.71377900  | H                                            | -2.65538500 | 3.28701100  | -3.23153600 |
| H  | 2.44295600  | -1.70090600 | -2.47023200 | H                                            | -5.54291900 | -1.24789200 | -3.79109900 |
| H  | 4.41331100  | -4.58008700 | 1.41622700  | H                                            | -4.42383300 | 3.37302300  | 0.19080200  |
| H  | 4.08588600  | 0.66524600  | 4.49710500  | O                                            | -1.42202000 | -3.01804400 | -0.10643400 |
| H  | 2.62391800  | 5.47443000  | 0.58835700  | H                                            | -1.38586100 | -3.63511200 | -0.84890000 |
| H  | 5.91731500  | -2.01175200 | -3.89967400 | O                                            | 0.17819300  | -1.31779400 | -0.78375600 |
| H  | 2.52524400  | 2.00951200  | -4.41774700 | H                                            | 0.02783700  | -1.59361000 | -1.69679100 |
| H  | 6.94994000  | -0.26552600 | -0.41465200 |                                              |             |             |             |
| B  | -0.17696000 | -2.31690400 | 0.22653900  | <b>INT9</b>                                  |             |             |             |
| H  | -0.25582400 | -1.79595600 | 1.30966000  | $E_{\text{solv}} = -2455.816647$ a.u.        |             |             |             |
| N  | 0.99830400  | -3.42966300 | 0.30373300  | Zero-point energy correction = 1.039098 a.u. |             |             |             |
| H  | 1.22676900  | -3.87503300 | -0.58824600 | Cu                                           | -1.10141300 | -0.33004900 | -0.48433400 |
| H  | 1.87254900  | -3.02894000 | 0.66107400  | N                                            | -3.68956200 | 0.77573900  | -0.06699700 |
| H  | 0.74322600  | -4.17607900 | 0.95269800  | C                                            | -4.55862000 | -1.31247100 | -1.03651000 |
| Cu | -2.94675300 | -1.85647200 | -0.13285300 | C                                            | -4.16880200 | -0.58044500 | 0.10009400  |
| N  | -4.16835300 | 0.59825500  | 0.36776900  | C                                            | -2.22649300 | 2.50325500  | -0.48726200 |
| C  | -2.38663900 | 0.79974800  | 2.05631500  | C                                            | -4.32717900 | -0.82347100 | -2.45185600 |
| C  | -2.84725800 | 1.05378500  | 0.75019500  | C                                            | -4.16593600 | -1.14584300 | 1.38750300  |
| C  | -5.82593000 | -0.85505100 | -0.30786900 | C                                            | -3.59862100 | 3.13802800  | -0.16921200 |
| C  | -3.15875700 | -0.00461900 | 3.08310700  | C                                            | -1.83221000 | 2.68170300  | -1.97092500 |
| C  | -2.03733800 | 1.66606000  | -0.22265300 | C                                            | -2.43177800 | 1.03006600  | -0.29610200 |
| C  | -6.45831200 | 0.54852400  | -0.18941300 | C                                            | -4.61339600 | 1.99066000  | -0.01844800 |
| C  | -6.31269800 | -1.81466000 | 0.80362000  | C                                            | -3.55693900 | -0.45762000 | 2.59176300  |
| C  | -4.36481400 | -0.62567900 | -0.04348500 | C                                            | -5.13918300 | -3.15461500 | 0.43114100  |
| C  | -5.42177600 | 1.46180500  | 0.48213100  | C                                            | -4.66404600 | -2.44514800 | 1.52768700  |
| C  | -2.43451900 | 1.79847200  | -1.67924400 | C                                            | -1.09884600 | 2.98687800  | 0.43479000  |
| C  | -0.30854900 | 1.90237600  | 1.46594400  | C                                            | -5.06460400 | -2.59808200 | -0.83792900 |
| C  | -0.76718300 | 2.09348700  | 0.16917600  | C                                            | -5.54964300 | -0.98047000 | -3.35072700 |
| C  | -6.02257900 | -1.49042600 | -1.69276400 | C                                            | -5.61565600 | 1.94116300  | -1.16201800 |
| C  | -1.10913000 | 1.24891200  | 2.39102800  | C                                            | -2.21229000 | -1.10087000 | 2.93467600  |
| C  | -3.31189100 | 0.73635200  | 4.40943900  | C                                            | -1.29433900 | 2.66118800  | 1.90612300  |
| C  | -5.73701100 | 1.73413900  | 1.94644200  | C                                            | -5.36613900 | 2.03817800  | 1.30068500  |
| C  | -1.65979400 | 0.79986700  | -2.53921700 | C                                            | -4.47851600 | -0.45682600 | 3.80760600  |
| C  | -5.32282500 | -0.76652000 | -2.83324400 | C                                            | -3.11833300 | -1.54279300 | -3.05509100 |
| C  | -5.24854400 | 2.78904500  | -0.23546500 | C                                            | -1.40284700 | 4.09098600  | -2.34448100 |
| C  | -2.25652900 | 3.21714200  | -2.21319600 | H                                            | -4.07504600 | 0.24165200  | -2.41589000 |
| C  | -2.49573200 | -1.36420300 | 3.30706400  | H                                            | -2.68460900 | 2.37374800  | -2.59660600 |
| C  | -7.76095200 | -2.25632600 | 0.66587500  | H                                            | -0.99473500 | 4.07407900  | 0.31091300  |
| H  | -4.16262600 | -0.20042900 | 2.69128600  | H                                            | -3.29374100 | -2.62443400 | -3.12339500 |
| H  | -6.16947200 | -1.32505100 | 1.77919700  | H                                            | -4.68329900 | -2.90455500 | 2.51447900  |
| H  | -7.10144300 | -1.53944300 | -1.89380900 | H                                            | -1.01708800 | 1.97780000  | -2.20177300 |
| H  | -1.46610800 | -1.25168100 | 3.67306200  | H                                            | -3.91457500 | 3.82497800  | -0.96313900 |
| H  | -0.13005400 | 2.58790300  | -0.56370200 | H                                            | -6.43730400 | -0.50226500 | -2.92103300 |
| H  | -5.65723800 | -2.69914600 | 0.81012000  | H                                            | -6.01844200 | 2.91808400  | 1.29579600  |
| H  | -7.38840700 | 0.53051600  | 0.38997500  | H                                            | -6.27586100 | 2.81128600  | -1.08008200 |
| H  | -3.74531300 | 1.73403300  | 4.27605800  | H                                            | -3.55663100 | 3.72624900  | 0.75472900  |
| H  | -6.16728700 | 3.37170300  | -0.10796200 | H                                            | -2.23063800 | 3.07236700  | 2.30483800  |
| H  | -6.62966800 | 2.36678100  | 1.99601000  | H                                            | -2.15391000 | 4.83804600  | -2.05868400 |
| H  | -6.71268600 | 0.94176000  | -1.18084300 | H                                            | -3.34992000 | 0.58575400  | 2.32803500  |
| H  | -5.64044600 | 0.28070500  | -2.91914900 | H                                            | -2.21381500 | -1.39093500 | -2.44557600 |
|    |             |             |             | H                                            | -4.69334900 | 2.13139600  | 2.15982200  |

|    |             |             |             |                                              |             |             |             |
|----|-------------|-------------|-------------|----------------------------------------------|-------------|-------------|-------------|
| H  | -1.30028900 | 1.57692200  | 2.08550300  | H                                            | 2.71500800  | 2.11677400  | 4.59401100  |
| H  | -0.45787200 | 4.36733400  | -1.86078100 | H                                            | 1.86387500  | 1.26068400  | -3.74737500 |
| H  | -5.79016800 | -2.03583900 | -3.52776800 | H                                            | 5.71493700  | 0.48723200  | -1.84224900 |
| H  | -0.14988800 | 2.54667600  | 0.08312600  | H                                            | 1.33624500  | -0.53080000 | 3.80681900  |
| H  | -5.37878000 | -3.18441700 | -1.69893200 | H                                            | 0.69067600  | 1.07649900  | 3.41241600  |
| H  | -4.63678800 | -1.46984500 | 4.19686800  | H                                            | 4.35519000  | 1.73987200  | 4.03695000  |
| H  | -2.91319100 | -1.16491900 | -4.06378800 | H                                            | 5.76674400  | 1.92579300  | -0.78563800 |
| H  | -5.13180900 | 1.98646300  | -2.14364100 | H                                            | 0.93023200  | -0.11667500 | 2.12235100  |
| H  | -1.74936500 | -0.59272100 | 3.78958800  | H                                            | 1.73934300  | 4.99425300  | 1.11510700  |
| H  | -2.33595100 | -2.15949400 | 3.20095900  | H                                            | 4.06362200  | 2.53120200  | -3.95162000 |
| H  | -5.46033200 | -0.03034800 | 3.57292900  | H                                            | 4.91513600  | -3.63478500 | -3.33797300 |
| H  | -6.24254100 | 1.04302100  | -1.10942600 | H                                            | 3.40245400  | 0.52219600  | 4.90881900  |
| H  | -1.51056600 | -1.04040500 | 2.08694500  | H                                            | 3.16561800  | -3.87511500 | 2.50354800  |
| H  | -5.53680100 | -4.15771600 | 0.56370000  | H                                            | 5.66820300  | 1.65023000  | 1.74097200  |
| H  | -5.35641000 | -0.52318800 | -4.32771400 | O                                            | 0.22651500  | -3.94588000 | 0.91263500  |
| H  | -1.25293100 | 4.16844700  | -3.42616300 | H                                            | -0.07296800 | -3.72964500 | 1.80305700  |
| H  | -4.03292800 | 0.13640800  | 4.61411200  | O                                            | -1.99965400 | -3.69070200 | -0.11198300 |
| H  | -0.47769200 | 3.08276600  | 2.50241000  | H                                            | -2.46567400 | -3.40686700 | 0.68686800  |
| H  | -6.00098500 | 1.15399800  | 1.43521600  |                                              |             |             |             |
| B  | -0.68829700 | -3.92584500 | -0.06227800 |                                              |             |             |             |
| H  | -0.15555100 | -1.56647000 | -0.76928600 |                                              |             |             |             |
| N  | -0.10263200 | -4.29240800 | -1.45175100 |                                              |             |             |             |
| H  | -0.75262400 | -4.85952500 | -2.00151900 |                                              |             |             |             |
| H  | 0.07436600  | -3.44074700 | -1.99582200 |                                              |             |             |             |
| H  | 0.78428700  | -4.79600400 | -1.38341000 |                                              |             |             |             |
| Cu | 1.29010000  | -1.04590100 | -0.36869500 |                                              |             |             |             |
| N  | 3.82512100  | 0.21322900  | 0.19604900  |                                              |             |             |             |
| C  | 2.94856000  | 2.34888600  | -0.66104600 |                                              |             |             |             |
| C  | 3.17370200  | 1.48475000  | 0.42470600  |                                              |             |             |             |
| C  | 4.13594600  | -2.01071600 | -0.31813900 |                                              |             |             |             |
| C  | 3.12564800  | 1.91977200  | -2.10315900 |                                              |             |             |             |
| C  | 2.78465300  | 1.81157100  | 1.73577800  |                                              |             |             |             |
| C  | 5.50636500  | -1.44653900 | 0.11291700  |                                              |             |             |             |
| C  | 4.07948400  | -2.33592700 | -1.82910200 |                                              |             |             |             |
| C  | 3.17410200  | -0.87348400 | -0.10627200 |                                              |             |             |             |
| C  | 5.34500800  | 0.07258600  | 0.27460400  |                                              |             |             |             |
| C  | 2.77895000  | 0.79471300  | 2.85859700  |                                              |             |             |             |
| C  | 2.13094900  | 3.99870600  | 0.91819300  |                                              |             |             |             |
| C  | 2.27924900  | 3.09291900  | 1.96004300  |                                              |             |             |             |
| C  | 3.70030400  | -3.23104500 | 0.50786600  |                                              |             |             |             |
| C  | 2.43167100  | 3.61584700  | -0.38164500 |                                              |             |             |             |
| C  | 3.88436300  | 2.93690300  | -2.94949200 |                                              |             |             |             |
| C  | 6.00183300  | 0.85697400  | -0.85186700 |                                              |             |             |             |
| C  | 1.35418400  | 0.27495800  | 3.06193300  |                                              |             |             |             |
| C  | 3.43920100  | -2.95350900 | 1.97992400  |                                              |             |             |             |
| C  | 5.87152600  | 0.58122200  | 1.60593400  |                                              |             |             |             |
| C  | 3.34782600  | 1.32846700  | 4.16851500  |                                              |             |             |             |
| C  | 1.75666100  | 1.62574800  | -2.71901700 |                                              |             |             |             |
| C  | 4.90794100  | -3.53989800 | -2.24775000 |                                              |             |             |             |
| H  | 3.69109600  | 0.98121400  | -2.12095500 |                                              |             |             |             |
| H  | 4.40716500  | -1.44860600 | -2.39274500 |                                              |             |             |             |
| H  | 4.47546300  | -4.00319900 | 0.40951900  |                                              |             |             |             |
| H  | 1.13577000  | 2.53227700  | -2.74296700 |                                              |             |             |             |
| H  | 1.98493700  | 3.38042600  | 2.96795900  |                                              |             |             |             |
| H  | 3.02607100  | -2.49980300 | -2.10979200 |                                              |             |             |             |
| H  | 6.28887700  | -1.67317400 | -0.62057500 |                                              |             |             |             |
| H  | 4.85418700  | 3.19427500  | -2.50839800 |                                              |             |             |             |
| H  | 6.95831000  | 0.44436200  | 1.62049400  |                                              |             |             |             |
| H  | 7.08812800  | 0.75005800  | -0.76055600 |                                              |             |             |             |
| H  | 5.82779000  | -1.89147300 | 1.06222800  |                                              |             |             |             |
| H  | 4.32010600  | -2.54181600 | 2.48949600  |                                              |             |             |             |
| H  | 5.95057600  | -3.45373900 | -1.91807600 |                                              |             |             |             |
| H  | 3.38922500  | -0.06405400 | 2.55494100  |                                              |             |             |             |
| H  | 1.21203400  | 0.86175200  | -2.14095800 |                                              |             |             |             |
| H  | 5.45773900  | 0.02747200  | 2.45536700  |                                              |             |             |             |
| H  | 2.61221000  | -2.24350000 | 2.11877700  |                                              |             |             |             |
| H  | 4.50458900  | -4.47256900 | -1.83879100 |                                              |             |             |             |
| H  | 3.31472800  | 3.86614000  | -3.07260400 |                                              |             |             |             |
| H  | 2.78645800  | -3.64643200 | 0.05512000  |                                              |             |             |             |
| H  | 2.25095300  | 4.31004200  | -1.20074200 |                                              |             |             |             |
|    |             |             |             | <b>TS10</b>                                  |             |             |             |
|    |             |             |             | $E_{\text{solv}} = -2532.253882$ a.u.        |             |             |             |
|    |             |             |             | Zero-point energy correction = 1.062268 a.u. |             |             |             |
|    |             |             |             | Cu                                           | 1.02001200  | 0.04621200  | -0.62771000 |
|    |             |             |             | N                                            | 3.54869600  | -1.14592300 | 0.01438300  |
|    |             |             |             | C                                            | 4.60374700  | 0.81081000  | -1.03920300 |
|    |             |             |             | C                                            | 4.11739100  | 0.18085900  | 0.12022100  |
|    |             |             |             | C                                            | 1.99820000  | -2.80796900 | -0.35688200 |
|    |             |             |             | C                                            | 4.38513700  | 0.25850100  | -2.43325300 |
|    |             |             |             | C                                            | 4.12240400  | 0.82002600  | 1.37376200  |
|    |             |             |             | C                                            | 3.32895900  | -3.50451600 | 0.00634700  |
|    |             |             |             | C                                            | 1.59277400  | -3.06036800 | -1.82604100 |
|    |             |             |             | C                                            | 2.28729000  | -1.33854700 | -0.25348200 |
|    |             |             |             | C                                            | 4.39469900  | -2.40758500 | 0.17779300  |
|    |             |             |             | C                                            | 3.41168200  | 0.26055000  | 2.58894700  |
|    |             |             |             | C                                            | 5.29441700  | 2.68051900  | 0.34424600  |
|    |             |             |             | C                                            | 4.72694700  | 2.07757600  | 1.46062600  |
|    |             |             |             | C                                            | 0.84462600  | -3.16638700 | 0.59114000  |
|    |             |             |             | C                                            | 5.21044600  | 2.06027800  | -0.89323200 |
|    |             |             |             | C                                            | 5.64714400  | 0.27487600  | -3.29047900 |
|    |             |             |             | C                                            | 5.47156400  | -2.46686100 | -0.89483100 |
|    |             |             |             | C                                            | 2.11211700  | 1.03142700  | 2.83079500  |
|    |             |             |             | C                                            | 1.06301700  | -2.76240400 | 2.03932100  |
|    |             |             |             | C                                            | 5.05501700  | -2.43638000 | 1.54642100  |
|    |             |             |             | C                                            | 4.27542500  | 0.26384100  | 3.84621000  |
|    |             |             |             | C                                            | 3.25560800  | 1.02762100  | -3.12283600 |
|    |             |             |             | C                                            | 1.11196900  | -4.47317500 | -2.11433300 |
|    |             |             |             | H                                            | 4.05347700  | -0.78219100 | -2.34885100 |
|    |             |             |             | H                                            | 2.45408100  | -2.82149800 | -2.46982200 |
|    |             |             |             | H                                            | 0.67878400  | -4.25147800 | 0.53497900  |
|    |             |             |             | H                                            | 3.49772800  | 2.09510400  | -3.20909800 |
|    |             |             |             | H                                            | 4.75340000  | 2.59049400  | 2.42037500  |
|    |             |             |             | H                                            | 0.80266100  | -2.34267800 | -2.09793200 |
|    |             |             |             | H                                            | 3.63304700  | -4.20841500 | -0.77740200 |
|    |             |             |             | H                                            | 6.48428000  | -0.23125000 | -2.79622800 |
|    |             |             |             | H                                            | 5.65538200  | -3.34951400 | 1.62125800  |
|    |             |             |             | H                                            | 6.06833900  | -3.37122500 | -0.73438200 |
|    |             |             |             | H                                            | 3.23419800  | -4.08787500 | 0.92941100  |
|    |             |             |             | H                                            | 1.97903800  | -3.19686400 | 2.46030200  |
|    |             |             |             | H                                            | 1.83869100  | -5.22844500 | -1.78984400 |
|    |             |             |             | H                                            | 3.12993800  | -0.77677600 | 2.37851200  |
|    |             |             |             | H                                            | 2.31072200  | 0.94622800  | -2.56349900 |
|    |             |             |             | H                                            | 4.32333700  | -2.45539700 | 2.36131000  |
|    |             |             |             | H                                            | 1.12619900  | -1.67095900 | 2.14906700  |
|    |             |             |             | H                                            | 0.16170700  | -4.68800000 | -1.61022700 |
|    |             |             |             | H                                            | 5.96479700  | 1.29797800  | -3.52551000 |
|    |             |             |             | H                                            | -0.07864500 | -2.69565100 | 0.21236400  |
|    |             |             |             | H                                            | 5.60082500  | 2.56708200  | -1.77320800 |
|    |             |             |             | H                                            | 4.49804200  | 1.28351100  | 4.18318800  |
|    |             |             |             | H                                            | 3.08511400  | 0.63185000  | -4.13109400 |
|    |             |             |             | H                                            | 5.05099700  | -2.52474400 | -1.90447100 |

|    |             |             |             |                                               |             |             |             |
|----|-------------|-------------|-------------|-----------------------------------------------|-------------|-------------|-------------|
| H  | 1.55663800  | 0.60032400  | 3.67271100  | H                                             | -2.06226500 | -4.93103900 | 1.51104800  |
| H  | 2.31937300  | 2.08270800  | 3.07606400  | H                                             | -4.34417300 | -2.88115100 | -3.75402100 |
| H  | 5.22869500  | -0.25191100 | 3.68539200  | H                                             | -4.86519900 | 3.43065600  | -3.71427800 |
| H  | 6.14943600  | -1.60711200 | -0.83410500 | H                                             | -3.39384300 | -0.01989400 | 4.85142000  |
| H  | 1.45491000  | 0.99474100  | 1.94638000  | H                                             | -3.12543100 | 4.04332700  | 2.10806400  |
| H  | 5.77184200  | 3.65283200  | 0.43553300  | H                                             | -5.78036200 | -1.34768000 | 1.84870900  |
| H  | 5.45753700  | -0.23250300 | -4.24308900 | O                                             | 1.33183400  | 5.87793100  | 0.22149700  |
| H  | 0.95122300  | -4.60823900 | -3.18879900 | H                                             | 0.82573800  | 6.26282900  | 0.94591000  |
| H  | 3.74823700  | -0.24164500 | 4.66317100  | H                                             | 2.25690800  | 5.98051400  | 0.47231200  |
| H  | 0.22912200  | -3.10202100 | 2.66298200  | O                                             | -0.08514500 | 3.47469400  | 0.82532100  |
| H  | 5.72954500  | -1.58328700 | 1.68759200  | H                                             | 0.20252200  | 3.12957300  | 1.67714500  |
| B  | 0.86727900  | 3.62878300  | -0.11602900 | O                                             | 2.14423900  | 3.22265400  | -0.20856800 |
| H  | 0.11872100  | 1.24169600  | -1.14664700 | H                                             | 2.58533100  | 2.85609300  | 0.56956200  |
| N  | 0.30963000  | 4.10092200  | -1.48862300 | <b>TS11</b>                                   |             |             |             |
| H  | 0.65243900  | 5.05188400  | -1.65680000 | $E_{\text{solv}} = -2615.470962 \text{ a.u.}$ |             |             |             |
| H  | 0.62723400  | 3.50237400  | -2.25388600 | Zero-point energy correction = 1.128644 a.u.  |             |             |             |
| H  | -0.71033900 | 4.13354700  | -1.51226100 | Cu                                            | -1.26739800 | 0.17872300  | 0.69169400  |
| Cu | -1.33374400 | 0.89640000  | -0.59790200 | N                                             | -3.57436100 | -0.86296600 | -0.52592300 |
| N  | -3.91697700 | -0.16623100 | 0.13048600  | C                                             | -4.52826400 | -0.64566300 | 1.73643100  |
| C  | -3.15822200 | -2.41985100 | -0.51601700 | C                                             | -4.27186300 | -0.08306500 | 0.47497800  |
| C  | -3.32265900 | -1.43898700 | 0.47747600  | C                                             | -1.83343200 | -1.76856600 | -1.72090800 |
| C  | -4.13873400 | 2.01331100  | -0.57959500 | C                                             | -4.04212300 | -2.02152200 | 2.14396400  |
| C  | -3.33898500 | -2.13364200 | -1.99279300 | C                                             | -4.58988200 | 1.25302700  | 0.16972200  |
| C  | -2.93120700 | -1.65079400 | 1.81170400  | C                                             | -3.13306400 | -2.01691100 | -2.51221200 |
| C  | -5.53305300 | 1.54396700  | -0.11105300 | C                                             | -1.27568800 | -3.03282600 | -1.01627200 |
| C  | -4.07800100 | 2.21755600  | -2.11071600 | C                                             | -2.26792900 | -0.85604000 | -0.60071100 |
| C  | -3.22151400 | 0.85758000  | -0.27766300 | C                                             | -4.29245800 | -1.73027000 | -1.55629000 |
| C  | -5.42813700 | 0.04577100  | 0.21109900  | C                                             | -4.16287400 | 1.93230600  | -1.11630700 |
| C  | -2.85383900 | -0.52514400 | 2.82271800  | C                                             | -5.54743100 | 1.45762500  | 2.38771600  |
| C  | -2.40463000 | -3.94136800 | 1.21654800  | C                                             | -5.24126900 | 2.00405000  | 1.14857900  |
| C  | -2.49201500 | -2.92786400 | 2.16177600  | C                                             | -0.72147900 | -1.12733700 | -2.56302100 |
| C  | -3.65801300 | 3.27365700  | 0.15647000  | C                                             | -5.18021100 | 0.15149700  | 2.67937000  |
| C  | -2.70145900 | -3.67688500 | -0.11306500 | C                                             | -5.14089800 | -2.86972700 | 2.77790400  |
| C  | -4.16981600 | -3.18837100 | -2.71660400 | C                                             | -4.84639200 | -2.99534400 | -0.91219400 |
| C  | -6.13412100 | -0.82364300 | -0.81902000 | C                                             | -3.00273600 | 2.89008500  | -0.84647800 |
| C  | -1.40884300 | -0.02895500 | 2.91442700  | C                                             | -1.08572200 | 0.18080700  | -3.24748900 |
| C  | -3.42840900 | 3.09713500  | 1.64875100  | C                                             | -5.43487500 | -0.97754600 | -2.21495900 |
| C  | -5.95442500 | -0.29524100 | 1.59525500  | C                                             | -5.30939000 | 2.65932900  | -1.81255700 |
| C  | -3.37883500 | -0.90336000 | 4.20311800  | C                                             | -2.83635600 | -1.91179000 | 3.07700900  |
| C  | -1.96851000 | -1.98426200 | -2.65511600 | C                                             | -1.13832900 | -4.26100300 | -1.90058300 |
| C  | -4.85292200 | 3.42230700  | -2.61999400 | H                                             | -3.69710300 | -2.54480600 | 1.24732800  |
| H  | -3.85068500 | -1.17063100 | -2.10119300 | H                                             | -1.89645800 | -3.28683600 | -0.14226400 |
| H  | -4.45394200 | 1.30432300  | -2.59780500 | H                                             | -0.38173600 | -1.85551700 | -3.31423100 |
| H  | -4.39590500 | 4.06938700  | -0.01364400 | H                                             | -3.08744100 | -1.36133000 | 3.99320300  |
| H  | -1.39846000 | -2.92148800 | -2.58982200 | H                                             | -5.49855400 | 3.04103000  | 0.94112900  |
| H  | -2.20062700 | -3.12694200 | 3.19148100  | H                                             | -0.29157500 | -2.76384600 | -0.60618600 |
| H  | -3.02169300 | 2.30522300  | -2.41176900 | H                                             | -3.19766600 | -3.02720600 | -2.92799300 |
| H  | -6.29587100 | 1.71703600  | -0.87904600 | H                                             | -6.03212800 | -2.92634200 | 2.14161200  |
| H  | -5.14447400 | -3.34097800 | -2.23897400 | H                                             | -5.90027200 | -1.63668900 | -2.95590000 |
| H  | -7.03657700 | -0.12536200 | 1.60303800  | H                                             | -5.34540600 | -3.58373200 | -1.69007300 |
| H  | -7.21330300 | -0.65843800 | -0.73015500 | H                                             | -3.19175900 | -1.32489100 | -3.36002000 |
| H  | -5.85428400 | 2.09797600  | 0.77884000  | H                                             | -1.84930400 | 0.05492200  | -4.02271400 |
| H  | -4.33222300 | 2.75788000  | 2.17137300  | H                                             | -2.11055600 | -4.68464900 | -2.17681700 |
| H  | -5.89557300 | 3.41239100  | -2.27923800 | H                                             | -3.78398200 | 1.16808000  | -1.80636300 |
| H  | -3.45540300 | 0.31521300  | 2.45749500  | H                                             | -2.00210600 | -1.38574700 | 2.59030000  |
| H  | -1.37363900 | -1.19395900 | -2.17057200 | H                                             | -5.09309700 | -0.08090200 | -2.74111100 |
| H  | -5.51595300 | 0.33849300  | 2.37348600  | H                                             | -1.46270500 | 0.92465300  | -2.53049400 |
| H  | -2.63139400 | 2.36908600  | 1.84968100  | H                                             | -0.59100900 | -4.04259800 | -2.82574300 |
| H  | -4.40301700 | 4.36456800  | -2.28900100 | H                                             | -5.45150900 | -2.46827000 | 3.75035800  |
| H  | -3.65582900 | -4.15687400 | -2.74672500 | H                                             | 0.14303600  | -0.96321200 | -1.89540200 |
| H  | -2.72052700 | 3.61433400  | -0.31001600 | H                                             | -5.38922000 | -0.25685600 | 3.66634200  |
| H  | -2.56541700 | -4.45847400 | -0.85877500 | H                                             | -5.66660200 | 3.50997600  | -1.21949700 |
| H  | -2.74092400 | -1.65094600 | 4.69019700  | H                                             | -2.48336000 | -2.91045600 | 3.36268000  |
| H  | -2.07631600 | -1.72640800 | -3.71538400 | H                                             | -4.06574000 | -3.62579300 | -0.47355800 |
| H  | -5.84427900 | -0.57241800 | -1.84523300 | H                                             | -2.63634700 | 3.31093600  | -1.79335600 |
| H  | -1.33629600 | 0.84137800  | 3.57996100  | H                                             | -3.30798700 | 3.71857100  | -0.19326500 |
| H  | -0.75110000 | -0.81543700 | 3.30827800  | H                                             | -6.16252100 | 1.99521300  | -1.99230900 |
| H  | -4.39603800 | -1.30884900 | 4.15525600  | H                                             | -5.59326700 | -2.76319700 | -0.14444100 |
| H  | -5.94519500 | -1.88916000 | -0.64303200 | H                                             | -2.15825600 | 2.38301900  | -0.35951700 |
| H  | -1.01953600 | 0.26450000  | 1.92495400  | H                                             | -6.05743100 | 2.05918300  | 3.13620800  |

|    |             |             |             |                                              |             |             |             |
|----|-------------|-------------|-------------|----------------------------------------------|-------------|-------------|-------------|
| H  | -4.77747500 | -3.88970000 | 2.94746300  | H                                            | -0.99641100 | 3.38856900  | 3.07220300  |
| H  | -0.58642000 | -5.04411200 | -1.36903800 | H                                            | 0.54354400  | 2.87140200  | 3.01457100  |
| H  | -4.97321200 | 3.05370200  | -2.77845600 | H                                            | -0.26143600 | 3.21173700  | 1.60975300  |
| H  | -0.20655600 | 0.61356700  | -3.73900800 | B                                            | 0.28320400  | 4.59337300  | -1.18581700 |
| H  | -6.20636600 | -0.69604200 | -1.48820200 | N                                            | 1.67717400  | 5.46636300  | -1.08360900 |
| H  | -0.02005000 | 1.43526900  | -0.70491000 | H                                            | 1.50763600  | 6.39441600  | -0.69733700 |
| Cu | 1.30037700  | 0.81574700  | -0.03143500 | H                                            | 2.36049500  | 5.00425400  | -0.48455900 |
| N  | 3.73024200  | -0.70005300 | 0.39647200  | H                                            | 2.11053400  | 5.59781900  | -1.99761100 |
| C  | 2.56930700  | -2.86421000 | 0.31056700  | O                                            | 0.74820200  | 3.28342300  | -1.74283300 |
| C  | 3.20082100  | -1.80742000 | -0.37097700 | H                                            | 0.38300500  | 2.21955700  | -1.11897000 |
| C  | 3.81784600  | 1.29433100  | 1.54039300  | H                                            | 0.54797200  | 3.21840400  | -2.68607500 |
| C  | 2.24623700  | -2.81883700 | 1.79106900  | O                                            | -0.52378700 | 5.34105000  | -2.06329800 |
| C  | 3.30836600  | -1.77581300 | -1.77284600 | H                                            | -1.45615600 | 5.14147000  | -1.94583100 |
| C  | 5.23831000  | 0.69363200  | 1.57608800  | O                                            | -0.19440100 | 4.33392000  | 0.13539600  |
| C  | 3.13260700  | 1.20184500  | 2.92481300  | H                                            | -0.68226400 | 5.09344800  | 0.46971700  |
| C  | 3.03226400  | 0.37111200  | 0.64801100  | <b>INT2-a</b>                                |             |             |             |
| C  | 5.15665100  | -0.70763100 | 0.95014100  | E <sub>solv</sub> = -2305.255812 a.u.        |             |             |             |
| C  | 3.81715300  | -0.57145300 | -2.54008400 | Zero-point energy correction = 1.031043 a.u. |             |             |             |
| C  | 2.29195300  | -3.97725600 | -1.82686800 | Cu                                           | 1.85385800  | 1.61757500  | 0.21965100  |
| C  | 2.84307700  | -2.88523300 | -2.48169800 | N                                            | 3.95766900  | -0.35699000 | 0.05518600  |
| C  | 3.79173100  | 2.73067900  | 0.99743600  | C                                            | 2.29754000  | -2.09544900 | 0.59500900  |
| C  | 2.13901200  | -3.95417600 | -0.44724900 | C                                            | 3.06253200  | -1.41077900 | -0.36623400 |
| C  | 2.68079100  | -4.07396100 | 2.54201900  | C                                            | 4.79308800  | 1.68817200  | 0.71852300  |
| C  | 5.34872500  | -1.81997000 | 1.96883000  | C                                            | 2.07275600  | -1.56051600 | 1.99445200  |
| C  | 2.65307100  | 0.14536800  | -3.22425300 | C                                            | 3.02681600  | -1.74655800 | -1.73095200 |
| C  | 4.20015300  | 2.85590600  | -0.46392300 | C                                            | 5.98814800  | 0.72267100  | 0.58534800  |
| C  | 6.15607600  | -0.89984600 | -0.17894100 | C                                            | 4.51892700  | 2.08162100  | 2.18867600  |
| C  | 4.89785400  | -0.92661000 | -3.55711900 | C                                            | 3.60757500  | 0.88133000  | 0.25366500  |
| C  | 0.75167500  | -2.57191100 | 2.00047800  | C                                            | 5.41073700  | -0.68608400 | 0.40607700  |
| C  | 3.63538300  | 2.20480200  | 3.94979600  | C                                            | 3.60843100  | -0.84247000 | -2.79808000 |
| H  | 2.76772000  | -1.96285100 | 2.23259800  | C                                            | 1.66289700  | -3.66095700 | -1.14602600 |
| H  | 3.26802300  | 0.17975200  | 3.30965000  | C                                            | 2.31959400  | -2.89246600 | -2.09759500 |
| H  | 4.45627800  | 3.34289600  | 1.62158900  | C                                            | 4.93916800  | 2.94647700  | -0.15393000 |
| H  | 0.15339100  | -3.43520600 | 1.67774500  | C                                            | 1.62019200  | -3.24204700 | 0.17698800  |
| H  | 2.91049400  | -2.88914800 | -3.56804200 | C                                            | 2.14433200  | -2.62470300 | 3.08363600  |
| H  | 2.04517200  | 1.31198900  | 2.78996200  | C                                            | 5.43475400  | -1.50710700 | 1.68865600  |
| H  | 5.62435700  | 0.63732700  | 2.60058300  | C                                            | 2.49081700  | 0.02789700  | -3.37808800 |
| H  | 3.74395700  | -4.29589600 | 2.39760300  | C                                            | 4.91841900  | 2.69257200  | -1.65406800 |
| H  | 7.16495100  | -0.87819800 | 0.24714300  | C                                            | 6.10119500  | -1.46556200 | -0.69830200 |
| H  | 6.38962200  | -1.79509900 | 2.30880700  | C                                            | 4.33486700  | -1.59210600 | -3.90902900 |
| H  | 5.94202400  | 1.31587000  | 1.01126500  | C                                            | 0.71611700  | -0.84787400 | 2.04048000  |
| H  | 5.16488700  | 2.37321400  | -0.66520100 | C                                            | 5.57093800  | 2.98977500  | 2.80550800  |
| H  | 4.72553600  | 2.15871000  | 4.06226300  | H                                            | 2.84220200  | -0.80932900 | 2.21144500  |
| H  | 4.24960200  | 0.14023100  | -1.82672700 | H                                            | 4.42899500  | 1.16436300  | 2.79001500  |
| H  | 0.40584200  | -1.69739800 | 1.42971000  | H                                            | 5.88022700  | 3.44101500  | 0.12299100  |
| H  | 6.09645000  | -0.10228900 | -0.92713700 | H                                            | -0.11100000 | -1.56107800 | 1.91872500  |
| H  | 3.45468100  | 2.40759100  | -1.13541200 | H                                            | 2.27512600  | -3.18177900 | -3.14567900 |
| H  | 3.37297200  | 3.23360000  | 3.67779800  | H                                            | 3.53606500  | 2.57514200  | 2.24307100  |
| H  | 2.10924000  | -4.95213700 | 2.21789600  | H                                            | 6.64779000  | 0.76092900  | 1.45975300  |
| H  | 2.77613000  | 3.14037900  | 1.13497500  | H                                            | 3.08711800  | -3.18257200 | 3.04846100  |
| H  | 1.65526300  | -4.79160700 | 0.05363100  | H                                            | 7.13444100  | -1.65362800 | -0.38647500 |
| H  | 4.50103400  | -1.55500400 | -4.36364500 | H                                            | 6.47657000  | -1.73438800 | 1.93881000  |
| H  | 0.53822200  | -2.38925800 | 3.06177400  | H                                            | 6.60200300  | 0.98557900  | -0.28461200 |
| H  | 4.71198800  | -1.70111000 | 2.85145300  | H                                            | 5.70084200  | 1.98881000  | -1.96696500 |
| H  | 3.00012100  | 1.06108300  | -3.71925900 | H                                            | 6.57946100  | 2.56775800  | 2.71847600  |
| H  | 2.18206500  | -0.49485500 | -3.98204700 | H                                            | 4.32794300  | -0.16256700 | -2.32502100 |
| H  | 5.73362600  | -1.46375000 | -3.09484500 | H                                            | 0.62182000  | -0.11228900 | 1.22461200  |
| H  | 5.16983400  | -2.80555800 | 1.52419500  | H                                            | 6.13748700  | -0.90733900 | -1.63962000 |
| H  | 1.87682500  | 0.42452700  | -2.49588200 | H                                            | 3.95343300  | 2.28466400  | -1.98500800 |
| H  | 1.95310600  | -4.83927400 | -2.39685900 | H                                            | 5.58097900  | 3.97906500  | 2.33585800  |
| H  | 2.50251500  | -3.94832700 | 3.61615800  | H                                            | 1.32095700  | -3.34523800 | 3.00038300  |
| H  | 3.19357100  | 1.99914300  | 4.92951800  | H                                            | 4.13246300  | 3.64873600  | 0.11095800  |
| H  | 5.29259000  | -0.01422300 | -4.01879200 | H                                            | 1.03493300  | -3.80619200 | 0.90006700  |
| H  | 4.32161100  | 3.90507900  | -0.75573300 | H                                            | 3.64229800  | -2.18836200 | -4.51545800 |
| H  | 6.02412200  | -1.86903300 | -0.67452100 | H                                            | 0.58116400  | -0.32123100 | 2.99372900  |
| B  | -0.90990300 | 1.29177400  | 2.55655800  | H                                            | 4.99754400  | -0.97002200 | 2.53752500  |
| H  | -0.07549300 | 0.58612300  | 1.92131300  | H                                            | 2.89420100  | 0.72774300  | -4.12020700 |
| H  | -0.94270700 | 0.85645200  | 3.67805100  | H                                            | 1.73195000  | -0.59378800 | -3.87192600 |
| H  | -2.03350400 | 1.30924900  | 2.05123900  | H                                            | 5.10210800  | -2.26732800 | -3.51302800 |
| N  | -0.36052800 | 2.78683200  | 2.54905700  | H                                            | 4.90727200  | -2.46003900 | 1.56134800  |

|    |             |             |             |
|----|-------------|-------------|-------------|
| H  | 1.98539300  | 0.61132900  | -2.59428900 |
| H  | 1.14419000  | -4.56993400 | -1.44526400 |
| H  | 2.06290800  | -2.15508600 | 4.07024400  |
| H  | 5.36691700  | 3.13394600  | 3.87093800  |
| H  | 4.82242400  | -0.87921300 | -4.58347800 |
| H  | 5.08482000  | 3.62256900  | -2.20636900 |
| H  | 5.62393600  | -2.43682000 | -0.87324000 |
| B  | 0.02536600  | 2.75769300  | 0.46826400  |
| H  | 0.12753900  | 1.88965100  | -0.42444700 |
| H  | 0.96834900  | 2.77963100  | 1.26116300  |
| H  | -0.91195200 | 2.57441200  | 1.26699200  |
| N  | -0.10700000 | 4.17554600  | -0.22200500 |
| H  | -0.32646100 | 4.90990900  | 0.45308400  |
| H  | 0.75877700  | 4.45772400  | -0.68595100 |
| H  | -0.83872900 | 4.20763300  | -0.93466900 |
| Cu | -1.84698200 | 1.58773600  | 0.27189800  |
| N  | -3.95237200 | -0.32085200 | -0.18460800 |
| C  | -2.38445600 | -2.19697100 | -0.38951400 |
| C  | -3.18226200 | -1.37986800 | 0.43200900  |
| C  | -4.51048000 | 1.72846900  | -1.08079100 |
| C  | -2.07540700 | -1.84267200 | -1.83067500 |
| C  | -3.26022400 | -1.56092000 | 1.82332100  |
| C  | -5.77436000 | 0.84537500  | -1.14722000 |
| C  | -3.88590700 | 1.96118500  | -2.47749500 |
| C  | -3.50903800 | 0.89341400  | -0.33307400 |
| C  | -5.37288400 | -0.56896700 | -0.69820600 |
| C  | -3.89923300 | -0.54921300 | 2.75201100  |
| C  | -1.91111700 | -3.55808800 | 1.56263000  |
| C  | -2.61475300 | -2.67387100 | 2.36724200  |
| C  | -4.74259500 | 3.06707400  | -0.36384700 |
| C  | -1.77476100 | -3.30258200 | 0.20411200  |
| C  | -1.93407200 | -3.05484400 | -2.74442600 |
| C  | -5.37550100 | -1.57493200 | -1.84003600 |
| C  | -2.80324600 | 0.25692300  | 3.45305200  |
| C  | -5.07687300 | 2.95050300  | 1.11578500  |
| C  | -6.25043900 | -1.09079200 | 0.42749800  |
| C  | -4.84012700 | -1.17707100 | 3.77548100  |
| C  | -0.80885500 | -0.98414100 | -1.88801100 |
| C  | -4.70077700 | 2.86269600  | -3.39062700 |
| H  | -2.89320400 | -1.22895600 | -2.22274000 |
| H  | -3.73455100 | 0.98310800  | -2.96062800 |
| H  | -5.55319200 | 3.59486300  | -0.88437400 |
| H  | 0.03203800  | -1.48608700 | -1.39121800 |
| H  | -2.65884700 | -2.84308300 | 3.44127400  |
| H  | -2.87969100 | 2.39007200  | -2.34243900 |
| H  | -6.19921200 | 0.82116900  | -2.15723200 |
| H  | -2.78505300 | -3.73979300 | -2.65166300 |
| H  | -7.26749100 | -1.21728100 | 0.04095800  |
| H  | -6.41570200 | -1.76440400 | -2.12633700 |
| H  | -6.55675500 | 1.23867000  | -0.48756100 |
| H  | -5.96153000 | 2.32486600  | 1.29231400  |
| H  | -5.73222300 | 2.50735500  | -3.50328700 |
| H  | -4.48423600 | 0.15857300  | 2.15173900  |
| H  | -0.96129100 | -0.01268200 | -1.39571500 |
| H  | -6.30045700 | -0.39051800 | 1.26848500  |
| H  | -4.24478400 | 2.51796800  | 1.68926000  |
| H  | -4.74051000 | 3.89107200  | -3.01613700 |
| H  | -1.01709500 | -3.61893300 | -2.53101700 |
| H  | -3.84055000 | 3.68836600  | -0.48906700 |
| H  | -1.17109200 | -3.96868700 | -0.40743800 |
| H  | -4.29935200 | -1.81541400 | 4.48451000  |
| H  | -0.52513000 | -0.78656500 | -2.92961500 |
| H  | -4.85467800 | -1.20283400 | -2.72840300 |
| H  | -3.24288700 | 1.03746000  | 4.08575100  |
| H  | -2.18359400 | -0.38983400 | 4.08780000  |
| H  | -5.61361100 | -1.78794500 | 3.29645100  |
| H  | -4.93537700 | -2.53256000 | -1.53751500 |
| H  | -2.13279900 | 0.74411500  | 2.72791500  |
| H  | -1.43365500 | -4.43174300 | 2.00185200  |
| H  | -1.87113100 | -2.72640600 | -3.78759300 |

|   |             |             |             |
|---|-------------|-------------|-------------|
| H | -4.25352000 | 2.89294000  | -4.38890000 |
| H | -5.33704200 | -0.39299800 | 4.35797000  |
| H | -5.28812400 | 3.93473300  | 1.54489900  |
| H | -5.90734000 | -2.06667300 | 0.79093500  |

### INT2-b

$E_{\text{solv}} = -2305.257094$  a.u.

Zero-point energy correction = 1.03239 a.u.

|    |            |             |             |
|----|------------|-------------|-------------|
| Cu | 1.40783100 | -0.60042900 | -0.76162300 |
| N  | 3.81748400 | 0.51125900  | 0.04074200  |
| C  | 3.32085800 | -0.71753500 | 2.10726500  |
| C  | 3.87405200 | -0.71978700 | 0.81184800  |
| C  | 2.81671400 | 2.11329700  | -1.28552900 |
| C  | 2.74040800 | 0.51634600  | 2.76900500  |
| C  | 4.31395200 | -1.90320000 | 0.19025500  |
| C  | 4.20376100 | 2.66123700  | -0.87068000 |
| C  | 1.66089100 | 2.89329700  | -0.61376100 |
| C  | 2.75689600 | 0.74465700  | -0.68262900 |
| C  | 4.89974600 | 1.58805200  | -0.00946700 |
| C  | 4.81228400 | -1.97252700 | -1.23903600 |
| C  | 3.71024700 | -3.11041500 | 2.21210300  |
| C  | 4.22697200 | -3.09114600 | 0.92307600  |
| C  | 2.61207400 | 2.04076400  | -2.80610300 |
| C  | 3.25592300 | -1.93260200 | 2.79081900  |
| C  | 3.39056700 | 0.79622000  | 4.12217300  |
| C  | 5.26458200 | 2.08602200  | 1.37957800  |
| C  | 3.87689900 | -2.80729900 | -2.11348200 |
| C  | 3.55648300 | 1.09867500  | -3.53495000 |
| C  | 6.15325000 | 1.02988700  | -0.66649800 |
| C  | 6.23837200 | -2.51421200 | -1.31611600 |
| C  | 1.22389000 | 0.41568300  | 2.91524800  |
| C  | 1.45205200 | 4.30118200  | -1.14502500 |
| H  | 2.92762100 | 1.37805400  | 2.12054000  |
| H  | 1.85165200 | 2.92863900  | 0.47241700  |
| H  | 2.71806100 | 3.05575200  | -3.21177100 |
| H  | 0.92123700 | -0.46288700 | 3.50098600  |
| H  | 4.56730100 | -4.01960800 | 0.46813900  |
| H  | 0.73141600 | 2.31458400  | -0.73736000 |
| H  | 4.09749900 | 3.59031800  | -0.29794800 |
| H  | 4.48294500 | 0.84066500  | 4.04931700  |
| H  | 6.90752000 | 1.82328200  | -0.70055100 |
| H  | 6.08591100 | 2.80375400  | 1.27982200  |
| H  | 4.81732800 | 2.90269100  | -1.74611700 |
| H  | 4.60862300 | 1.37502500  | -3.39037900 |
| H  | 2.37375300 | 4.89501700  | -1.10875100 |
| H  | 4.81430800 | -0.95905400 | -1.65449100 |
| H  | 0.73356600 | 0.35167100  | 1.93409800  |
| H  | 5.97666300 | 0.69793500  | -1.69484900 |
| H  | 3.43252000 | 0.05921300  | -3.20082400 |
| H  | 1.09720400 | 4.29418600  | -2.18162600 |
| H  | 3.13613400 | 0.02163300  | 4.85585700  |
| H  | 1.57290500 | 1.73513200  | -3.00008100 |
| H  | 2.83008200 | -1.95663400 | 3.79190400  |
| H  | 6.28354500 | -3.56336700 | -0.99901300 |
| H  | 0.83885900 | 1.31015600  | 3.42176800  |
| H  | 4.43855700 | 2.60479000  | 1.87558400  |
| H  | 4.24097700 | -2.82639400 | -3.14742900 |
| H  | 3.81016400 | -3.84420600 | -1.76068100 |
| H  | 6.92723100 | -1.94511900 | -0.68173500 |
| H  | 5.61756400 | 1.26829400  | 2.01942000  |
| H  | 2.85884900 | -2.39280300 | -2.12750400 |
| H  | 3.65422200 | -4.04608200 | 2.76278500  |
| H  | 3.03555800 | 1.75428200  | 4.51881600  |
| H  | 0.69887600 | 4.82323700  | -0.54554100 |
| H  | 6.60517700 | -2.46454400 | -2.34764400 |
| H  | 3.36535000 | 1.11638700  | -4.61221800 |
| H  | 6.57286700 | 0.19887900  | -0.08718400 |
| B  | 0.01200000 | -2.23949400 | -0.32083900 |
| H  | 0.24700800 | -1.40599900 | 0.59749300  |
| H  | 0.56613000 | -1.96232700 | -1.40064300 |

|                                              |             |             |             |    |             |             |             |
|----------------------------------------------|-------------|-------------|-------------|----|-------------|-------------|-------------|
| H                                            | -1.17891700 | -2.33199800 | -0.60663300 | C  | 3.36567600  | 1.40734700  | 0.56970700  |
| N                                            | 0.56301500  | -3.60960700 | 0.22986200  | C  | 4.18292800  | -2.05968600 | -0.46128400 |
| H                                            | 0.51623200  | -4.35031300 | -0.47189500 | C  | 3.97199100  | 2.17651600  | -1.81002800 |
| H                                            | 1.54147600  | -3.55263200 | 0.53318200  | C  | 2.72052800  | 1.61498800  | 1.80299300  |
| H                                            | 0.02726200  | -3.93756000 | 1.03581700  | C  | 5.38387000  | -1.75345800 | 0.45634800  |
| Cu                                           | -1.43136000 | -0.82090400 | 0.48274400  | C  | 4.59716300  | -2.20120300 | -1.94414400 |
| N                                            | -3.82935700 | 0.52779800  | 0.06929900  | C  | 3.31748700  | -0.82920800 | -0.36288800 |
| C                                            | -3.43341400 | -0.13551200 | -2.26141800 | C  | 5.35960500  | -0.24751400 | 0.74240900  |
| C                                            | -3.97790700 | -0.44141700 | -1.00047700 | C  | 2.39917800  | 0.48546900  | 2.75975800  |
| C                                            | -2.76963900 | 1.66329400  | 1.77313000  | C  | 2.40111300  | 3.93291700  | 1.16745500  |
| C                                            | -2.67189400 | 1.14238900  | -2.54933700 | C  | 2.26147500  | 2.90123200  | 2.08652300  |
| C                                            | -4.53550300 | -1.69941200 | -0.71119200 | C  | 3.38580200  | -3.29630300 | -0.00719900 |
| C                                            | -4.16352000 | 2.30861400  | 1.58891400  | C  | 2.97175100  | 3.68243100  | -0.07116300 |
| C                                            | -1.62829600 | 2.59736300  | 1.30399000  | C  | 5.04387700  | 3.17718900  | -2.23373100 |
| C                                            | -2.75795900 | 0.51314300  | 0.81164000  | C  | 6.34508000  | 0.53647300  | -0.11367100 |
| C                                            | -4.85252100 | 1.60986500  | 0.40220400  | C  | 0.93328100  | 0.08023500  | 2.60638900  |
| C                                            | -4.95132900 | -2.13080100 | 0.68081800  | C  | 2.65343100  | -3.14592600 | 1.31882800  |
| C                                            | -4.12557600 | -2.33301700 | -3.01771000 | C  | 5.61417800  | 0.07655200  | 2.20346500  |
| C                                            | -4.61051400 | -2.62765500 | -1.75163800 | C  | 2.71221700  | 0.81464900  | 4.21550100  |
| C                                            | -2.51762500 | 1.17027300  | 3.20590000  | C  | 2.80445100  | 2.19780600  | -2.79785900 |
| C                                            | -3.52849700 | -1.10386800 | -3.26149700 | C  | 5.38957100  | -3.45969800 | -2.25995300 |
| C                                            | -3.15675800 | 1.84530300  | -3.81424800 | H  | 4.41401700  | 1.17421500  | -1.85681700 |
| C                                            | -5.07479800 | 2.53747400  | -0.78265900 | H  | 5.18302900  | -1.31623000 | -2.23434000 |
| C                                            | -3.97703600 | -3.17442000 | 1.23039100  | H  | 4.08527500  | -4.14115500 | 0.05390800  |
| C                                            | -3.42245300 | 0.03291900  | 3.65336500  | H  | 2.31025600  | 3.17770400  | -2.80826100 |
| C                                            | -6.17982900 | 0.97363900  | 0.78266700  | H  | 1.76767000  | 3.09221700  | 3.03791100  |
| C                                            | -6.38256900 | -2.65926800 | 0.72680700  | H  | 3.68904500  | -2.17602700 | -2.56756600 |
| C                                            | -1.16920400 | 0.87580600  | -2.62648100 | H  | 6.33665300  | -2.04517700 | -0.00006600 |
| C                                            | -1.38532500 | 3.79997000  | 2.20036900  | H  | 5.88067400  | 3.20642700  | -1.52675500 |
| H                                            | -2.81704100 | 1.83103000  | -1.71138700 | H  | 6.65231700  | -0.18779900 | 2.43259400  |
| H                                            | -1.85155100 | 2.93723800  | 0.27865200  | H  | 7.36220200  | 0.26914300  | 0.19197300  |
| H                                            | -2.63524300 | 2.02601900  | 3.88438100  | H  | 5.30092200  | -2.31078300 | 1.39740400  |
| H                                            | -0.91857000 | 0.13559500  | -3.39823900 | H  | 3.33010800  | -2.86960600 | 2.13827300  |
| H                                            | -5.03919100 | -3.60877200 | -1.55660600 | H  | 6.27513100  | -3.55717300 | -1.62036100 |
| H                                            | -0.70166800 | 2.00588700  | 1.22901000  | H  | 2.99310000  | -0.39154400 | 2.47779500  |
| H                                            | -4.07962700 | 3.38502300  | 1.39874200  | H  | 2.04364300  | 1.44805400  | -2.53708800 |
| H                                            | -4.23891800 | 2.01741700  | -3.79301700 | H  | 4.97356900  | -0.49928300 | 2.87876500  |
| H                                            | -6.89301200 | 1.77202600  | 1.01393200  | H  | 1.86474600  | -2.38190400 | 1.26771500  |
| H                                            | -5.85802100 | 3.25443400  | -0.51421200 | H  | 4.78508300  | -4.36409200 | -2.13327900 |
| H                                            | -4.76999400 | 2.19852100  | 2.49531300  | H  | 4.63802100  | 4.19299300  | -2.31303200 |
| H                                            | -4.48609900 | 0.29438600  | 3.57763800  | H  | 2.66262000  | -3.55620300 | -0.79734400 |
| H                                            | -2.29523600 | 4.39511200  | 2.34543700  | H  | 3.03065100  | 4.48312800  | -0.80575200 |
| H                                            | -4.89458400 | -1.26286800 | 1.34698300  | H  | 2.05046500  | 1.59785400  | 4.60481800  |
| H                                            | -0.78537300 | 0.50121900  | -1.66225400 | H  | 3.15627800  | 1.98306700  | -3.81371600 |
| H                                            | -6.09793200 | 0.33709300  | 1.67001200  | H  | 6.24804100  | 0.31118700  | -1.18107800 |
| H                                            | -3.25857200 | -0.87457400 | 3.05593000  | H  | 0.70711300  | -0.77513900 | 3.25616300  |
| H                                            | -1.01936800 | 3.50203900  | 3.18900400  | H  | 0.26130400  | 0.90506400  | 2.88678600  |
| H                                            | -2.92822500 | 1.26209200  | -4.71445900 | H  | 3.74626800  | 1.15386700  | 4.34427500  |
| H                                            | -1.46689500 | 0.85349800  | 3.28567700  | H  | 6.22640200  | 1.61611000  | 0.03476800  |
| H                                            | -3.11262000 | -0.89468000 | -4.24517300 | H  | 0.69758300  | -0.20870400 | 1.57051600  |
| H                                            | -6.48688700 | -3.58922500 | 0.15463000  | H  | 2.03269600  | 4.92765600  | 1.40711200  |
| H                                            | -0.63460900 | 1.80750800  | -2.85407100 | H  | 5.44066400  | 2.90670500  | -3.21883700 |
| H                                            | -4.18045300 | 3.11361400  | -1.04076900 | H  | 5.73563400  | -3.43779100 | -3.29783400 |
| H                                            | -4.26754000 | -3.46989100 | 2.24576300  | H  | 2.56373900  | -0.07387700 | 4.83960900  |
| H                                            | -3.96096300 | -4.07593100 | 0.60511200  | H  | 2.17288200  | -4.08716800 | 1.60389100  |
| H                                            | -7.09725000 | -1.93493700 | 0.32008800  | H  | 5.49129800  | 1.14593800  | 2.41126000  |
| H                                            | -5.41909500 | 1.98603900  | -1.66566200 | B  | -0.13141400 | -1.43260700 | -2.36838900 |
| H                                            | -2.94816200 | -2.78594100 | 1.27717100  | H  | -0.01153500 | -1.78874100 | -1.17563100 |
| H                                            | -4.19326300 | -3.07210800 | -3.81204300 | H  | 0.68034400  | -0.56173400 | -2.71420500 |
| H                                            | -2.65896900 | 2.81605100  | -3.91837700 | H  | -1.22065100 | -0.89457100 | -2.63822200 |
| H                                            | -0.62995700 | 4.45664500  | 1.75600900  | N  | 0.03317600  | -2.71368600 | -3.27685300 |
| H                                            | -6.67009600 | -2.87698400 | 1.76173500  | H  | -0.04337700 | -2.49150200 | -4.27070100 |
| H                                            | -3.22983600 | -0.22887200 | 4.69823200  | H  | 0.93788600  | -3.17181700 | -3.15238700 |
| H                                            | -6.59430000 | 0.38655400  | -0.04571300 | H  | -0.67837500 | -3.41996900 | -3.08030800 |
| INT2-c                                       |             |             |             | Cu | -1.84347000 | -1.13415700 | -1.05328400 |
| E <sub>solv</sub> = -2305.258475 a.u.        |             |             |             | N  | -3.74383700 | 0.13078800  | 0.61931000  |
| Zero-point energy correction = 1.032036 a.u. |             |             |             | C  | -2.83440000 | 2.23609300  | -0.30008700 |
| Cu                                           | 1.63692700  | -0.77472400 | -1.25503300 | C  | -3.80570300 | 1.22030800  | -0.33428300 |
| N                                            | 3.93302100  | 0.10182300  | 0.30890400  | C  | -3.17380000 | -1.89468200 | 1.56929100  |
| C                                            | 3.46225000  | 2.41687500  | -0.40339900 | C  | -1.58258800 | 2.17537900  | 0.55056500  |

|                                              |             |             |             |    |             |             |             |
|----------------------------------------------|-------------|-------------|-------------|----|-------------|-------------|-------------|
| C                                            | -4.82876100 | 1.19973900  | -1.30022700 | C  | 4.07764400  | 3.08808800  | -0.18006800 |
| C                                            | -4.27285500 | -1.26296000 | 2.44925700  | C  | 1.89436300  | -3.59826200 | 0.32124700  |
| C                                            | -1.80081900 | -1.92779200 | 2.27397200  | C  | 2.20682100  | -2.91904900 | 3.17845000  |
| C                                            | -3.03170000 | -0.94076400 | 0.41514500  | C  | 5.42697700  | -1.16427900 | 1.78384900  |
| C                                            | -4.47667400 | 0.17778000  | 1.95795500  | C  | 2.23979300  | -0.42272200 | -3.41066300 |
| C                                            | -5.73854100 | 0.00711800  | -1.51258500 | C  | 4.13587100  | 2.83809000  | -1.68018500 |
| C                                            | -4.02329000 | 3.34124400  | -2.10374400 | C  | 6.04498400  | -1.03334500 | -0.60891900 |
| C                                            | -4.92192900 | 2.28566800  | -2.17118300 | C  | 4.38546300  | -1.67252800 | -3.78761900 |
| C                                            | -3.54115200 | -3.29578600 | 1.05399200  | C  | 0.85641000  | -1.07497300 | 2.16225900  |
| C                                            | -2.97843400 | 3.30028800  | -1.19302600 | C  | 4.46500500  | 3.24934500  | 2.80446500  |
| C                                            | -1.36699300 | 3.43180400  | 1.38970600  | H  | 2.97582800  | -1.11968500 | 2.34589000  |
| C                                            | -3.81009400 | 1.20864900  | 2.85831900  | H  | 3.76268000  | 1.21351600  | 2.73633200  |
| C                                            | -5.28657100 | -0.76381100 | -2.75468600 | H  | 4.91791300  | 3.72880500  | 0.12058900  |
| C                                            | -4.71986900 | -3.34135400 | 0.09398900  | H  | 0.03218600  | -1.70170600 | 1.80089500  |
| C                                            | -5.94004200 | 0.54054300  | 1.78198200  | H  | 2.52872000  | -3.53646000 | -3.00614900 |
| C                                            | -7.21251000 | 0.38539900  | -1.62125600 | H  | 2.60870900  | 2.39040200  | 2.13258300  |
| C                                            | -0.37102400 | 1.92195900  | -0.34982800 | H  | 6.08866500  | 1.31020600  | 1.52669900  |
| C                                            | -1.68682300 | -2.92423700 | 3.41544400  | H  | 3.09944000  | -3.55107000 | 3.10146500  |
| H                                            | -1.65980900 | 1.32100900  | 1.23535000  | H  | 7.09782500  | -0.98260100 | -0.31056300 |
| H                                            | -1.57599100 | -0.91700300 | 2.64665200  | H  | 6.50265400  | -1.19738500 | 1.98827100  |
| H                                            | -3.75100300 | -3.92988200 | 1.92619600  | H  | 6.06897700  | 1.46368600  | -0.22593100 |
| H                                            | -0.21185900 | 2.74930400  | -1.05357600 | H  | 5.02142500  | 2.25791000  | -1.97072100 |
| H                                            | -5.70515100 | 2.29496300  | -2.92653500 | H  | 5.54537000  | 3.06179500  | 2.78020400  |
| H                                            | -1.02780200 | -2.15070000 | 1.52037000  | H  | 4.03521400  | -0.18208500 | -2.30012600 |
| H                                            | -4.00245700 | -1.27303700 | 3.51148800  | H  | 0.88052500  | -0.16295100 | 1.54365700  |
| H                                            | -2.24529000 | 3.67444900  | 1.99802500  | H  | 5.94778500  | -0.50696900 | -1.56414800 |
| H                                            | -6.41107700 | 0.55734700  | 2.77084500  | H  | 3.25081700  | 2.28950500  | -2.03447200 |
| H                                            | -4.33139100 | 1.22014100  | 3.82150500  | H  | 4.28282800  | 4.21729800  | 2.32529100  |
| H                                            | -5.21101600 | -1.82330300 | 2.35742300  | H  | 1.32308900  | -3.56734800 | 3.11936400  |
| H                                            | -5.63029700 | -2.91111500 | 0.53159300  | H  | 3.16511300  | 3.65482300  | 0.06489700  |
| H                                            | -2.46724200 | -2.77453000 | 4.17135500  | H  | 1.40712100  | -4.22669000 | 1.06338900  |
| H                                            | -5.63041900 | -0.67304800 | -0.65931200 | H  | 3.85068000  | -2.43784800 | -4.36314900 |
| H                                            | -0.51118300 | 1.00899400  | -0.95117000 | H  | 0.62984300  | -0.76813000 | 3.19133800  |
| H                                            | -6.47856800 | -0.19264800 | 1.17255100  | H  | 4.94482000  | -0.68720800 | 2.64332700  |
| H                                            | -4.50744400 | -2.79624400 | -0.83566300 | H  | 2.52660400  | 0.30231100  | -4.18221900 |
| H                                            | -1.75454500 | -3.95857800 | 3.06219300  | H  | 1.63482500  | -1.20670400 | -3.88529800 |
| H                                            | -1.14291200 | 4.30190200  | 0.75976700  | H  | 5.26035100  | -2.14769600 | -3.32930500 |
| H                                            | -2.65281900 | -3.72608400 | 0.56504700  | H  | 5.07328300  | -2.19899200 | 1.70188700  |
| H                                            | -2.24334900 | 4.10275100  | -1.18340800 | H  | 1.59843600  | 0.09265300  | -2.67884100 |
| H                                            | -7.41419900 | 0.97353300  | -2.52469200 | H  | 1.58941500  | -5.01501400 | -1.26565000 |
| H                                            | 0.54296600  | 1.81174200  | 0.24746400  | H  | 2.19867400  | -2.45765500 | 4.17192700  |
| H                                            | -2.75609300 | 0.97764700  | 3.05229600  | H  | 4.17159500  | 3.34163500  | 3.85468300  |
| H                                            | -5.90071400 | -1.66208500 | -2.89375500 | H  | 4.74015700  | -0.92011700 | -4.50115100 |
| H                                            | -5.37908600 | -0.14543000 | -3.65654600 | H  | 4.17469000  | 3.78309200  | -2.23115800 |
| H                                            | -7.54788100 | 0.97161700  | -0.75808900 | H  | 5.78942700  | -2.08986500 | -0.75169500 |
| H                                            | -3.88161800 | 2.21485400  | 2.42928500  | B  | -0.15970200 | 3.46308700  | 0.20130600  |
| H                                            | -4.23560700 | -1.07721900 | -2.67334100 | H  | 0.02945900  | 1.88218100  | -0.90973300 |
| H                                            | -4.11932500 | 4.18286600  | -2.78515600 | H  | 0.81500200  | 3.26685600  | 0.85018000  |
| H                                            | -0.51236200 | 3.29412700  | 2.06273800  | H  | -1.26672900 | 3.20949400  | 0.55582800  |
| H                                            | -0.71854900 | -2.81332000 | 3.91620900  | N  | -0.00052500 | 4.28869700  | -1.10690300 |
| H                                            | -7.82792100 | -0.51970200 | -1.67894500 | H  | -0.05865000 | 5.27447800  | -0.82456600 |
| H                                            | -4.95454500 | -4.37411700 | -0.18161300 | H  | 0.89554700  | 4.15359300  | -1.57829300 |
| H                                            | -6.06051300 | 1.53598300  | 1.33846800  | H  | -0.73619400 | 4.11922300  | -1.79536900 |
| <b>TS6-a</b>                                 |             |             |             | Cu | -1.32374400 | 1.16075000  | -0.44293800 |
| $E_{\text{rel}} = -2381.660471$ a.u.         |             |             |             | N  | -3.69881600 | -0.48626400 | -0.04067900 |
| Zero-point energy correction = 1.046402 a.u. |             |             |             | C  | -2.31537500 | -2.51611500 | -0.06084800 |
| Cu                                           | 1.31927200  | 1.19563300  | -0.26553600 | C  | -2.95526200 | -1.50195500 | 0.67277100  |
| N                                            | 3.72794500  | -0.37402800 | 0.10753900  | C  | -4.19060500 | 1.41756800  | -1.24234200 |
| C                                            | 2.41231000  | -2.35948000 | 0.70400500  | C  | -2.15577800 | -2.45220700 | -1.56612600 |
| C                                            | 3.04708300  | -1.58839400 | -0.28583500 | C  | -2.90682000 | -1.44324100 | 2.07637300  |
| C                                            | 4.11868100  | 1.81921800  | 0.68557300  | C  | -5.52077900 | 0.66667300  | -1.01917000 |
| C                                            | 2.18245500  | -1.83495100 | 2.10682900  | C  | -3.74172800 | 1.39511200  | -2.72197100 |
| C                                            | 3.05543500  | -1.96216300 | -1.64026700 | C  | -3.16273900 | 0.61033500  | -0.49280700 |
| C                                            | 5.48643700  | 1.10905900  | 0.63321000  | C  | -5.18772200 | -0.67159200 | -0.34303500 |
| C                                            | 3.67930100  | 2.13250400  | 2.13640600  | C  | -3.34771700 | -0.21828700 | 2.85154500  |
| C                                            | 3.14391400  | 0.78830300  | 0.17804500  | C  | -1.75858000 | -3.57810700 | 2.04771400  |
| C                                            | 5.21146400  | -0.39311800 | 0.48822000  | C  | -2.31533800 | -2.51518900 | 2.74672700  |
| C                                            | 3.48322900  | -1.01893400 | -2.74620300 | C  | -4.22639700 | 2.86020900  | -0.71402700 |
| C                                            | 1.98673500  | -4.03983700 | -0.99252700 | C  | -1.72418200 | -3.55640500 | 0.65946600  |
| C                                            | 2.53106600  | -3.21438200 | -1.96662900 | C  | -2.32768400 | -3.80159600 | -2.25538800 |

|                                              |             |             |             |    |             |             |             |
|----------------------------------------------|-------------|-------------|-------------|----|-------------|-------------|-------------|
| C                                            | -5.39791200 | -1.86245000 | -1.26755400 | C  | 1.39769900  | 0.45716500  | 3.21240800  |
| C                                            | -2.12276200 | 0.62665400  | 3.21172700  | C  | 1.34914800  | 3.95493400  | -1.48265400 |
| C                                            | -4.38274300 | 2.98692800  | 0.79349500  | H  | 2.86531700  | 1.56640200  | 2.16223900  |
| C                                            | -5.97796000 | -0.89250800 | 0.93607000  | H  | 1.82408200  | 2.88087700  | 0.32539400  |
| C                                            | -4.15782300 | -0.54475000 | 4.10122700  | H  | 2.43730400  | 2.27028500  | -3.37362700 |
| C                                            | -0.79322900 | -1.85239300 | -1.91182400 | H  | 1.29426200  | -0.26374800 | 4.03379800  |
| C                                            | -4.61311600 | 2.21344300  | -3.66103700 | H  | 5.22237300  | -3.77002600 | 1.44107900  |
| H                                            | -2.91652300 | -1.77512400 | -1.96878700 | H  | 0.63618200  | 2.08311500  | -0.69626100 |
| H                                            | -3.71061500 | 0.34778100  | -3.06239600 | H  | 4.03577400  | 3.39549900  | -0.81576500 |
| H                                            | -5.05179900 | 3.38466300  | -1.21429200 | H  | 4.50199600  | 1.76148900  | 4.08147700  |
| H                                            | 0.01921200  | -2.46103600 | -1.49685300 | H  | 6.83756700  | 1.67161800  | -0.81581900 |
| H                                            | -2.26734800 | -2.50341500 | 3.83388300  | H  | 5.94046700  | 3.04998700  | 0.90406800  |
| H                                            | -2.70298500 | 1.76170100  | -2.77486000 | H  | 4.64268500  | 2.34308300  | -2.08484300 |
| H                                            | -6.05025900 | 0.49480500  | -1.96337600 | H  | 4.30205200  | 0.53874600  | -3.32696500 |
| H                                            | -3.26400300 | -4.29356200 | -1.96715500 | H  | 2.26633500  | 4.55094100  | -1.56295800 |
| H                                            | -7.03458200 | -1.00623400 | 0.67039100  | H  | 4.70402000  | -1.25507400 | -1.27383200 |
| H                                            | -6.47418100 | -1.98413900 | -1.43050000 | H  | 0.95191300  | 0.00310300  | 2.31291700  |
| H                                            | -6.19707600 | 1.25066400  | -0.38418700 | H  | 5.94345800  | 0.34269300  | -1.56195400 |
| H                                            | -5.31159100 | 2.52580000  | 1.15302500  | H  | 3.12103800  | -0.67989800 | -2.81161400 |
| H                                            | -5.66945500 | 1.92580100  | -3.59573100 | H  | 0.97860300  | 3.77682200  | -2.49848600 |
| H                                            | -3.97580100 | 0.39954300  | 2.19888600  | H  | 3.36107000  | 0.86858100  | 5.10077800  |
| H                                            | -0.68259000 | -0.83453800 | -1.50501400 | H  | 1.30544700  | 1.04518900  | -2.81213900 |
| H                                            | -5.90096600 | -0.04391100 | 1.62400400  | H  | 3.61523400  | -1.25107300 | 4.50357600  |
| H                                            | -3.54933700 | 2.51538600  | 1.33265000  | H  | 6.23877200  | -3.78857500 | -0.50691400 |
| H                                            | -4.54524800 | 3.28559500  | -3.44734100 | H  | 0.81511700  | 1.35156600  | 3.46952800  |
| H                                            | -1.50079300 | -4.48403200 | -2.02099800 | H  | 4.31092400  | 2.86064500  | 1.55651300  |
| H                                            | -3.30402100 | 3.37100100  | -1.03370300 | H  | 3.74831000  | -3.31049100 | -2.23337400 |
| H                                            | -1.22285200 | -4.35930000 | 0.12229000  | H  | 3.64798000  | -4.04314000 | -0.61527900 |
| H                                            | -3.54942500 | -1.05651900 | 4.85686800  | H  | 6.95605500  | -2.17077800 | -0.60550600 |
| H                                            | -0.65811500 | -1.79387300 | -2.99956700 | H  | 5.58574700  | 1.67330700  | 1.95665400  |
| H                                            | -4.93202300 | -1.71816300 | -2.24817100 | H  | 2.66678400  | -2.61358100 | -1.00568200 |
| H                                            | -2.43014700 | 1.56059200  | 3.69847300  | H  | 4.69423900  | -3.36268500 | 3.81791100  |
| H                                            | -1.46377000 | 0.08438800  | 3.90247500  | H  | 2.89745500  | 2.43443300  | 4.42919500  |
| H                                            | -5.01875300 | -1.18365100 | 3.87370800  | H  | 0.60276400  | 4.56620300  | -0.96427000 |
| H                                            | -5.02224300 | -2.79131500 | -0.82236000 | H  | 6.26805600  | -2.93447000 | -2.05195800 |
| H                                            | -1.52930400 | 0.88373900  | 2.32035000  | H  | 2.97544600  | 0.08516000  | -4.39505000 |
| H                                            | -1.30842800 | -4.40824300 | 2.58814800  | H  | 6.55527200  | 0.18891600  | 0.10821600  |
| H                                            | -2.33370100 | -3.66597900 | -3.34264900 | B  | -0.47815700 | -2.27313900 | -1.68921200 |
| H                                            | -4.29633400 | 2.06420500  | -4.69782700 | H  | 0.04042700  | -1.78352600 | 0.11177300  |
| H                                            | -4.53015300 | 0.37944200  | 4.55756000  | H  | 0.46069600  | -1.76207800 | -2.21064200 |
| H                                            | -4.40927000 | 4.03936100  | 1.09355800  | H  | -1.56115700 | -1.78355300 | -1.59062700 |
| H                                            | -5.66468600 | -1.80647500 | 1.45430900  | N  | -0.35272700 | -3.76875000 | -1.28537000 |
| O                                            | -0.37549400 | 5.51128400  | 1.21199100  | H  | -0.61824800 | -4.30538800 | -2.11920900 |
| H                                            | -1.23006300 | 5.59465200  | 1.65163300  | H  | 0.58901000  | -4.05982500 | -1.01894900 |
| H                                            | 0.28189100  | 5.62153700  | 1.90919500  | H  | -0.98261800 | -4.04944300 | -0.53222100 |
| <b>TS6-b</b>                                 |             |             |             | Cu | -1.20664000 | -0.73772400 | 0.29091900  |
| $E_{\text{solv}} = -2381.668786$ a.u.        |             |             |             | N  | -3.75578000 | 0.52165500  | 0.04549800  |
| Zero-point energy correction = 1.052189 a.u. |             |             |             | C  | -3.60819400 | 0.13216900  | -2.37319300 |
| Cu                                           | 1.22914900  | -0.71155200 | -0.19636300 | C  | -3.98521200 | -0.33335300 | -1.10186700 |
| N                                            | 3.79868500  | 0.43579900  | 0.22672000  | C  | -2.63222600 | 1.51455400  | 1.79607600  |
| C                                            | 3.64099500  | -0.38676800 | 2.53668700  | C  | -2.86518800 | 1.43457400  | -2.58619900 |
| C                                            | 4.02666200  | -0.61010900 | 1.20304300  | C  | -4.49843700 | -1.62745100 | -0.90081600 |
| C                                            | 2.67966000  | 1.74337400  | -1.30672100 | C  | -4.02485600 | 2.18169000  | 1.71227200  |
| C                                            | 2.85981000  | 0.83391800  | 2.97724800  | C  | -1.49325000 | 2.48384100  | 1.40227300  |
| C                                            | 4.56671700  | -1.83534100 | 0.77512000  | C  | -2.64146600 | 0.46585700  | 0.72118300  |
| C                                            | 4.09216900  | 2.34885600  | -1.13702600 | C  | -4.79187500 | 1.52638200  | 0.54990200  |
| C                                            | 1.57589300  | 2.65714700  | -0.72627300 | C  | -4.72972600 | -2.22411600 | 0.47202800  |
| C                                            | 2.67867800  | 0.52129200  | -0.43332000 | C  | -4.41216100 | -1.96131200 | -3.30279900 |
| C                                            | 4.83710500  | 1.51196100  | -0.08217300 | C  | -4.70792300 | -2.42481900 | -2.02722600 |
| C                                            | 4.77574100  | -2.17649000 | -0.68567800 | C  | -2.34677900 | 0.87880300  | 3.16585600  |
| C                                            | 4.49528200  | -2.59084600 | 3.07856100  | C  | -3.84637100 | -0.70281300 | -3.46808700 |
| C                                            | 4.80340000  | -2.81237500 | 1.74353200  | C  | -3.43592100 | 2.27102300  | -3.72666700 |
| C                                            | 2.35757200  | 1.36222700  | -2.76048400 | C  | -5.17444800 | 2.52258800  | -0.53378800 |
| C                                            | 3.90043600  | -1.39755500 | 3.46359400  | C  | -3.63573200 | -3.24402900 | 0.79162800  |
| C                                            | 3.44395300  | 1.50899700  | 4.21430400  | C  | -3.26621000 | -0.26956200 | 3.54835800  |
| C                                            | 5.17449300  | 2.31223500  | 1.16623500  | C  | -6.04525100 | 0.79326800  | 1.00342300  |
| C                                            | 3.64710400  | -3.09221600 | -1.16321200 | C  | -6.11148400 | -2.85391800 | 0.62194600  |
| C                                            | 3.23775800  | 0.27123900  | -3.34896400 | C  | -1.37856500 | 1.16036800  | -2.80539300 |
| C                                            | 6.10964200  | 0.87684500  | -0.62045600 | C  | -1.25818000 | 3.62994700  | 2.37154800  |
| C                                            | 6.13738300  | -2.80062000 | -0.97214100 | H  | -2.93630400 | 2.02840100  | -1.66938400 |

|                                              |             |             |             |    |             |             |             |
|----------------------------------------------|-------------|-------------|-------------|----|-------------|-------------|-------------|
| H                                            | -1.70954600 | 2.88705400  | 0.39790100  | H  | 5.58766600  | -2.42904700 | -0.39048000 |
| H                                            | -2.41206000 | 1.67073400  | 3.92432000  | H  | 5.56180500  | 2.71760900  | -2.17855700 |
| H                                            | -1.20785400 | 0.51380400  | -3.67764400 | H  | 6.47998200  | -0.56811400 | 1.85017700  |
| H                                            | -5.10637700 | -3.42940000 | -1.90172600 | H  | 6.90105800  | -0.27016100 | -0.49400800 |
| H                                            | -0.56530200 | 1.89867400  | 1.29750000  | H  | 4.68059400  | -2.50943400 | 1.11522400  |
| H                                            | -3.93134900 | 3.26003900  | 1.53800100  | H  | 2.79930400  | -2.91176800 | 2.10309200  |
| H                                            | -4.51262200 | 2.43861200  | -3.60917700 | H  | 5.16924500  | -3.96125400 | -1.90121200 |
| H                                            | -6.77026100 | 1.53389400  | 1.35752300  | H  | 2.87982900  | -0.26703100 | 2.40989800  |
| H                                            | -5.95449400 | 3.17853300  | -0.13245000 | H  | 1.34772900  | 1.69232200  | -2.42650600 |
| H                                            | -4.58049500 | 2.06429700  | 2.64974800  | H  | 4.86246400  | -0.64190900 | 2.55103900  |
| H                                            | -4.32301800 | 0.02698500  | 3.54643800  | H  | 1.45472000  | -1.97741500 | 1.42853900  |
| H                                            | -2.16428100 | 4.22655100  | 2.53284700  | H  | 3.54466500  | -4.58720100 | -2.22194300 |
| H                                            | -4.64610200 | -1.42601300 | 1.21745500  | H  | 4.38989000  | 3.91357500  | -2.75506600 |
| H                                            | -0.93490000 | 0.66434100  | -1.92784600 | H  | 1.61360100  | -3.32319700 | -0.71645200 |
| H                                            | -5.85013000 | 0.10103600  | 1.82929300  | H  | 3.08104600  | 4.47832000  | -1.04639000 |
| H                                            | -3.15463300 | -1.12362500 | 2.86644400  | H  | 2.56876400  | 1.87753000  | 4.57313100  |
| H                                            | -0.91498600 | 3.27445500  | 3.34967500  | H  | 2.29532600  | 1.95066400  | -3.90946900 |
| H                                            | -3.27402200 | 1.79418700  | -4.70098400 | H  | 5.60084200  | -0.09006600 | -1.68181900 |
| H                                            | -1.30522400 | 0.52620400  | 3.17385300  | H  | 0.70757100  | -0.30838900 | 3.51149500  |
| H                                            | -3.57800700 | -0.36073800 | -4.46613600 | H  | 0.46133100  | 1.42075200  | 3.19164600  |
| H                                            | -6.22489900 | -3.74084400 | -0.01303100 | H  | 4.12430800  | 1.18292900  | 4.08584800  |
| H                                            | -0.84087700 | 2.10340700  | -2.96768600 | H  | 5.94567100  | 1.21925100  | -0.52251800 |
| H                                            | -4.33640200 | 3.15971200  | -0.83382300 | H  | 0.52818600  | 0.27243500  | 1.83761200  |
| H                                            | -3.78577700 | -3.67292300 | 1.78942000  | H  | 2.54287800  | 5.11364200  | 1.27523700  |
| H                                            | -3.63592500 | -4.06642100 | 0.06397900  | H  | 4.78002200  | 2.51190300  | -3.75727100 |
| H                                            | -6.90912200 | -2.14961400 | 0.35991700  | H  | 4.47791100  | -3.84159500 | -3.52148600 |
| H                                            | -5.58646900 | 2.02253500  | -1.41840700 | H  | 2.86563700  | 0.15285600  | 4.79650900  |
| H                                            | -2.63963300 | -2.77154600 | 0.78170300  | H  | 1.28434700  | -3.71761800 | 1.69359000  |
| H                                            | -4.60735800 | -2.58987600 | -4.16921000 | H  | 5.51093200  | 0.90758200  | 1.94169100  |
| H                                            | -2.93990000 | 3.24761600  | -3.75707200 | B  | 0.11380600  | -0.81700300 | -3.82522100 |
| H                                            | -0.48703200 | 4.30109500  | 1.97853900  | H  | -0.34822100 | -0.30503200 | -2.14500900 |
| H                                            | -6.26617700 | -3.17305800 | 1.65874200  | H  | 1.28127200  | -0.74776700 | -3.59279100 |
| H                                            | -3.03607300 | -0.62980300 | 4.55569000  | H  | -0.55807600 | 0.07034800  | -4.22443900 |
| H                                            | -6.50955100 | 0.24354800  | 0.17574600  | N  | -0.52854000 | -2.23610900 | -3.76006600 |
| O                                            | -1.20190500 | -3.01816900 | -3.70299900 | H  | -0.31676700 | -2.67549500 | -4.66384400 |
| H                                            | -0.64368600 | -2.70449200 | -4.42483800 | H  | -0.15394100 | -2.84115500 | -3.02676000 |
| H                                            | -2.04720500 | -2.55864300 | -3.81222200 | H  | -1.54493000 | -2.22790200 | -3.66220300 |
| <b>TS6-c</b>                                 |             |             |             | Cu | -1.39854600 | -0.51027000 | -0.93961700 |
| $E_{\text{solv}} = -2381.668786$ a.u.        |             |             |             | N  | -3.65529700 | 0.15757700  | 0.63866500  |
| Zero-point energy correction = 1.052189 a.u. |             |             |             | C  | -3.06594000 | 2.50635000  | 0.14361000  |
| Cu                                           | 1.04758700  | -0.45671500 | -1.30804900 | C  | -3.82353500 | 1.35939100  | -0.15141100 |
| N                                            | 3.54028800  | 0.03756900  | 0.10890600  | C  | -2.82155600 | -1.85890000 | 1.38907700  |
| C                                            | 3.26802200  | 2.37906300  | -0.62799200 | C  | -1.86483700 | 2.49936800  | 1.06721200  |
| C                                            | 3.19568300  | 1.41498100  | 0.39288400  | C  | -4.74128500 | 1.32497800  | -1.21749400 |
| C                                            | 3.41531000  | -2.14719100 | -0.63014300 | C  | -4.13667300 | -1.58527000 | 2.14716500  |
| C                                            | 3.48440800  | 2.04298700  | -2.09002100 | C  | -1.57912200 | -1.74062400 | 2.29548900  |
| C                                            | 2.79731800  | 1.74392800  | 1.70220400  | C  | -2.73245800 | -0.72969600 | 0.39946500  |
| C                                            | 4.73782300  | -1.99499600 | 0.14832400  | C  | -4.52213800 | -0.12692000 | 1.86260400  |
| C                                            | 3.64823800  | -2.41212500 | -2.13434400 | C  | -5.35447900 | 0.03583800  | -1.72423900 |
| C                                            | 2.74715400  | -0.80138400 | -0.49640200 | C  | -4.31343300 | 3.68352700  | -1.57391800 |
| C                                            | 4.95296300  | -0.49420700 | 0.37200100  | C  | -4.97831700 | 2.51211300  | -1.91016800 |
| C                                            | 2.47017300  | 0.69370100  | 2.74335100  | C  | -2.80017000 | -3.20941000 | 0.65356700  |
| C                                            | 2.71533600  | 4.06986100  | 1.02491100  | C  | -3.34880400 | 3.66873200  | -0.57776700 |
| C                                            | 2.57709300  | 3.08931500  | 1.99808800  | C  | -1.88022100 | 3.61562400  | 2.10635300  |
| C                                            | 2.47986500  | -3.21939700 | -0.04112500 | C  | -4.12411500 | 0.82987200  | 2.97888400  |
| C                                            | 3.02914100  | 3.71051100  | -0.27689100 | C  | -4.58923900 | -0.42152600 | -2.96863500 |
| C                                            | 4.61979400  | 2.84167300  | -2.72443000 | C  | -3.77435200 | -3.33282800 | -0.50766100 |
| C                                            | 5.89408800  | 0.13140700  | -0.64985700 | C  | -6.00020700 | 0.04347700  | 1.56289200  |
| C                                            | 0.95496700  | 0.51029200  | 2.82306400  | C  | -6.84718100 | 0.14225900  | -2.01735400 |
| C                                            | 1.98381100  | -2.93918700 | 1.36940500  | C  | -0.59355300 | 2.58203200  | 0.21840900  |
| C                                            | 5.46171300  | -0.17314800 | 1.76476800  | C  | -1.41473300 | -2.85634400 | 3.31337200  |
| C                                            | 3.04482300  | 0.99825700  | 4.12239800  | H  | -1.83660500 | 1.54239700  | 1.60490900  |
| C                                            | 2.18224200  | 2.26261600  | -2.86412700 | H  | -1.60797300 | -0.77221700 | 2.81673300  |
| C                                            | 4.24138800  | -3.77495400 | -2.45506800 | H  | -3.00352900 | -3.99814400 | 1.39060100  |
| H                                            | 3.73811300  | 0.97837100  | -2.17631300 | H  | -0.53096000 | 3.54037300  | -0.31415700 |
| H                                            | 4.30007700  | -1.62305800 | -2.53850900 | H  | -5.68454000 | 2.51376200  | -2.73791300 |
| H                                            | 3.00461600  | -4.18395400 | -0.06189000 | H  | -0.69058700 | -1.70607600 | 1.64531900  |
| H                                            | 1.88855400  | 3.31997200  | -2.85312500 | H  | -4.03658300 | -1.75825400 | 3.22491200  |
| H                                            | 2.26795400  | 3.36954100  | 3.00333400  | H  | -2.77282200 | 3.57368400  | 2.74087300  |
| H                                            | 2.68863100  | -2.30474200 | -2.66150100 | H  | -6.56246600 | -0.18217600 | 2.47565800  |

|   |             |             |             |
|---|-------------|-------------|-------------|
| H | -4.73055900 | 0.61068400  | 3.86435800  |
| H | -4.93157800 | -2.25224700 | 1.79088800  |
| H | -4.81293100 | -3.15380300 | -0.20012700 |
| H | -2.29272600 | -2.95270900 | 3.96344200  |
| H | -5.21880600 | -0.74179700 | -0.96255000 |
| H | -0.56251600 | 1.78468400  | -0.54111200 |
| H | -6.34774000 | -0.64285300 | 0.78384900  |
| H | -3.53901000 | -2.62259500 | -1.31252600 |
| H | -1.24426600 | -3.82661700 | 2.83410700  |
| H | -1.84726100 | 4.60612800  | 1.63666800  |
| H | -1.77228700 | -3.38395700 | 0.29150500  |
| H | -2.78222700 | 4.57371600  | -0.36746000 |
| H | -7.04962100 | 0.81742900  | -2.85753000 |
| H | 0.30205000  | 2.48649600  | 0.84392900  |
| H | -3.06971900 | 0.73144200  | 3.26130600  |
| H | -4.95827800 | -1.39457600 | -3.31553700 |
| H | -4.70397100 | 0.30061200  | -3.78699500 |
| H | -7.40677700 | 0.50969400  | -1.14947900 |
| H | -4.31698100 | 1.87054900  | 2.69184600  |
| H | -3.51227700 | -0.51439600 | -2.75985400 |
| H | -4.52101400 | 4.60242100  | -2.11662600 |
| H | -0.99828400 | 3.53672600  | 2.75437200  |
| H | -0.55051100 | -2.65321800 | 3.95582100  |
| H | -7.24609900 | -0.84159500 | -2.28925900 |
| H | -3.73646900 | -4.33794000 | -0.93913100 |
| H | -6.24045800 | 1.07229900  | 1.27002300  |
| O | 0.66482600  | -1.39474400 | -5.96802000 |
| H | 1.61834700  | -1.33166300 | -6.09912500 |
| H | 0.28001100  | -0.76667100 | -6.59076300 |

#### CI-INT1

$E_{\text{solv}} = -1571.398586$  a.u.

Zero-point energy correction = 0.465795 a.u.

|    |             |             |             |
|----|-------------|-------------|-------------|
| Cu | -0.55693200 | 1.40315500  | -1.29049100 |
| N  | -0.12277400 | -0.63549700 | 0.61979000  |
| C  | 1.84734000  | -1.27861600 | -0.70691200 |
| C  | 1.29230000  | -0.51933800 | 0.33871900  |
| C  | -2.39195700 | -0.28659800 | 0.45017400  |
| C  | 1.01368300  | -2.10379000 | -1.66648000 |
| C  | 2.05598700  | 0.39929700  | 1.08078500  |
| C  | -2.15909900 | -1.23368300 | 1.64630900  |
| C  | -3.03312900 | -1.01448600 | -0.75469100 |
| C  | -1.00821900 | 0.10122500  | 0.00240300  |
| C  | -0.67745200 | -1.63792900 | 1.62377900  |
| C  | 1.44613400  | 1.39067600  | 2.05109700  |
| C  | 4.00979800  | -0.32465400 | -0.16047800 |
| C  | 3.42509300  | 0.46685400  | 0.81792600  |
| C  | -3.20758100 | 0.96117800  | 0.81993600  |
| C  | 3.22163400  | -1.17058600 | -0.92756200 |
| C  | 1.53860800  | -3.52565900 | -1.84255700 |
| C  | -0.46285900 | -3.06223100 | 1.13100200  |
| C  | 1.45976800  | 2.79089500  | 1.43466000  |
| C  | -2.51985600 | 1.90959100  | 1.79045600  |
| C  | -0.00598300 | -1.47932600 | 2.97737100  |
| C  | 2.13702100  | 1.39620900  | 3.41164400  |
| C  | 0.91927800  | -1.39321700 | -3.01777700 |
| C  | -4.48682200 | -1.41115500 | -0.55257600 |
| H  | -0.00589600 | -2.17121300 | -1.27209000 |
| H  | -2.43568600 | -1.91105600 | -0.98185900 |
| H  | -4.16500600 | 0.62887600  | 1.24471300  |
| H  | 1.90912500  | -1.29160700 | -3.48088900 |
| H  | 4.03944100  | 1.16885200  | 1.37872200  |
| H  | -2.94826200 | -0.36318700 | -1.63818700 |
| H  | -2.80246200 | -2.12017200 | 1.59897600  |
| H  | 1.64135700  | -4.04683400 | -0.88353400 |
| H  | -0.45017900 | -2.20111100 | 3.67168200  |
| H  | -0.84942700 | -3.75350600 | 1.88781500  |
| H  | -2.39169500 | -0.72686800 | 2.59060600  |
| H  | -2.25244800 | 1.41753900  | 2.73487400  |
| H  | -4.62622900 | -2.00965200 | 0.35621300  |
| H  | 0.39419200  | 1.12257200  | 2.20888800  |

|    |             |             |             |
|----|-------------|-------------|-------------|
| H  | 0.49478400  | -0.38452600 | -2.91072200 |
| H  | -0.15549000 | -0.47947700 | 3.39825600  |
| H  | -1.59937300 | 2.32785700  | 1.36064400  |
| H  | -5.14029800 | -0.53528600 | -0.47879400 |
| H  | 2.51886400  | -3.53600500 | -2.33483100 |
| H  | -3.45040700 | 1.50136600  | -0.10844200 |
| H  | 3.67734800  | -1.74774200 | -1.73000300 |
| H  | 3.17129700  | 1.75406800  | 3.33734600  |
| H  | 0.27980900  | -1.96072900 | -3.70456500 |
| H  | -0.99296800 | -3.26691300 | 0.19455000  |
| H  | 0.96759800  | 3.50855000  | 2.10258800  |
| H  | 2.48725700  | 3.13635600  | 1.26348000  |
| H  | 2.16063400  | 0.39756700  | 3.86263800  |
| H  | 0.60280800  | -3.28087600 | 0.99439500  |
| H  | 0.93666400  | 2.80860600  | 0.46732700  |
| H  | 5.07917500  | -0.25962400 | -0.34628600 |
| H  | 0.85240800  | -4.10432600 | -2.47168900 |
| H  | -4.83696300 | -2.01197700 | -1.39777100 |
| H  | 1.60913500  | 2.06791400  | 4.09854100  |
| H  | -3.17369600 | 2.75098300  | 2.04058600  |
| H  | 1.06921700  | -1.68784300 | 2.92098500  |
| Cl | -0.06390200 | 2.89226300  | -2.73951900 |

#### CI-TS1

$E_{\text{solv}} = -1654.525328$  a.u.

Zero-point energy correction = 0.529752 a.u.

|    |             |             |             |
|----|-------------|-------------|-------------|
| Cu | 0.28645700  | -1.31422000 | -1.55416400 |
| N  | 0.57351000  | 0.78363400  | 0.50848700  |
| C  | -1.33771200 | 1.84529500  | -0.64789900 |
| C  | -0.84209200 | 1.07427500  | 0.42127100  |
| C  | 2.56702800  | -0.31441600 | 0.17251700  |
| C  | -0.46942700 | 2.44793900  | -1.73487900 |
| C  | -1.70617400 | 0.50053800  | 1.37850700  |
| C  | 2.78820900  | 0.72062300  | 1.29401200  |
| C  | 3.33502600  | 0.04471500  | -1.11968900 |
| C  | 1.08955400  | -0.23375400 | -0.14908300 |
| C  | 1.56111600  | 1.63606800  | 1.30177100  |
| C  | -1.23860200 | -0.37777200 | 2.52395500  |
| C  | -3.58504200 | 1.51014800  | 0.21200100  |
| C  | -3.07818100 | 0.74089600  | 1.25302800  |
| C  | 2.92255900  | -1.74391800 | 0.61609200  |
| C  | -2.71831100 | 2.04918400  | -0.72577800 |
| C  | -0.60962000 | 3.97018900  | -1.77678400 |
| C  | 1.82476000  | 2.95451100  | 0.58429700  |
| C  | -1.75768000 | -1.80893800 | 2.39820900  |
| C  | 2.04014300  | -2.31801400 | 1.71465600  |
| C  | 1.06921300  | 1.95004800  | 2.70301800  |
| C  | -1.64574400 | 0.20048600  | 3.87951600  |
| C  | -0.78158900 | 1.85949800  | -3.11041500 |
| C  | 4.84906800  | -0.04785300 | -1.01286900 |
| H  | 0.57520500  | 2.20295600  | -1.51567500 |
| H  | 3.05012800  | 1.06184500  | -1.43069200 |
| H  | 3.97166000  | -1.74558100 | 0.94535400  |
| H  | -1.82961400 | 2.02737500  | -3.39145600 |
| H  | -3.76083300 | 0.31672900  | 1.98804600  |
| H  | 2.98120200  | -0.62085100 | -1.92104500 |
| H  | 3.70503700  | 1.30397900  | 1.14879000  |
| H  | -0.46771600 | 4.43155000  | -0.79269700 |
| H  | 1.81732000  | 2.57898100  | 3.19832300  |
| H  | 2.56391400  | 3.52157200  | 1.16118100  |
| H  | 2.88387600  | 0.22129700  | 2.26634400  |
| H  | 2.03262500  | -1.68927700 | 2.61538800  |
| H  | 5.24376000  | 0.55649300  | -0.18661500 |
| H  | -0.14503900 | -0.43708300 | 2.48295600  |
| H  | -0.58223000 | 0.78068800  | -3.13750700 |
| H  | 0.94102200  | 1.05126700  | 3.31335500  |
| H  | 1.00471200  | -2.43561700 | 1.36928600  |
| H  | 5.18358800  | -1.07968500 | -0.85948300 |
| H  | -1.60368500 | 4.26452400  | -2.13661200 |
| H  | 2.87228600  | -2.39978300 | -0.26789500 |
| H  | -3.11926500 | 2.63771600  | -1.54892300 |

|    |             |             |             |    |             |             |             |
|----|-------------|-------------|-------------|----|-------------|-------------|-------------|
| H  | -2.73285800 | 0.15011900  | 4.01891900  | H  | -5.24134700 | -3.40209300 | -1.68559600 |
| H  | -0.15364600 | 2.34092800  | -3.87004600 | H  | -4.77408100 | -1.68830000 | 4.21698400  |
| H  | 2.22933100  | 2.81360000  | -0.42355000 | H  | -3.16153300 | -1.15748400 | -4.11813900 |
| H  | -1.38409700 | -2.41354700 | 3.23396500  | H  | -5.30926600 | 1.81489600  | -2.01066100 |
| H  | -2.85525600 | -1.84401500 | 2.43774500  | H  | -1.87920700 | -0.75100400 | 3.95355200  |
| H  | -1.34486300 | 1.24718600  | 3.99458300  | H  | -2.40139900 | -2.33258800 | 3.33931900  |
| H  | 0.91730400  | 3.56501300  | 0.52166300  | H  | -5.57710200 | -0.24480800 | 3.57772200  |
| H  | -1.41952500 | -2.28719800 | 1.46989800  | H  | -6.35786900 | 0.89910100  | -0.89074100 |
| H  | -4.65550000 | 1.68249400  | 0.13164300  | H  | -1.55020700 | -1.20587300 | 2.26773100  |
| H  | 0.12879200  | 4.39899000  | -2.46446300 | H  | -5.29866000 | -4.44239400 | 0.55222500  |
| H  | 5.31732600  | 0.31386300  | -1.93400200 | H  | -5.61807000 | -0.60701300 | -4.17282300 |
| H  | -1.18537100 | -0.37843300 | 4.68895700  | H  | -1.24578500 | 3.85517100  | -3.43157100 |
| H  | 2.39803100  | -3.30737700 | 2.01875800  | H  | -4.19821500 | -0.08373200 | 4.68305600  |
| H  | 0.12702900  | 2.51153400  | 2.68308800  | H  | -0.52578500 | 2.89267000  | 2.53943300  |
| B  | -2.34549400 | -1.69709700 | -2.15124700 | H  | -5.95861800 | 1.06922300  | 1.63401200  |
| H  | -2.47048600 | -2.52760900 | -2.98110200 | Cu | 1.51232600  | -1.49357500 | -0.29243300 |
| H  | 0.15858500  | -1.57973100 | -3.09820400 | N  | 3.88273300  | 0.14173900  | 0.09607700  |
| H  | -2.06812600 | -0.56301800 | -2.34491300 | C  | 2.86121800  | 2.19785800  | -0.77700100 |
| N  | -3.19213400 | -1.90975300 | -0.86677600 | C  | 3.14064400  | 1.36189000  | 0.31862700  |
| H  | -4.18874100 | -1.94163100 | -1.09833500 | C  | 4.40887000  | -2.04008000 | -0.42601200 |
| H  | -2.92610100 | -2.80300000 | -0.43503600 | C  | 3.02002000  | 1.73577600  | -2.21082700 |
| H  | -3.06544700 | -1.16094000 | -0.17494200 | C  | 2.75854000  | 1.69080300  | 1.63038500  |
| Cl | -0.70898500 | -3.54377100 | -0.72898600 | C  | 5.71315700  | -1.35120400 | 0.02167900  |

### CI-INT2

$E_{\text{calc}} = -2682.437316$  a.u.

Zero-point energy correction = 0.957405 a.u.

|    |             |             |             |   |            |             |             |
|----|-------------|-------------|-------------|---|------------|-------------|-------------|
| Cu | -1.32968500 | -0.66486100 | -0.31858400 | C | 4.38606500 | -2.31689300 | -1.94839400 |
| N  | -3.75921600 | 0.60606000  | 0.01405600  | C | 3.33722500 | -1.00740500 | -1.00740500 |
| C  | -4.57664800 | -1.48537200 | -0.97906300 | C | 5.41161700 | 0.14734200  | 0.15527700  |
| C  | -4.22901800 | -0.75701200 | 0.17392900  | C | 2.80851000 | 0.68997200  | 2.76646100  |
| C  | -2.25707000 | 2.28815700  | -0.45249800 | C | 2.02199600 | 3.84412500  | 0.79301500  |
| C  | -4.44552200 | -0.93231900 | -2.38462100 | C | 2.21283700 | 2.95784400  | 1.84431100  |
| C  | -4.18666400 | -1.34843400 | 1.44915800  | C | 4.11038600 | -3.32640200 | 0.35978900  |
| C  | -3.61945700 | 2.96053600  | -0.16270000 | C | 2.30867300 | 3.45120300  | -0.50762200 |
| C  | -1.85387000 | 2.41793500  | -1.93789100 | C | 3.63025600 | 2.78730600  | -3.13085500 |
| C  | -2.49641400 | 0.82815900  | -0.22815100 | C | 5.98650200 | 0.96991400  | -0.98885300 |
| C  | -4.65044000 | 1.84058100  | 0.07676900  | C | 1.40857300 | 0.11284000  | 2.99085000  |
| C  | -3.62912800 | -0.65329200 | 2.67492100  | C | 3.81306600 | -3.11848500 | 1.83736700  |
| C  | -4.98988600 | -3.40552800 | 0.44439200  | C | 5.89841900 | 0.72265900  | 1.47449000  |
| C  | -4.58891100 | -2.68102100 | 1.55778100  | C | 3.36402900 | 1.26649800  | 4.06411300  |
| C  | -1.12615700 | 2.76537200  | 0.46620800  | C | 1.66145500 | 1.28192000  | -2.74797000 |
| C  | -4.96763400 | -2.81451300 | -0.81136800 | C | 5.33480700 | -3.41370300 | -2.40513400 |
| C  | -5.71836900 | -1.11501500 | -3.20678000 | H | 3.67695600 | 0.85935200  | -2.22373600 |
| C  | -5.72566800 | 1.78870900  | -0.99839300 | H | 4.62376300 | -1.38212900 | -2.47907800 |
| C  | -2.28976800 | -1.27227600 | 3.07967900  | H | 4.97221300 | -3.99861300 | 0.24883000  |
| C  | -1.34726300 | 2.48128900  | 1.94260000  | H | 0.96609100 | 2.13100600  | -2.79837200 |
| C  | -5.32157900 | 1.94007000  | 1.43735900  | H | 1.92608100 | 3.25051500  | 2.85288600  |
| C  | -4.60366300 | -0.66891000 | 3.84955700  | H | 3.35669500 | -2.57704800 | -2.24091600 |
| C  | -3.24659000 | -1.55665900 | -3.10026300 | H | 6.53068400 | -1.51968900 | -0.68872300 |
| C  | -1.40102300 | 3.80915100  | -2.34869900 | H | 4.58471600 | 3.16518300  | -2.74647800 |
| H  | -4.24541700 | 0.14200500  | -2.31738100 | H | 6.99241100 | 0.66637700  | 1.48972600  |
| H  | -2.70996200 | 2.10578700  | -2.55699000 | H | 7.07803700 | 0.97158400  | -0.89710600 |
| H  | -0.99111600 | 3.84584400  | 0.31653300  | H | 6.04783600 | -1.75019000 | 0.98673500  |
| H  | -3.34558500 | -2.64764400 | -3.16852500 | H | 4.63343900 | -2.60726200 | 2.35750600  |
| H  | -4.56630200 | -3.16426000 | 2.53278400  | H | 6.36563600 | -3.22552800 | -2.08080700 |
| H  | -1.05183600 | 1.69251800  | -2.14370900 | H | 3.45402100 | -0.14554800 | 2.46784800  |
| H  | -3.93355800 | 3.59184500  | -1.00233500 | H | 1.20730000 | 0.51195600  | -2.10404200 |
| H  | -6.59678900 | -0.70457900 | -2.69548400 | H | 5.52620900 | 0.15557800  | 2.33455500  |
| H  | -5.96136400 | 2.82913300  | 1.44482100  | H | 2.90121500 | -2.52340600 | 1.98904700  |
| H  | -6.36859800 | 2.66834800  | -0.88579200 | H | 5.03734200 | -4.39544600 | -2.02155600 |
| H  | -3.56163500 | 3.61463900  | 0.71484600  | H | 2.95916100 | 3.64445400  | -3.26686500 |
| H  | -2.27568000 | 2.93057400  | 2.31840000  | H | 3.25841500 | -3.83666100 | -0.11747600 |
| H  | -2.14085400 | 4.57578900  | -2.08629600 | H | 2.09227300 | 4.12742300  | -1.33297600 |
| H  | -3.42898900 | 0.39352300  | 2.42068600  | H | 2.69834400 | 2.02942300  | 4.48586400  |
| H  | -2.30512800 | -1.33926400 | -2.57465700 | H | 1.76228400 | 0.86583400  | -3.75743800 |
| H  | -4.59786700 | 2.04712200  | 2.25241800  | H | 5.73846800 | 0.55434800  | -1.97148400 |
| H  | -1.39049900 | 1.40231000  | 2.14807500  | H | 1.43137100 | -0.67832700 | 3.75056000  |
| H  | -0.45331300 | 4.08322100  | -1.86859200 | H | 0.71354800 | 0.89180700  | 3.33140200  |
| H  | -5.91636000 | -2.17381100 | -3.41407600 | H | 4.34964100 | 1.72336600  | 3.91829100  |
| H  | -0.18771000 | 2.29011300  | 0.13375000  | H | 5.64805200 | 2.01165600  | -0.94304600 |
|    |             |             |             | H | 0.99576200 | -0.31621700 | 2.06371500  |
|    |             |             |             | H | 1.60553200 | 4.83095300  | 0.98321900  |
|    |             |             |             | H | 3.80939000 | 2.35714000  | -4.12265400 |

|    |             |             |             |
|----|-------------|-------------|-------------|
| H  | 5.34115500  | -3.47616000 | -3.49772500 |
| H  | 3.46278900  | 0.47340000  | 4.81392200  |
| H  | 3.66048500  | -4.07793200 | 2.34118600  |
| H  | 5.61663300  | 1.77592000  | 1.58936500  |
| Cl | -0.35389400 | -2.60978700 | -0.38944200 |

### Cl-INT3

$E_{\text{solv}} = -2765.652275$  a.u.

Zero-point energy correction = 1.02507 a.u.

|    |             |             |             |
|----|-------------|-------------|-------------|
| Cu | -1.46544700 | 0.98935000  | 0.74604200  |
| N  | -3.91936800 | -0.05544100 | -0.48489000 |
| C  | -3.07987800 | -2.35916500 | -0.55264500 |
| C  | -3.75119300 | -1.34365700 | 0.15134900  |
| C  | -3.46864300 | 2.07398400  | -1.22202200 |
| C  | -2.38475600 | -2.11973400 | -1.87825400 |
| C  | -4.23290200 | -1.53411600 | 1.45751600  |
| C  | -4.83686500 | 1.67547000  | -1.81581100 |
| C  | -2.37113000 | 2.16729800  | -2.30364800 |
| C  | -3.05233200 | 0.91435000  | -0.34825300 |
| C  | -5.13952200 | 0.24221200  | -1.35397900 |
| C  | -4.78694500 | -0.40986100 | 2.30953800  |
| C  | -3.50420300 | -3.84417700 | 1.31679800  |
| C  | -4.10651200 | -2.80790400 | 2.01600200  |
| C  | -3.53765000 | 3.37466400  | -0.40987500 |
| C  | -2.98001800 | -3.61325300 | 0.05207400  |
| C  | -2.70216100 | -3.18425600 | -2.92413100 |
| C  | -5.25498700 | -0.73123900 | -2.51739700 |
| C  | -3.77167400 | -0.00843400 | 3.38076200  |
| C  | -4.37891400 | 3.29806600  | 0.85383300  |
| C  | -6.41078200 | 0.15345900  | -0.52275900 |
| C  | -6.12961100 | -0.75363300 | 2.94868100  |
| C  | -0.87499900 | -2.00891700 | -1.67196000 |
| C  | -2.52118900 | 3.31416100  | -3.28838400 |
| H  | -2.71387300 | -1.15208800 | -2.27155100 |
| H  | -2.33655100 | 1.20952500  | -2.85013600 |
| H  | -3.92447900 | 4.16714200  | -1.06524100 |
| H  | -0.46510600 | -2.93897900 | -1.25048300 |
| H  | -4.47321300 | -2.98401200 | 3.02562200  |
| H  | -1.40121400 | 2.25153800  | -1.79234100 |
| H  | -4.82232400 | 1.72580700  | -2.91118700 |
| H  | -3.78145500 | -3.31598700 | -3.06253500 |
| H  | -7.26475600 | 0.38493700  | -1.16880400 |
| H  | -6.16913000 | -0.49337300 | -3.07236500 |
| H  | -5.62883500 | 2.35714700  | -1.48392700 |
| H  | -5.41923400 | 3.02160100  | 0.63871500  |
| H  | -3.49027200 | 3.29583800  | -3.80212100 |
| H  | -4.93532100 | 0.46808600  | 1.67033800  |
| H  | -0.62737700 | -1.19405600 | -0.97689100 |
| H  | -6.41809300 | 0.86979100  | 0.30578300  |
| H  | -3.97543700 | 2.56107900  | 1.56189000  |
| H  | -2.42223900 | 4.28765000  | -2.79528300 |
| H  | -2.27858100 | -4.15826700 | -2.64971400 |
| H  | -2.51199800 | 3.67224300  | -0.14421000 |
| H  | -2.46786300 | -4.41797500 | -0.47224200 |
| H  | -6.03026200 | -1.55661400 | 3.68950400  |
| H  | -0.37111400 | -1.81186000 | -2.62781900 |
| H  | -4.41740000 | -0.65058600 | -3.21767800 |
| H  | -4.15935000 | 0.82546400  | 3.97947400  |
| H  | -3.56141100 | -0.84567100 | 4.05935200  |
| H  | -6.86838100 | -1.07472100 | 2.20523500  |
| H  | -5.33841500 | -1.76805600 | -2.17084300 |
| H  | -2.81815100 | 0.30241300  | 2.93234100  |
| H  | -3.42184600 | -4.83003000 | 1.76826000  |
| H  | -2.26703000 | -2.90251400 | -3.89006600 |
| H  | -1.74043400 | 3.25444800  | -4.05458400 |
| H  | -6.53188400 | 0.12226000  | 3.47104300  |
| H  | -4.40269300 | 4.26529200  | 1.36568100  |
| H  | -6.55899400 | -0.85692200 | -0.12320000 |
| Cu | 1.40167400  | -0.91034900 | 0.74182100  |
| N  | 3.98256800  | -0.22175700 | -0.32798000 |
| C  | 3.23979700  | 2.02610700  | -0.97962300 |

|    |             |             |             |
|----|-------------|-------------|-------------|
| C  | 3.77778100  | 1.17171700  | -0.00139400 |
| C  | 3.55435400  | -2.45720500 | -0.66105100 |
| C  | 2.69338100  | 1.53071000  | -2.30376400 |
| C  | 4.09443400  | 1.62071500  | 1.29374700  |
| C  | 5.05979600  | -2.23785000 | -0.90650500 |
| C  | 2.78278400  | -2.70067300 | -1.97957400 |
| C  | 3.06133200  | -1.12991300 | -0.14297000 |
| C  | 5.29607500  | -0.72174500 | -0.92713600 |
| C  | 4.48371500  | 0.68716200  | 2.42253200  |
| C  | 3.50952100  | 3.86489500  | 0.58215700  |
| C  | 3.95423100  | 2.98355700  | 1.55925900  |
| C  | 3.25979100  | -3.57830100 | 0.34627900  |
| C  | 3.13021800  | 3.38291000  | -0.66502400 |
| C  | 3.18665300  | 2.34068900  | -3.49892300 |
| C  | 5.49997400  | -0.17035200 | -2.33150000 |
| C  | 3.32346500  | 0.54389700  | 3.40835400  |
| C  | 3.72175600  | -3.29989600 | 1.76911600  |
| C  | 6.47539600  | -0.30686600 | -0.06376700 |
| C  | 5.75062900  | 1.13043300  | 3.14899400  |
| C  | 1.16598000  | 1.51762600  | -2.25969300 |
| C  | 3.04002600  | -4.05293800 | -2.62473600 |
| H  | 3.01499900  | 0.49401600  | -2.44635800 |
| H  | 3.03585700  | -1.90046800 | -2.69170100 |
| H  | 3.73267400  | -4.49969700 | -0.02077800 |
| H  | 0.77355200  | 2.53079400  | -2.08754000 |
| H  | 4.19510700  | 3.36017400  | 2.55133900  |
| H  | 1.70831000  | -2.59202000 | -1.77544500 |
| H  | 5.39589400  | -2.69709600 | -1.84340400 |
| H  | 4.28012200  | 2.41240200  | -3.52428900 |
| H  | 7.38967900  | -0.70948100 | -0.51345300 |
| H  | 6.46381000  | -0.53138600 | -2.70646800 |
| H  | 5.65078800  | -2.69292500 | -0.10245900 |
| H  | 4.79888200  | -3.09537700 | 1.82452100  |
| H  | 4.10944100  | -4.23487400 | -2.78800900 |
| H  | 4.66755300  | -0.30926600 | 2.00207500  |
| H  | 0.79356500  | 0.87296700  | -1.45034900 |
| H  | 6.40367300  | -0.70752200 | 0.95275000  |
| H  | 3.19701200  | -2.43667200 | 2.20351200  |
| H  | 2.65024800  | -4.87469200 | -2.01443700 |
| H  | 2.78447500  | 3.36126500  | -3.49018800 |
| H  | 2.17340200  | -3.76594200 | 0.34396200  |
| H  | 2.73670500  | 4.07217300  | -1.41053300 |
| H  | 5.59625400  | 2.07281500  | 3.68875100  |
| H  | 0.75083600  | 1.15022100  | -3.20752100 |
| H  | 4.72859000  | -0.50195300 | -3.03435700 |
| H  | 3.58158500  | -0.17439300 | 4.19632300  |
| H  | 3.08917200  | 1.50448100  | 3.88540000  |
| H  | 6.59111900  | 1.27307200  | 2.46033300  |
| H  | 5.53560700  | 0.92537200  | -2.32953900 |
| H  | 2.40953600  | 0.19340300  | 2.90780300  |
| H  | 3.44264000  | 4.92952900  | 0.79917300  |
| H  | 2.85496600  | 1.86996800  | -4.43139200 |
| H  | 2.54571800  | -4.10542000 | -3.59989600 |
| H  | 6.04084000  | 0.37605200  | 3.88939700  |
| H  | 3.52270600  | -4.15962200 | 2.41664500  |
| H  | 6.58004200  | 0.78369600  | -0.01596900 |
| Cl | -0.37616700 | -0.97322100 | 1.97267500  |
| B  | 0.03697600  | 2.37715200  | 1.62726800  |
| H  | -1.09380300 | 2.21279000  | 2.11346600  |
| H  | 0.88705600  | 2.17560300  | 2.45737700  |
| H  | 0.25429000  | 1.68889200  | 0.61614700  |
| N  | 0.15093200  | 3.90304900  | 1.13985400  |
| H  | -0.03623000 | 4.56689800  | 1.89022600  |
| H  | 1.10526300  | 4.07867700  | 0.81474400  |
| H  | -0.47210400 | 4.14004200  | 0.36811700  |

### Cl-TS2

$E_{\text{solv}} = -2842.046493$  a.u.

Zero-point energy correction = 1.05146 a.u.

|    |            |            |             |
|----|------------|------------|-------------|
| Cu | 1.15096000 | 0.85251900 | -0.40677000 |
|----|------------|------------|-------------|

|    |             |             |             |    |             |             |             |
|----|-------------|-------------|-------------|----|-------------|-------------|-------------|
| N  | 3.69393100  | -0.20176600 | 0.42480000  | C  | -3.64912300 | 3.72914800  | 1.12973200  |
| C  | 2.54605500  | -2.33669300 | 0.89692100  | C  | -4.19624300 | 3.11919800  | 0.00730300  |
| C  | 3.20586900  | -1.49451200 | -0.01533600 | C  | -2.98424000 | -3.21218500 | -1.41666600 |
| C  | 3.68319200  | -2.06143800 | 0.84745300  | C  | -2.93884100 | 2.96659000  | 2.04456600  |
| C  | 2.28370300  | -1.97190500 | 2.34422300  | C  | -2.23891400 | 1.02357800  | 4.31398000  |
| C  | 3.32553200  | -1.81605700 | -1.38078000 | C  | -4.39439700 | -1.24819000 | 2.83723300  |
| C  | 5.13345800  | 1.56613300  | 1.02057400  | C  | -3.71425000 | 1.49030200  | -2.62909600 |
| C  | 3.00911100  | 2.41490500  | 2.19333800  | C  | -3.95271700 | -2.51875300 | -2.36087000 |
| C  | 2.93733000  | 0.85852900  | 0.32244400  | C  | -5.91190500 | -0.81540500 | 0.93002400  |
| C  | 5.09669000  | 0.03319900  | 0.98135500  | C  | -6.07568100 | 1.58839200  | -1.77789000 |
| C  | 3.94214800  | -0.88182500 | -2.40435600 | C  | -0.43569500 | 1.37281200  | 2.63154600  |
| C  | 2.16190800  | -3.89582300 | -0.92429200 | C  | -1.73353600 | -4.74646100 | 0.84484700  |
| C  | 2.79416500  | -3.03341500 | -1.80959800 | H  | -1.86758600 | -0.20909600 | 2.59426000  |
| C  | 3.57385200  | 3.24929400  | -0.11966300 | H  | -1.74140700 | -2.81017100 | 1.79067900  |
| C  | 2.04333800  | -3.54662500 | 0.41324800  | H  | -3.27856200 | -4.26468400 | -1.29693400 |
| C  | 2.88592600  | -2.98364200 | 3.31769400  | H  | -0.36732100 | 2.44842500  | 2.84369700  |
| C  | 5.24735300  | -0.58139900 | 2.36514300  | H  | -4.70950100 | 3.72575500  | -0.73637800 |
| C  | 2.88134900  | -0.29500000 | -3.33333800 | H  | -0.77626400 | -2.89204800 | 0.32168500  |
| C  | 3.95771900  | 2.95196500  | -1.56084700 | H  | -4.15241600 | -3.43237400 | 1.57772300  |
| C  | 6.15638800  | -0.56366600 | 0.07035400  | H  | -3.27230200 | 0.72909900  | 4.52160000  |
| C  | 5.04371300  | -1.56172000 | -3.21439200 | H  | -6.65666900 | -1.45662200 | 1.41468400  |
| C  | 0.78552900  | -1.84208300 | 2.60518700  | H  | -5.16084400 | -1.89439400 | 3.27920000  |
| C  | 3.57895200  | 3.63693900  | 2.89524400  | H  | -5.03289900 | -3.02968700 | 0.11046100  |
| H  | 2.72870600  | -0.99017300 | 2.54153700  | H  | -4.97465800 | -2.47760700 | -1.95997300 |
| H  | 3.07145500  | 1.54292300  | 2.86319500  | H  | -2.69931500 | -5.13853300 | 1.18842900  |
| H  | 4.20637000  | 4.06078700  | 0.26606300  | H  | -4.64988000 | 0.05514600  | -1.37326000 |
| H  | 0.29077400  | -2.81779100 | 2.52988600  | H  | -0.10201600 | 1.20347300  | 1.59614100  |
| H  | 2.85988300  | -3.29889900 | -2.86317200 | H  | -6.07723100 | -0.87595700 | -0.15125400 |
| H  | 1.93624400  | 2.57103400  | 2.00263600  | H  | -3.62773300 | -1.49330500 | -2.57697200 |
| H  | 5.58097400  | 1.91886300  | 1.95678500  | H  | -1.51379600 | -5.19939600 | -0.12862800 |
| H  | 3.95404300  | -3.15210500 | 3.14297300  | H  | -2.11623000 | 2.06324700  | 4.64187500  |
| H  | 7.13948400  | -0.37849000 | 0.51687200  | H  | -1.98069400 | -3.20517500 | -1.86673600 |
| H  | 6.25819800  | -0.36430200 | 2.72720100  | H  | -2.46523800 | 3.45617400  | 2.89335000  |
| H  | 5.76677300  | 1.94282600  | 0.20839100  | H  | -6.12821000 | 2.65746500  | -2.01753800 |
| H  | 5.00665200  | 2.64502500  | -1.65851400 | H  | 0.26981100  | 0.85933800  | 3.29679800  |
| H  | 4.65997700  | 3.55177100  | 3.05940900  | H  | -3.41676200 | -1.60616100 | 3.18032900  |
| H  | 4.39516200  | -0.03728000 | -1.87270200 | H  | -4.06690100 | 1.02577400  | -3.55856800 |
| H  | 0.30791200  | -1.16485700 | 1.88284600  | H  | -3.66740200 | 2.57619700  | -2.79247700 |
| H  | 6.15685400  | -0.10994900 | -0.92560800 | H  | -6.75459000 | 1.39876700  | -0.93867700 |
| H  | 3.33736400  | 2.15407600  | -1.99077100 | H  | -4.56082900 | -0.23329200 | 3.21479600  |
| H  | 3.39898100  | 4.55518600  | 2.32585200  | H  | -2.69307400 | 1.12661200  | -2.44173500 |
| H  | 2.38219500  | -3.95476600 | 3.23274700  | H  | -3.74835500 | 4.80239500  | 1.27171000  |
| H  | 2.53902100  | 3.62699500  | -0.08465200 | H  | -1.57926300 | 0.40549600  | 4.93503000  |
| H  | 1.53176600  | -4.21992700 | 1.09945000  | H  | -0.97002300 | -5.09748000 | 1.54884400  |
| H  | 4.63910100  | -2.35518400 | -3.85465100 | H  | -6.45171400 | 1.04195700  | -2.65051700 |
| H  | 0.60282700  | -1.45735700 | 3.61738200  | H  | -4.00376500 | -3.04878500 | -3.31800400 |
| H  | 4.54044200  | -0.16742500 | 3.09220700  | H  | -6.09169900 | 0.21388800  | 1.26324600  |
| H  | 3.34270100  | 0.41812500  | -4.02872100 | Cl | -0.57066600 | -1.19375300 | -3.24463100 |
| H  | 2.38193200  | -1.07562000 | -3.91974500 | B  | -0.06113500 | 2.84709600  | -1.96034200 |
| H  | 5.80858100  | -2.00969700 | -2.56957700 | H  | 1.12065500  | 2.82701300  | -1.84895400 |
| H  | 5.13555900  | -1.67008600 | 2.33305500  | H  | -0.67849000 | 2.36231600  | -2.84553300 |
| H  | 2.08859800  | 0.22501800  | -2.77444400 | H  | -0.29055900 | 1.11430700  | -1.01310100 |
| H  | 1.74964700  | -4.83779800 | -1.27918000 | N  | -0.87225000 | 3.50962700  | -0.79872000 |
| H  | 2.75990200  | -2.63726800 | 4.35027700  | H  | -0.99520300 | 4.50222800  | -1.01954600 |
| H  | 3.10835500  | 3.76138000  | 3.87562000  | H  | -1.80852100 | 3.10779800  | -0.67363900 |
| H  | 5.53396500  | -0.83180500 | -3.86938800 | H  | -0.39481200 | 3.45321200  | 0.10273400  |
| H  | 3.82185000  | 3.84073300  | -2.18680800 | O  | 0.02794700  | 4.74416400  | -2.93137500 |
| H  | 6.03523400  | -1.64911100 | -0.02950900 | H  | -0.34306900 | 4.66025200  | -3.81877400 |
| Cu | -1.11715200 | -0.37871900 | -1.14685000 | H  | 0.95507800  | 4.97942800  | -3.06417500 |
| N  | -3.43906500 | -0.46700400 | 0.65660500  |    |             |             |             |
| C  | -2.79676900 | 1.58338300  | 1.89146100  |    |             |             |             |
| C  | -3.43866200 | 0.97279300  | 0.79664400  |    |             |             |             |
| C  | -2.88988500 | -2.59704900 | -0.01292600 |    |             |             |             |
| C  | -1.86158200 | 0.86067600  | 2.84281200  |    |             |             |             |
| C  | -4.10591000 | 1.73753200  | -0.18282300 |    |             |             |             |
| C  | -4.21801900 | -2.69878000 | 0.76505900  |    |             |             |             |
| C  | -1.72425100 | -3.22869600 | 0.77206400  |    |             |             |             |
| C  | -2.57193600 | -1.11975900 | -0.08168600 |    |             |             |             |
| C  | -4.52783100 | -1.30476900 | 1.32470500  |    |             |             |             |
| C  | -4.64831500 | 1.14643200  | -1.46813100 |    |             |             |             |

**Table S1.** The thermal correction to free energy/au, electronic energies/au, gibbs free energies (G/au), entropies (S/[cal/(mol·K)]) and enthalpies (H/au) for the overall catalytic cycle.

| Species                                             | Electronic Energy (au) | Thermal Correction to Free Energy/au | G/au         | S/[cal/(mol·K)] | H/au         |
|-----------------------------------------------------|------------------------|--------------------------------------|--------------|-----------------|--------------|
| <b>1</b>                                            | -1110.987245           | 0.466617                             | -1110.520628 | 178.22          | -1110.435949 |
| <b>INT1</b>                                         | -1194.222687           | 0.535892                             | -1193.686795 | 196.24          | -1193.593555 |
| <b>NH<sub>3</sub>BH<sub>3</sub></b>                 | -83.196393             | 0.04633                              | -83.150063   | 59.548          | -83.12177    |
| <b>H<sub>2</sub>O</b>                               | -76.431298             | 0.004028                             | -76.42727    | 45.1            | -76.405842   |
| <b>TS1</b>                                          | -1270.604187           | 0.55373                              | -1270.050457 | 209.719         | -1269.950813 |
| <b>TS2</b>                                          | -1270.615174           | 0.55335                              | -1270.061824 | 211.344         | -1269.961408 |
| <b>TS3</b>                                          | -1270.614578           | 0.558674                             | -1270.055904 | 202.753         | -1269.959569 |
| <b>TS4</b>                                          | -1194.134085           | 0.528421                             | -1193.605664 | 201.099         | -1193.510116 |
| <b>TS5</b>                                          | -1194.141054           | 0.53753                              | -1193.603524 | 185.457         | -1193.515407 |
| <b>INT2</b>                                         | -2305.25595            | 1.029203                             | -2304.226747 | 323.892         | -2304.072855 |
| <b>INT2-a</b>                                       | -2305.255812           | 1.031043                             | -2304.224769 | 319.498         | -2304.072965 |
| <b>INT2-b</b>                                       | -2305.257094           | 1.03239                              | -2304.224704 | 318.97          | -2304.073151 |
| <b>INT2-c</b>                                       | -2305.258475           | 1.032036                             | -2304.226439 | 318.579         | -2304.075072 |
| <b>TS6</b>                                          | -2381.669121           | 1.048957                             | -2380.620164 | 334.353         | -2380.461302 |
| <b>TS6-a</b>                                        | -2381.660471           | 1.046402                             | -2380.614069 | 339.258         | -2380.452876 |
| <b>TS6-b</b>                                        | -2381.668786           | 1.052189                             | -2380.616597 | 330.541         | -2380.459547 |
| <b>TS6-c</b>                                        | -2381.661593           | 1.050972                             | -2380.610621 | 331.427         | -2380.453149 |
| <b>INT3</b>                                         | -2222.771288           | 0.966997                             | -2221.804291 | 306.595         | -2221.658618 |
| <b>NH<sub>3</sub>BH<sub>2</sub>(H<sub>2</sub>O)</b> | -158.901811            | 0.061332                             | -158.840479  | 72.325          | -158.806115  |
| <b>INT4</b>                                         | -2305.98365            | 1.035723                             | -2304.947927 | 322.852         | -2304.794529 |
| <b>INT5</b>                                         | -2464.908956           | 1.124383                             | -2463.784573 | 344.154         | -2463.621054 |
| <b>INT5-a</b>                                       | -2464.903921           | 1.126777                             | -2463.777144 | 340.968         | -2463.61514  |
| <b>TS7</b>                                          | -2464.904311           | 1.116938                             | -2463.787373 | 347.567         | -2463.622233 |
| <b>TS7-a</b>                                        | -2464.878561           | 1.117697                             | -2463.760864 | 345.252         | -2463.596823 |
| <b>NH<sub>3</sub>BH<sub>2</sub>OH</b>               | -158.467008            | 0.050257                             | -158.416751  | 66.57           | -158.385121  |
| <b>H<sub>2</sub></b>                                | -1.167911              | -0.001365                            | -1.169276    | 31.13           | -1.154485    |
| <b>INT6</b>                                         | -2380.524526           | 1.036285                             | -2379.488241 | 325.241         | -2379.333708 |
| <b>INT7</b>                                         | -2380.523607           | 1.035521                             | -2379.488086 | 324.716         | -2379.333803 |
| <b>TS8</b>                                          | -2456.964011           | 1.055095                             | -2455.908916 | 337.885         | -2455.748376 |
| <b>NH<sub>3</sub>BH(OH)(H<sub>2</sub>O)</b>         | -234.182694            | 0.067221                             | -234.115473  | 74.227          | -234.080205  |
| <b>TS9</b>                                          | -2540.184903           | 1.123077                             | -2539.061826 | 350.101         | -2538.895481 |

|                                                        |              |           |              |         |              |
|--------------------------------------------------------|--------------|-----------|--------------|---------|--------------|
| <b>NH<sub>3</sub>BH(OH)<sub>2</sub></b>                | -233.747267  | 0.05327   | -233.693997  | 74.266  | -233.658711  |
| <b>INT8</b>                                            | -2455.813249 | 1.04309   | -2454.770159 | 326.439 | -2454.615057 |
| <b>INT9</b>                                            | -2455.816647 | 1.039098  | -2454.777549 | 331.773 | -2454.619912 |
| <b>TS9</b>                                             | -2532.253882 | 1.062268  | -2531.191614 | 339.205 | -2531.030446 |
| <b>NH<sub>3</sub>B(OH)<sub>2</sub>(H<sub>2</sub>O)</b> | -309.465657  | 0.068703  | -309.396954  | 83.565  | -309.357249  |
| <b>TS11</b>                                            | -2615.470962 | 1.128644  | -2614.342318 | 351.608 | -2614.175258 |
| <b>NH<sub>3</sub>B(OH)<sub>3</sub></b>                 | -309.031998  | 0.057366  | -308.974632  | 80.347  | -308.936457  |
| <b>CI-INT1</b>                                         | -1571.398586 | 0.465795  | -1570.932791 | 186.559 | 0.554436     |
| <b>CI-TS1</b>                                          | -1654.525328 | 0.529752  | -1653.995576 | 203.517 | 0.62645      |
| <b>CI-INT2</b>                                         | -2682.437316 | 0.957405  | -2681.479911 | 316.618 | 1.10784      |
| <b>CI</b>                                              | -460.364255  | -0.015023 | -460.379278  | 36.586  | 0.00236      |
| <b>CI-INT3</b>                                         | -2765.652275 | 1.02507   | -2764.627205 | 336.649 | 1.185023     |
| <b>CI-TS2</b>                                          | -2842.046493 | 1.05146   | -2840.995033 | 336.377 | 1.211283     |
